# Supplementary material
Source: PubMed Central journal article supplement (PMC3625983)
Supplement: NIHMS453564-supplement-1_si_001.pdf [file NIHMS453564-supplement-1_si_001.pdf]

# Supporting Information

## **Total Synthesis of 6-Deoxyerythronolide B via C-C Bond-Forming Transfer Hydrogenation**

Xin Gao, Sang Kook Woo and Michael J. Krische\*

*University of Texas at Austin, Department of Chemistry and Biochemistry,  
Austin, TX 78712, USA*

### Table of Contents

|                                                                   |          |
|-------------------------------------------------------------------|----------|
| Graphical Summary of Previous Synthesis-----                      | S2–S25   |
| General Experimental Methods-----                                 | S26      |
| Procedure for the Preparation of (S)-I-----                       | S27      |
| Procedure and Spectral Data for Acid Fragment Synthesis-----      | S28–S54  |
| Procedure and Spectral Data for Alcohol Fragment Synthesis-----   | S55–S72  |
| Fragment Union and Total Synthesis of 6-Deoxyerythronolide B----- | S73–S102 |

### **Eqo rıgv'tgh'7c<**

Woodward R. B.; Logusch, E.; Nambiar, K. P.; Sakan, K.; Ward, D. E.; Au-Yeung, B.-W.; Balaram, P.; Browne, L. J.; Card, P. J.; Chen, C. H. Chênevert, R. B.; Fliri, A.; Froble, K.; Gais, H. J.; Garratt, D. G.; Hayakawa, K.; Heggie, W.; Hesson, D. P.; Hoppe, D.; Hoppe, I.; Hyatt, J. A.; Ikeda, D.; Jacobi, P. A.; Kim, K. S.; Kobuke, Y.; Kojima, K.; Krowicki, K.; Lee, V. J.; Leutert, T.; Malchenko, S.; Martens, J.; Matthews, R. S.; Ong, B. S.; Press, J. B.; Rajan Babu, T. V.; Rousseau, G.; Sauter, H. M.; Suzuki, M.; Tatsuta, K.; Tolbert, L. M.; Truesdales, E. A.; Uchida, I.; Ueda, Y.; Uyehara, T.; Vasella, A. T.; Vladuchick, W. C.; Wade, P. A.; Williams, R. M.; Wong, H. N.-C. *LOCo OEj go OUqe03*; : **3**, 325, 3215.

## **Graphical Summary of Prior Syntheses**

*Note:* Our step count starts from commercial materials used stoichiometrically with a retail price below \$50 / 1g.

# Erythromycin A (Woodward, *J. Am. Chem. Soc.* **1981**, *103*, 3210.)

## Fragment 1 and 2

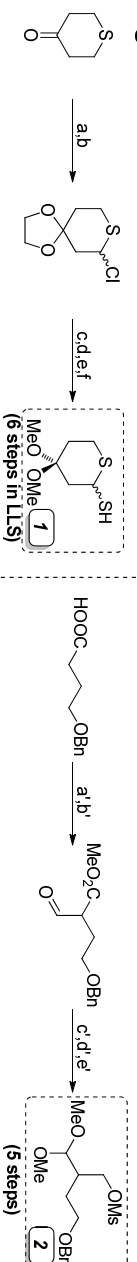

Key: (a) HOCH<sub>2</sub>CH<sub>2</sub>OH, TsOH; (b) NCS; (c) thioarea; (d) aq. NaOH; (e) aq. HCl; (f) HCl(OMe)<sub>2</sub>, TsOH  
 (a') conc. H<sub>2</sub>SO<sub>4</sub>, MeOH; (b') HCOOH, LDA; (c') conc. H<sub>2</sub>SO<sub>4</sub>, MeOH; (d') LAH; (e') MscCl, Py

## Fragment Union, Fragment 3 and 4

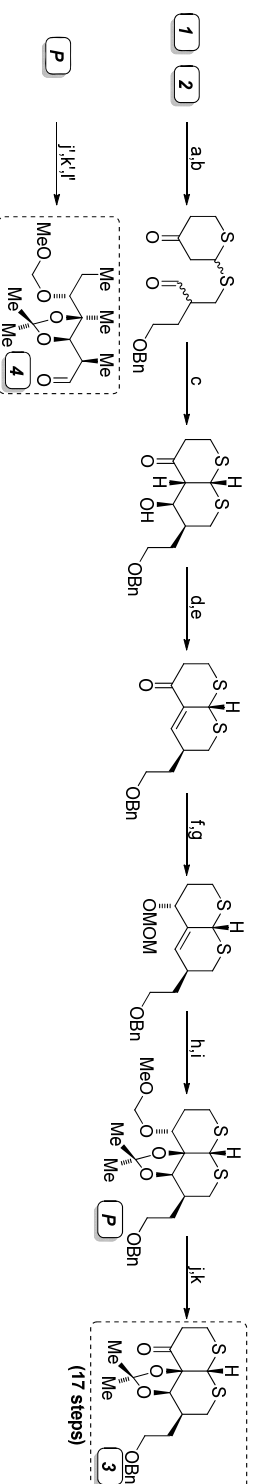

Key: (a) NaH, DMSO; (b) AcOH; (c) D-Piprine; (d) MscCl, Py; (e) alumina, EtOH; (f) NaBH<sub>4</sub>; (g) MOMI, KH; (h) OsO<sub>4</sub>, NaHSO<sub>4</sub>, Py; (i) Me<sub>2</sub>C(OMe)<sub>2</sub>, TsOH; (j) TFA; (k) TFAA, DMSO  
 (j') Raney-Ni, H<sub>2</sub>; (k') o-NO<sub>2</sub>C<sub>6</sub>H<sub>4</sub>SeCN, PBu<sub>3</sub>, then H<sub>2</sub>O<sub>2</sub>; (l) O<sub>3</sub>, then Me<sub>2</sub>S

## Fragment Union

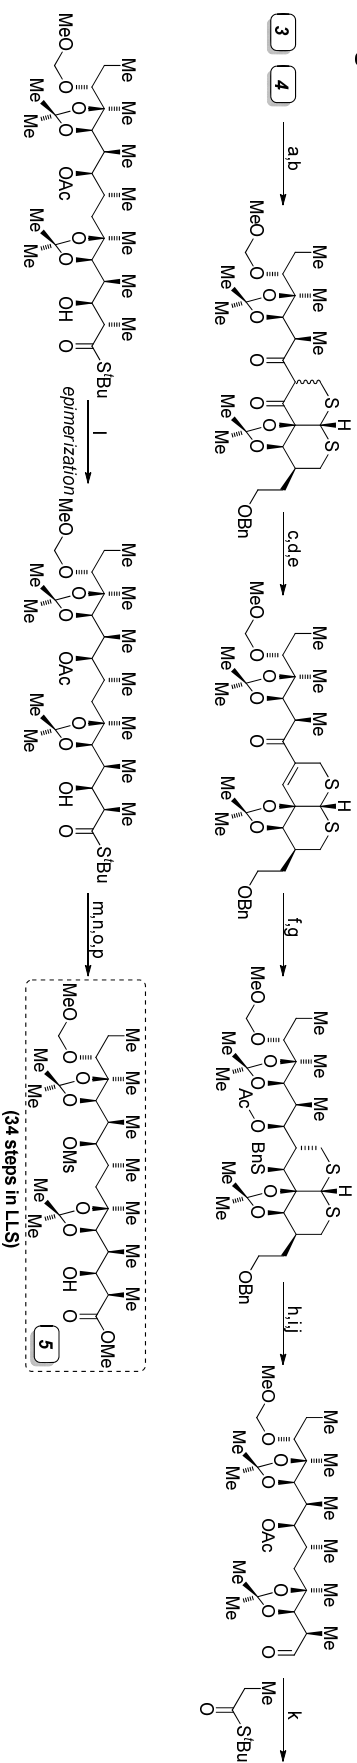

Key: (a) mesityl-Li; (b) TFAA, DMSO, /Pr<sub>2</sub>NEt; (c) KH, AcCl; (d) NaBH<sub>4</sub>; (e) MscCl, Py; (f) BnSH, BuLi; (g) LAH; (h) Raney-Ni, H<sub>2</sub>; (i) o-NO<sub>2</sub>C<sub>6</sub>H<sub>4</sub>SeCN, PBu<sub>3</sub>, then H<sub>2</sub>O<sub>2</sub>; (j) O<sub>3</sub>, then Me<sub>2</sub>S; (k) LDA; (l) BuLi, then AcOH; (m) Na<sub>2</sub>CO<sub>3</sub>; (n) Bz<sub>2</sub>O, Py; (o) MscCl, Py; (p) LiOH, H<sub>2</sub>O<sub>2</sub>



### Chiral Auxiliary and Sugar

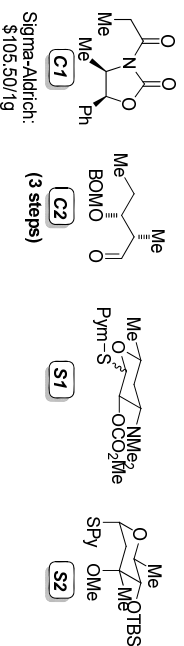

### Functionalization of Furan

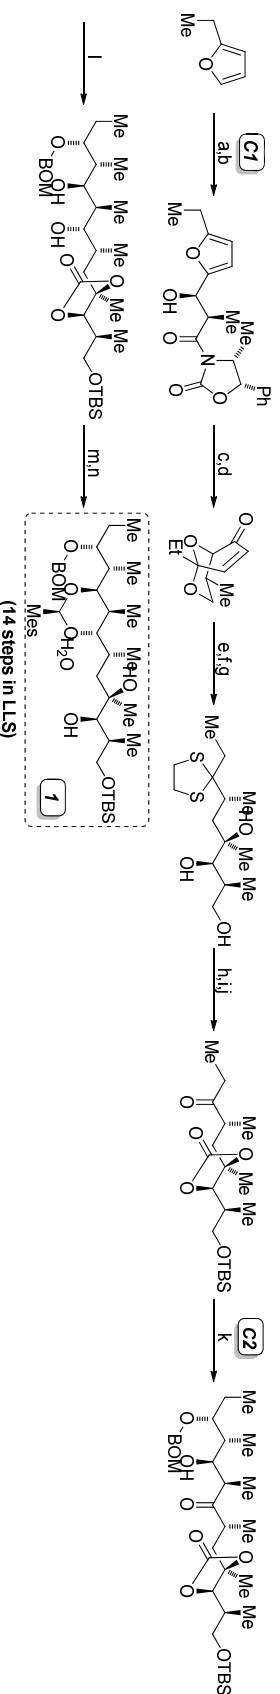

Key: (a) BuLi; (b) Bu<sub>2</sub>BOTf; (c) LiBH<sub>4</sub>; (d) Br<sub>2</sub>; (e) LiCuMe<sub>2</sub>; (f) MeLi-CeCl<sub>3</sub>; (g) PPTS; (h) TBSOTf; (i) CDI; (j) Hg(OAc)<sub>2</sub>/CaCO<sub>3</sub>; (k) LiHMDS; (l) Me<sub>2</sub>NBH(OAc)<sub>3</sub>; (m) Me<sub>3</sub>C<sub>6</sub>H<sub>2</sub>CH(OMe)<sub>2</sub>, CSA; (n) LiBH<sub>4</sub>

### Glycosylation

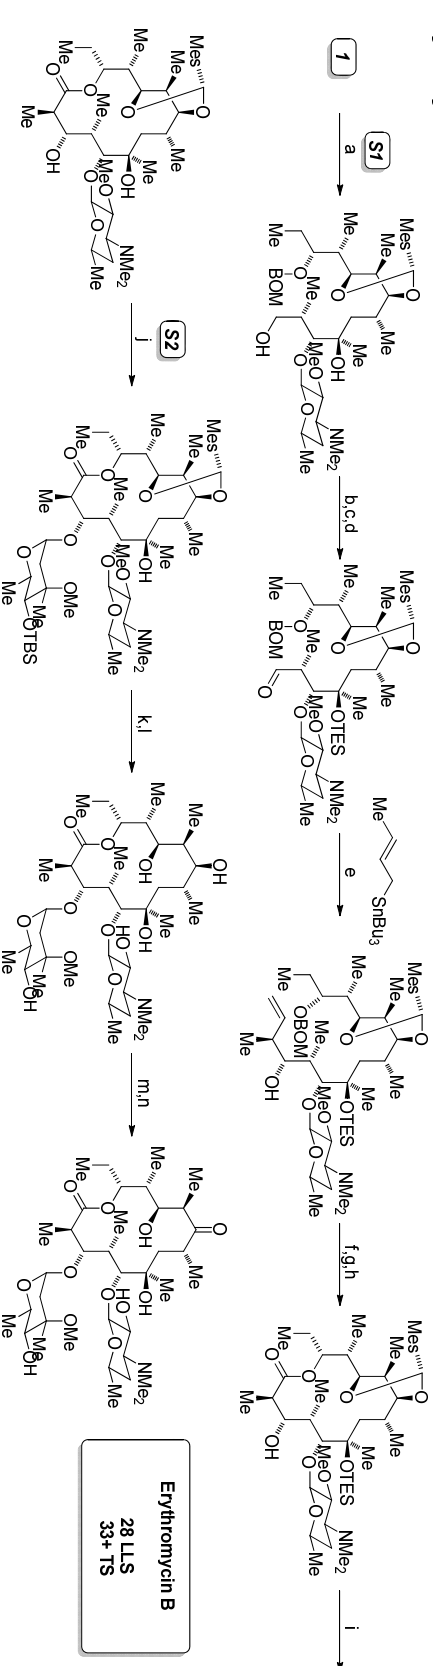

Key: (a) AgOTf, 2,6-t-Bu<sub>2</sub>Py; (b) TBAF; (c) TESOTf, PPTS, NEt<sub>3</sub>; (d) (COCl)<sub>2</sub>, DMSO, TEA; (e) BF<sub>3</sub>·OEt<sub>2</sub>; (f) OsO<sub>4</sub>, Oxone, NaHCO<sub>3</sub>; (g) Pd/C, HClO<sub>4</sub>; (h) 2,4,6-trichlorobenzoyl chloride, TEA, then DMAP; (i) TBAF; (j) Cu(OTf)<sub>2</sub>, CuO; (k) AcOH; (l) TBAF; (m) Dess-Martin Periodate; (n) MeOH, heating

**Fragment 1**

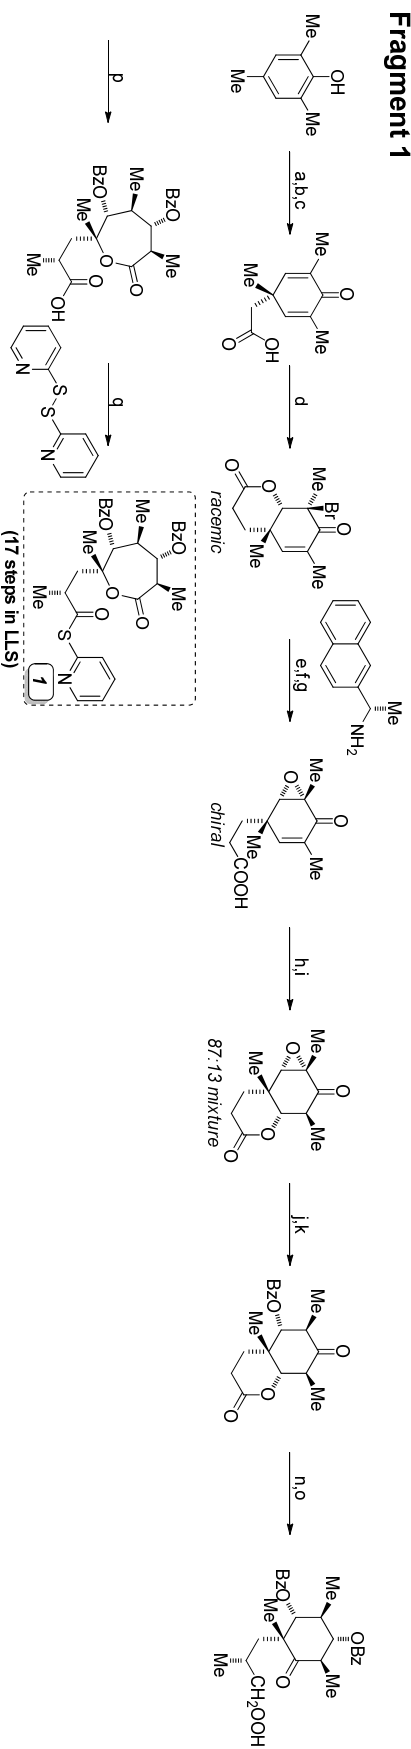

**Fragment 2**

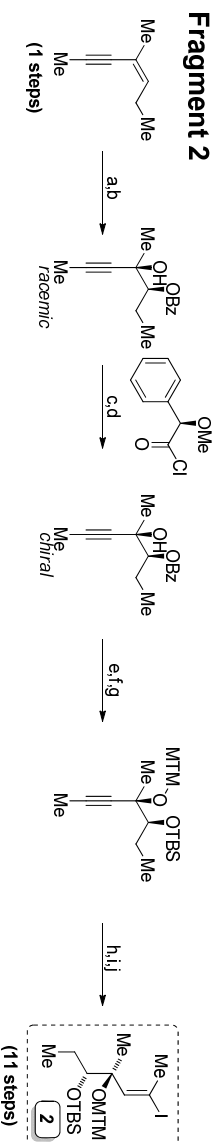

**Coupling Fragment 1 and 2**

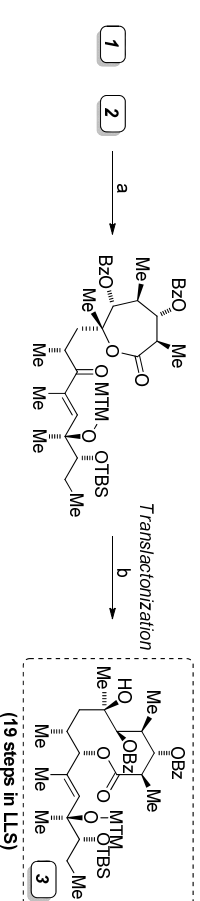



**Fragment 1**

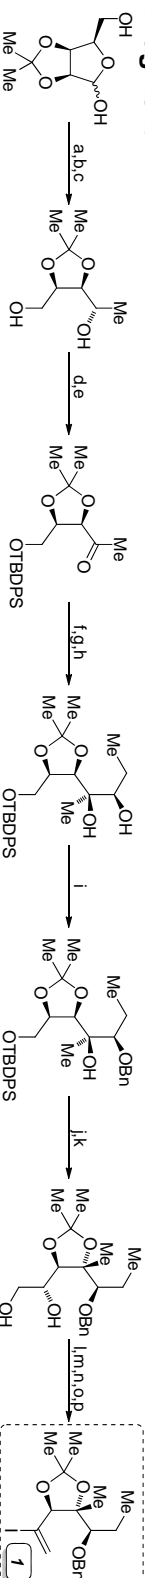

Key: (a) MeMgI; (b) NaIO<sub>4</sub>; (c) LiAlH<sub>4</sub>; (d) TBDPSPCl, imidazole; (e) PCC; (f) vinylmagnesium bromide; (g) O<sub>3</sub>, PPh<sub>3</sub>; (h) EMGBr; (i) NaH, BnBr; (j) FeCl<sub>3</sub>, acetone; (k) TBAF; (l) NaIO<sub>4</sub>; (m) MeMgI; (n) PCC; (o) NH<sub>2</sub>NH<sub>2</sub>·H<sub>2</sub>O, TEA; (p) I<sub>2</sub>, tetraethylguanidine

**Fragment 2**

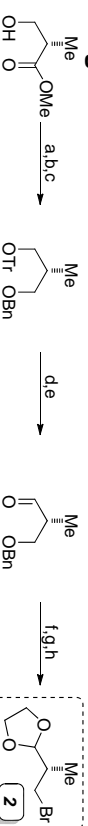

Key: (a) TiCl<sub>4</sub>, TEA, DMAP; (b) LAH; (c) NaH, BnBr; (d) amberlyst<sup>15</sup>; (e) (COCl)<sub>2</sub>, TEA, DMSO; (f) HOCH<sub>2</sub>CH<sub>2</sub>OH, TsOH; (g) H<sub>2</sub>, Pd/C; (h) EBr, PPh<sub>3</sub>, DEAD

**Fragment 3**

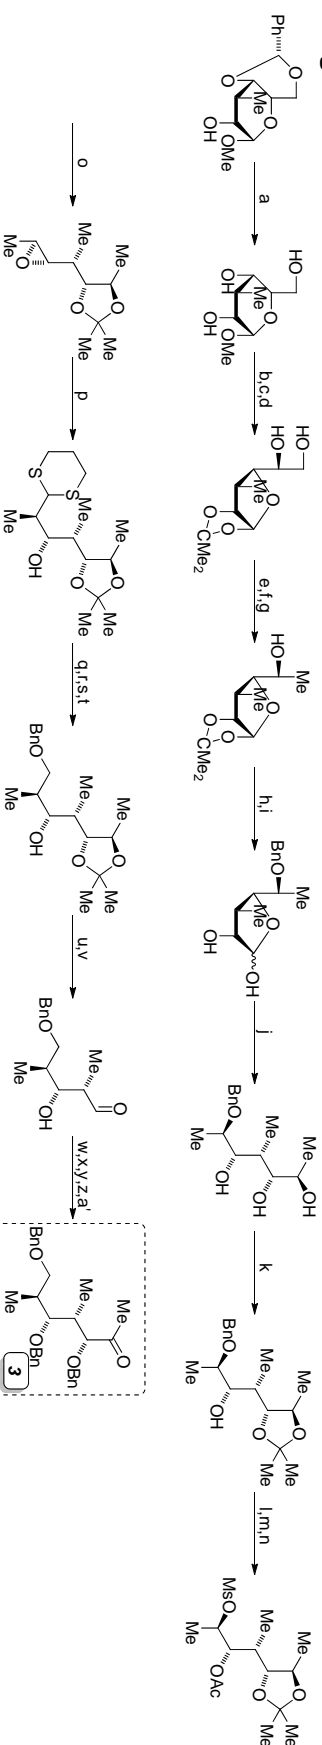

Key: (a) HCl, MeOH; (b) TsOH, acetone; (c) HCl, H<sub>2</sub>O; (d) FeCl<sub>3</sub>, acetone; (e) TsCl, Py; (f) NaOH; (g) LAH; (h) NaH, BnBr; (i) HCl, H<sub>2</sub>O; (j) MeMgBr; (k) MeC(OMe)<sub>2</sub>, TsOH; (l) Ac<sub>2</sub>O, DMAP; (m) H<sub>2</sub>, Pd/C; (n) MsCl, Py; (o) LiOH, H<sub>2</sub>O; (p) BuLi; (q) Ac<sub>2</sub>O, TEA; (r) HgCl<sub>2</sub>; (s) LAH; (t) NaH, BnBr; (u) HCl, H<sub>2</sub>O; (v) NaIO<sub>4</sub>; (w) (ES)<sub>2</sub>CH<sub>2</sub>, BuLi; (x) NaH, BnBr; (y) HgCl<sub>2</sub>; (z) MeMgBr; (a) PCC

**Fragment Union**

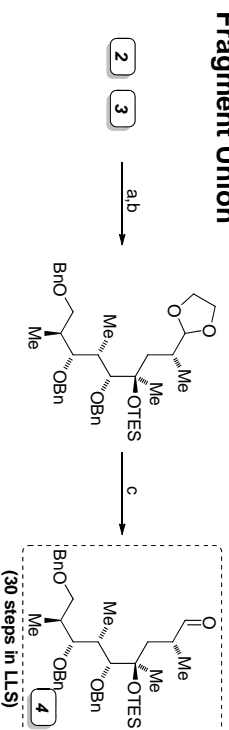

Key: (a) Mg; (b) TESOTf, 2,6-lutidine; (c) SnCl<sub>4</sub>, acetone



**Erythronolide A** (Kinoshita, *Bull. Chem. Soc. Jpn.* **1989**, *62*, 2618.) (*continued*)

**End Game**

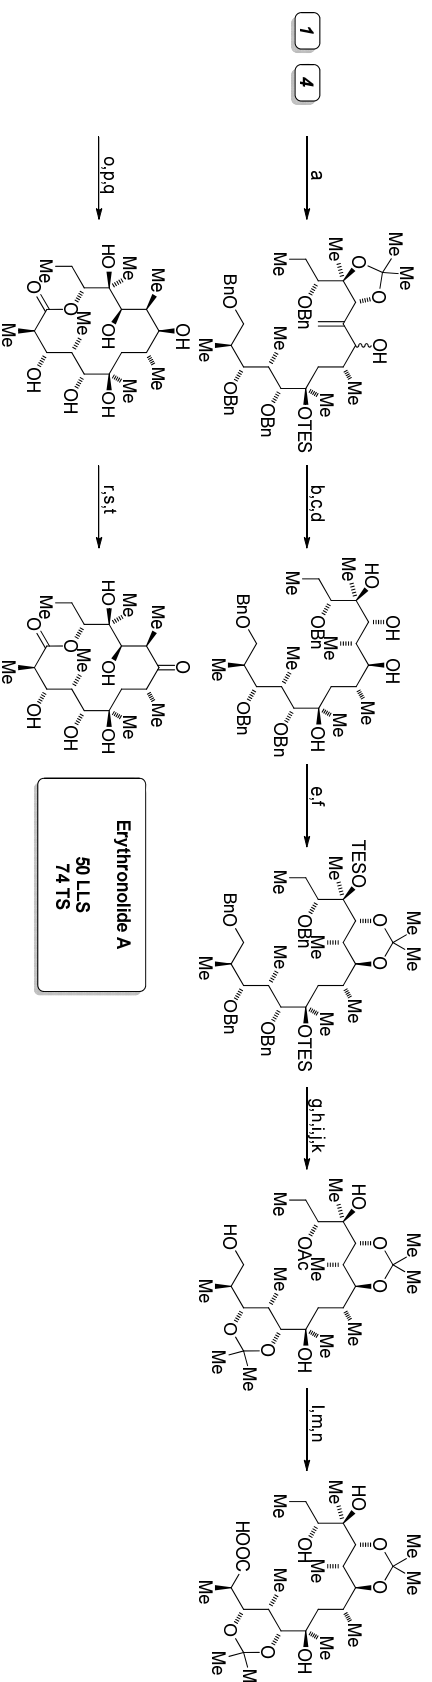

Key: (a) BuLi; (b) ClR<sub>4</sub>(PPh<sub>3</sub>)<sub>3</sub>, 50 atm H<sub>2</sub>; (c) TBAF; (d) HCl, H<sub>2</sub>O; (e) TsOH, acetone; (f) TESOTf, TEA; (g) Pd/C, H<sub>2</sub>; (h) TBDPSCI, TEA; (i) TsOH, acetone; (j) Ac<sub>2</sub>O, TEA; (k) TBAF; (l) COCl<sub>2</sub>, TEA, DMSO; (m) NaClO<sub>2</sub>; (n) LiOH, H<sub>2</sub>O; (o) C<sub>12</sub>H<sub>17</sub>N<sub>2</sub>S<sub>2</sub>; (p) CuOAc; (q) AcOH; (r) PhCH(OMe)<sub>2</sub>, CSA; (s) PCC; (t) H<sub>2</sub>, Pd/C

**Fragment 1, 2, 3**

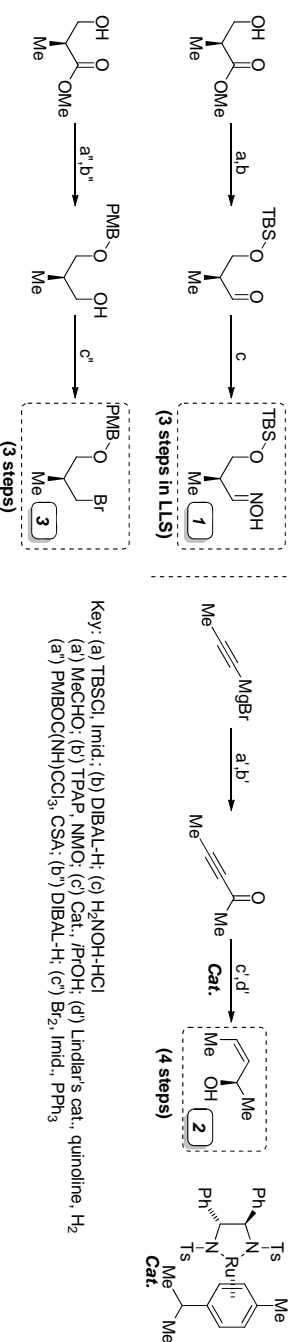

**Fragment Union**

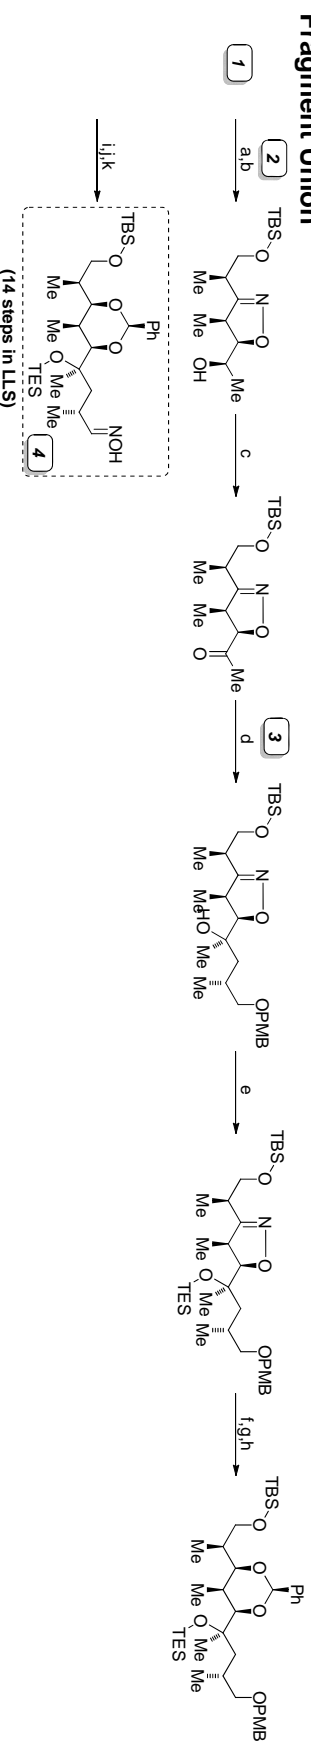

**Seco Acid and End Game**

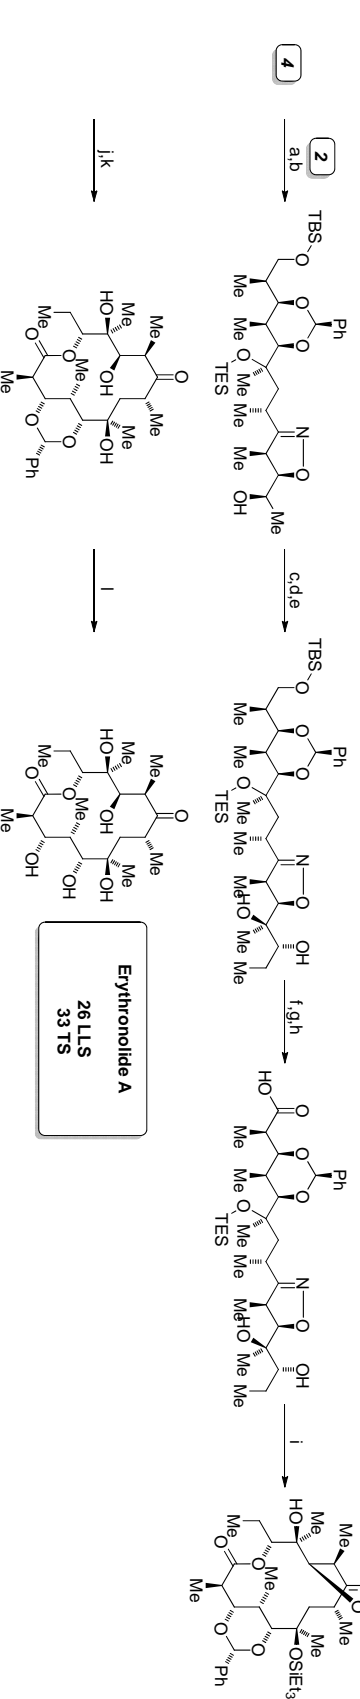

Erythronolide A  
 26 LLS  
 33 TS

# Erythronolide B (Corey, *J. Am. Chem. Soc.* 1978, 100, 5620.)

S11

## Fragment 1

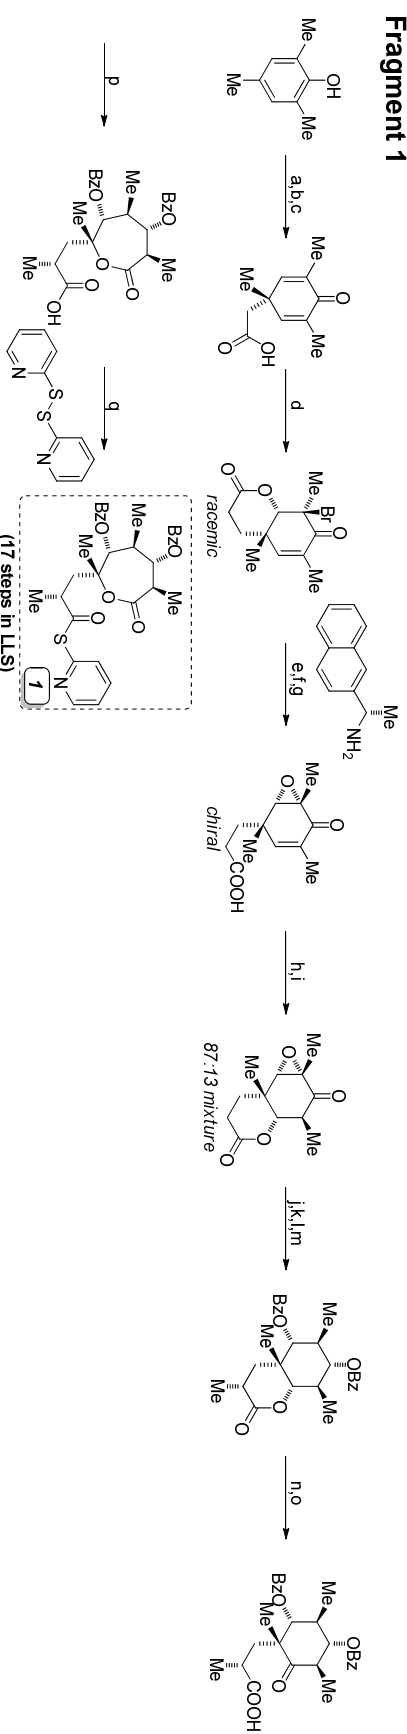

## Fragment 2

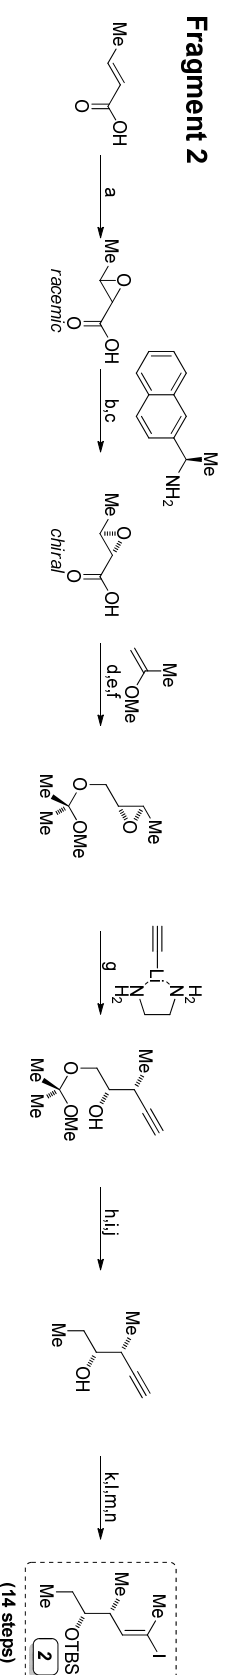

## Coupling Fragment 1 and 2

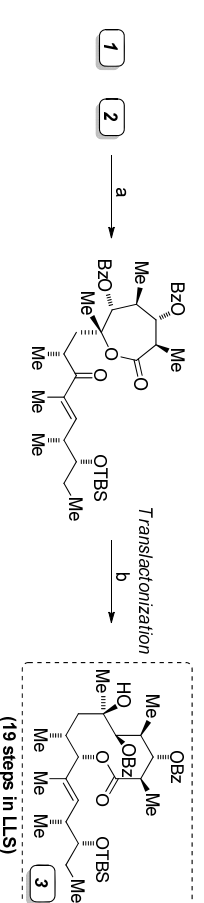

**Erythronolide B** (Corey, *J. Am. Chem. Soc.* **1978**, *100*, 5620.) (continued)

**End Game**

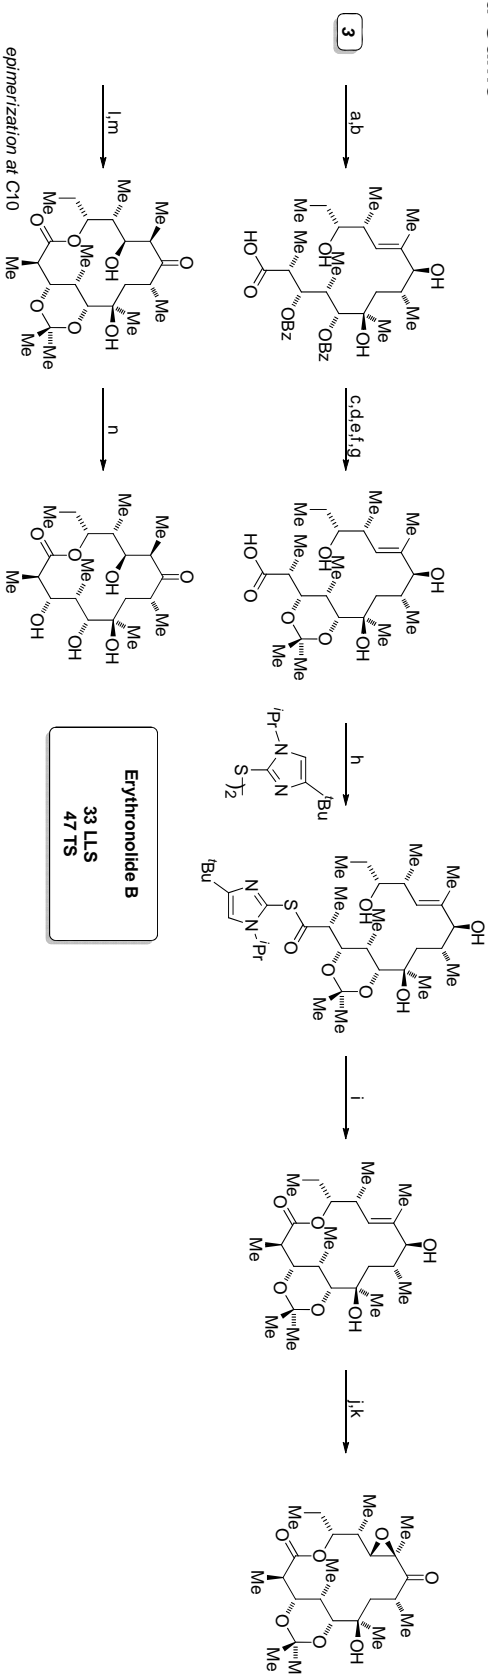

Key: (a) AcOH; (b) LiOH, H<sub>2</sub>O<sub>2</sub>; (c) KOH; (d) CH<sub>2</sub>N<sub>2</sub>; (e) HBr; (f) Me<sub>2</sub>C(OMe)<sub>2</sub>; Amberlite-50; (g) KOH; (h) PPh<sub>3</sub>; (i) Heating; (j) MnO<sub>2</sub>; (k) H<sub>2</sub>O<sub>2</sub>; NaOH; (l) H<sub>2</sub>; Pd/C; (m) K<sub>2</sub>CO<sub>3</sub>; (n) HCl

**Erythronolide B** (Kochetkov, *Tetrahedron Lett.* **1987**, 28, 3835.)

S13

**Fragment 1**

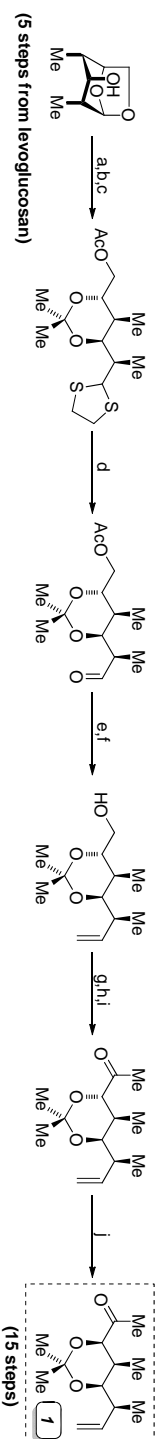

Key: (a) HS(CH<sub>2</sub>)<sub>2</sub>SH, BF<sub>3</sub>·OEt<sub>2</sub>; (b) Ac<sub>2</sub>O·Py; (c) DMP-Me<sub>2</sub>CO, TsOH; (d) HgCl<sub>2</sub>, CaCO<sub>3</sub>; (e) Ph<sub>3</sub>P=CH<sub>2</sub>; (f) MeONa, MeOH; (g) (COCl)<sub>2</sub>, DMSO, TEA; (h) MeMgCl; (i) (COCl)<sub>2</sub>, DMSO, TEA; (j) K<sub>2</sub>CO<sub>3</sub>, MeOH

**Fragment 2**

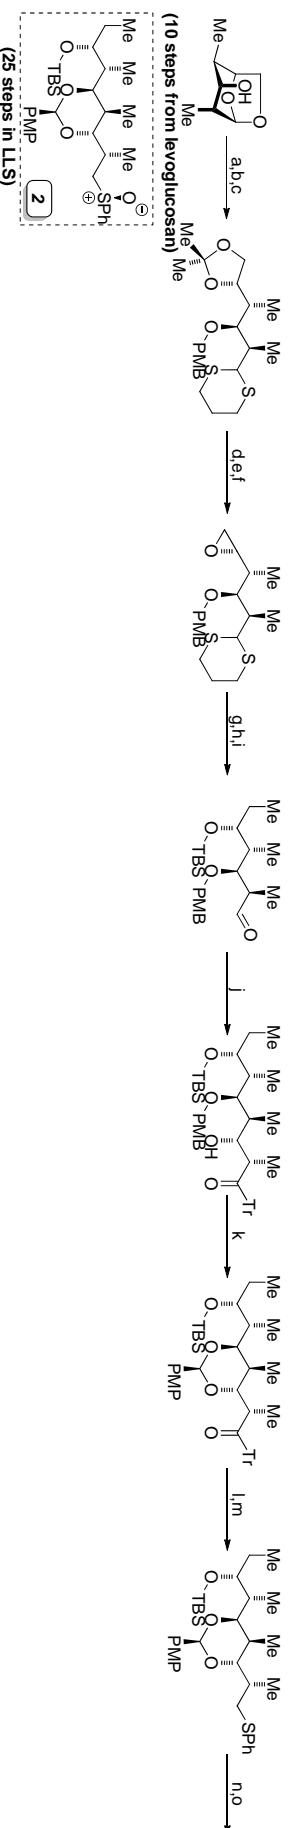

Key: (a) HS(CH<sub>2</sub>)<sub>2</sub>SH, BF<sub>3</sub>·OEt<sub>2</sub>; (b) DMP-Me<sub>2</sub>CO, TsOH; (c) NaH, PMBCH; (d) AcOH, H<sub>2</sub>O; (e) TsCl, Py; (f) K<sub>2</sub>CO<sub>3</sub>, MeOH; (g) MeMgCl, CuCl·Me<sub>2</sub>S, THF; (h) *t*-BuPh<sub>2</sub>SiCl<sub>4</sub>, TEA; (i) HgCl<sub>2</sub>-CaCO<sub>3</sub>; (j) C<sub>2</sub>H<sub>5</sub>COTf, BuLi; (k) DDQ, 3A MS, DCM; (l) LiHfEt<sub>3</sub>; (m) Ph<sub>2</sub>S<sub>2</sub>, Pbu<sub>3</sub>, Py; (n) MCPBA, FAA; (o) collidine

**Fragment Union and End Game**

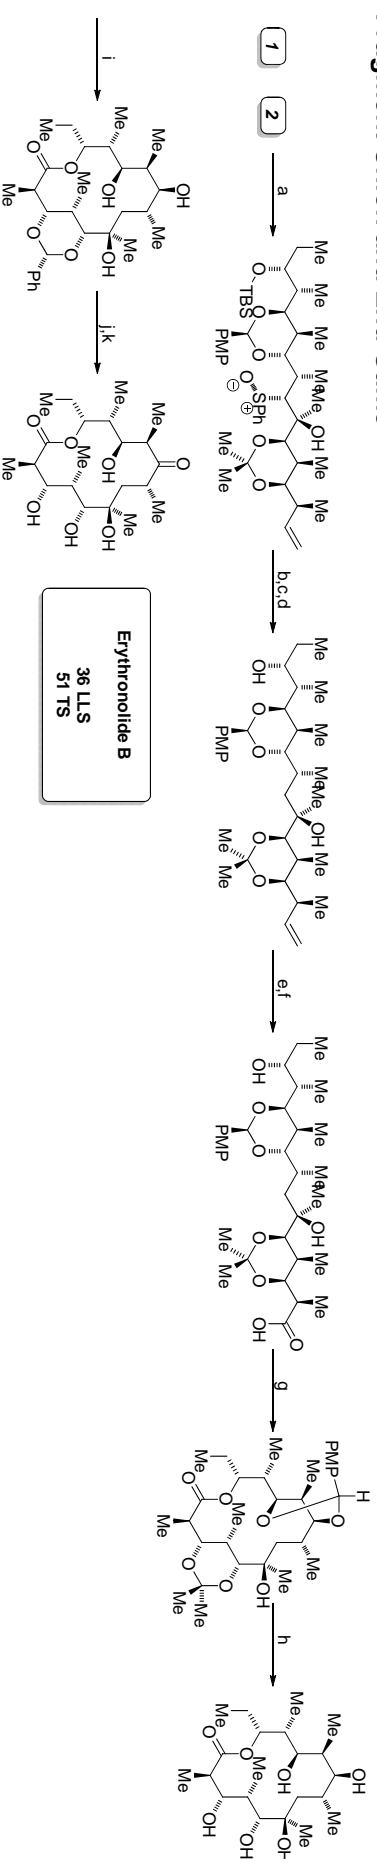

Key: (a) LDA, THF; (b) TFAA, NaI, Me<sub>2</sub>CO; (c) Na, NH<sub>3</sub>; (d) TBAF, THF; (e) O<sub>3</sub>; (f) MCPBA, pH = 7 buffer; (g) 2,2'-dithiodis(4-*t*-bu-*l*-*p*-imidazole), PPh<sub>3</sub>, PhCH<sub>3</sub>; (h) TFA; (i) PhCH(OEt)<sub>2</sub>, CSA; (j) PCC, 3A MS; (k) AcOH, H<sub>2</sub>O

# Erythronolide B (Mulzer, *J. Am. Chem. Soc.* 1991, 113, 910.)

## Chiral Auxiliary and Precursor 1,2

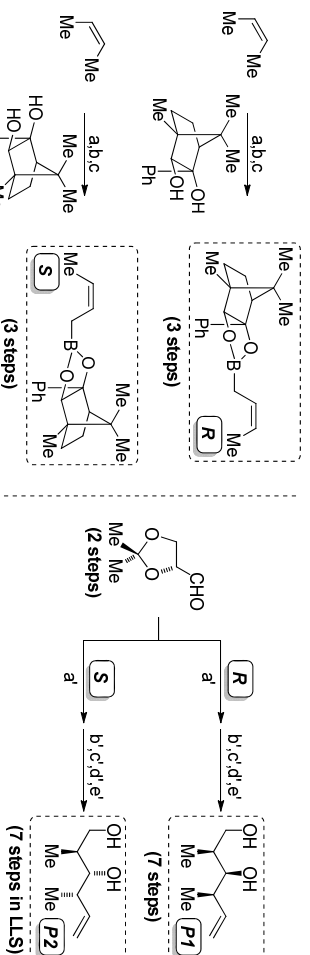

## Fragment 1 and 2

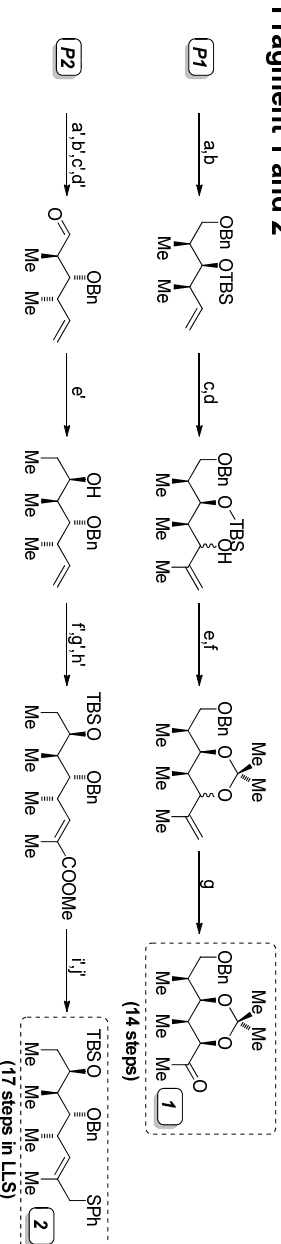

## Fragment Union and End Game

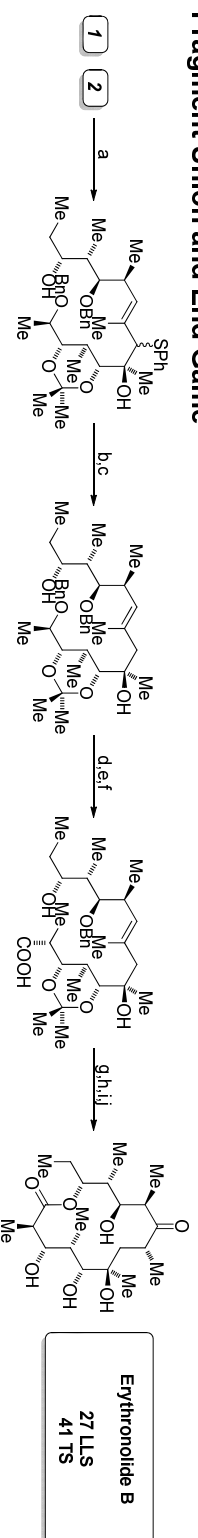

Erythronolide B  
 27 LLS  
 41 TS

**Catalyst and Homologation Reagent**

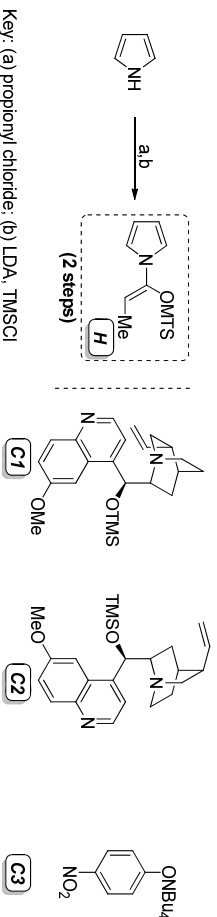

**Fragment 1**

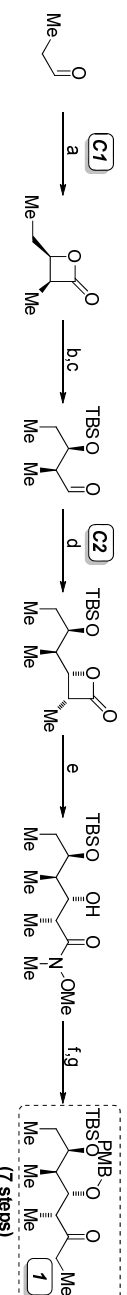

**Fragment 2**

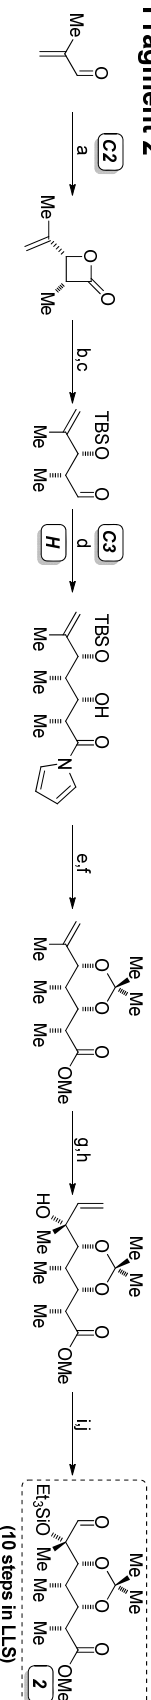

**Fragment Coupling and End Game**

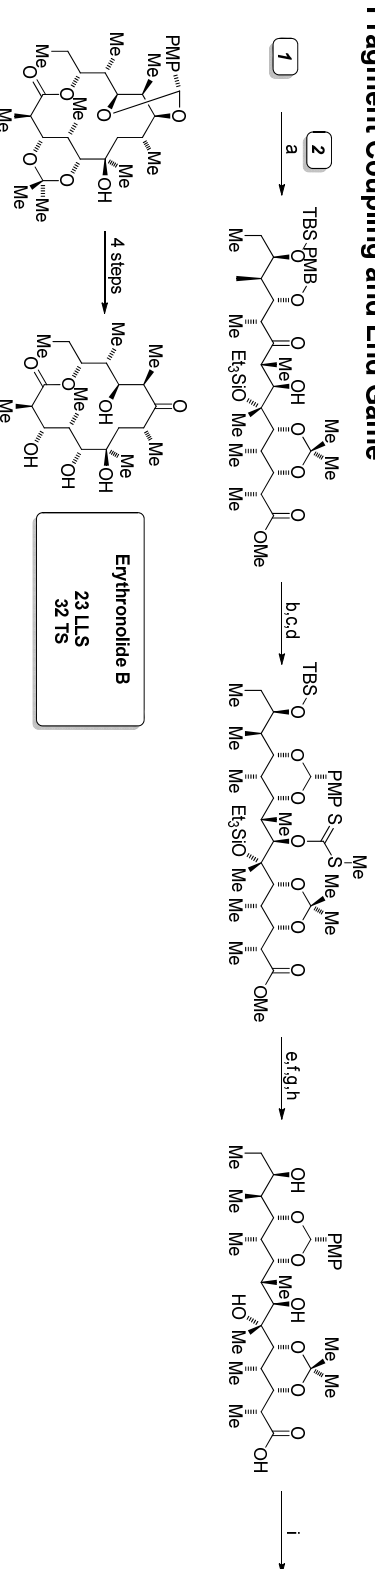

**(9S)-Dihydroerythronolide A** (Stork, *J. Am. Chem. Soc.* **1987**, *109*, 1565.)

S16

**Fragment 1**

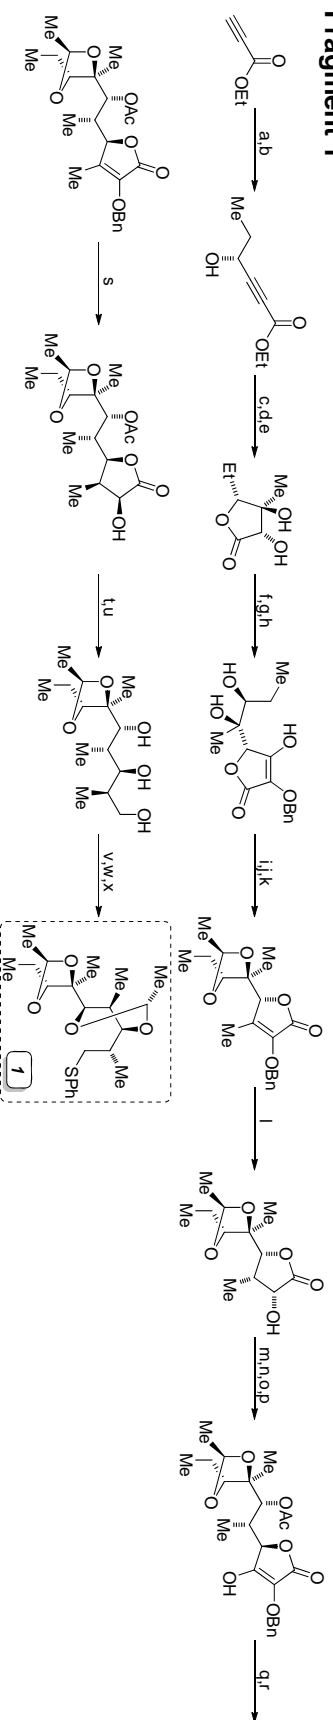

Key: (a) BuLi, propionyl chloride; (b) 9-BBN, (R)-pinene; (c) H<sub>2</sub>C=C(Me)OMe, CSA; (d) dimethylthioacetate, then add: (e) OsO<sub>4</sub>, NMO; (f) TMSCl, imid.; (g) LHMDS, EtOC(O)CH<sub>2</sub>OBN; (h) K<sub>2</sub>CO<sub>3</sub>; (i) MeCH(OMe)<sub>2</sub>, CSA; (j) (PhO)<sub>2</sub>P(O)Cl, Na<sub>2</sub>CO<sub>3</sub>, TBAF; (k) Me<sub>2</sub>Zn, Ni(tacac)<sub>2</sub>; (l) H<sub>2</sub>, Pd/C; (m) TMSNMe<sub>2</sub>; (n) LHMDS, EtOC(O)CH<sub>2</sub>OBN; (o) K<sub>2</sub>CO<sub>3</sub>; (p) Ac<sub>2</sub>O, TEA, DMAP; (q) (PhO)<sub>2</sub>P(O)Cl, Na<sub>2</sub>CO<sub>3</sub>, TBABF; (r) Me<sub>2</sub>Zn, Ni(tacac)<sub>2</sub>; (s) Ru/Alumina, H<sub>2</sub>; (t) LAH, HOAc, HIO<sub>4</sub>; (u) NaBH<sub>4</sub>; (v) CH<sub>3</sub>C(OEt)<sub>3</sub>, PPTS; (w) BH<sub>3</sub>·THF; (x) (PhS)<sub>2</sub>, PPh<sub>3</sub>

**Fragment 2**

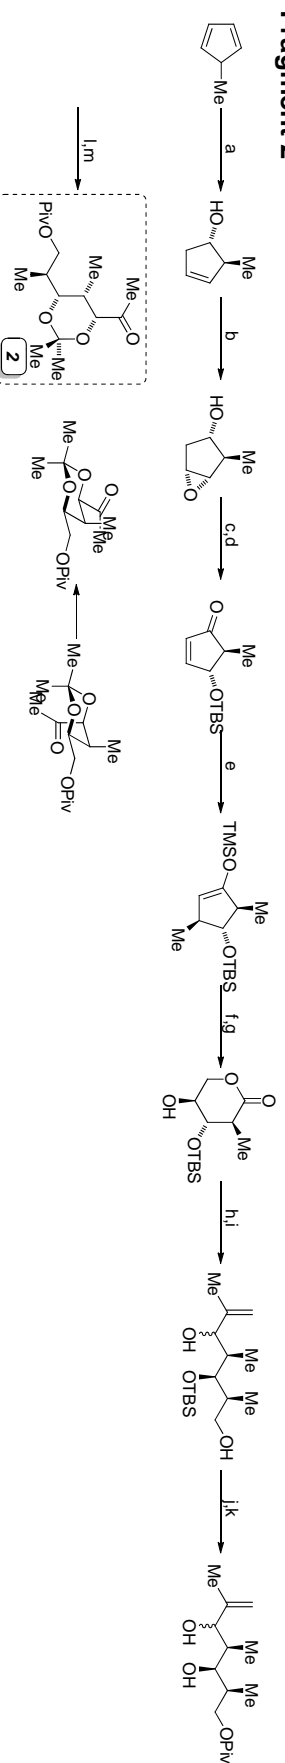

Key: (a) (R)-pinene, BH<sub>3</sub>·THF, then H<sub>2</sub>O<sub>2</sub>; (b) VO(acac)<sub>2</sub>; (c) CrO<sub>3</sub>, H<sub>2</sub>SO<sub>4</sub>; (d) NEt<sub>3</sub>, then TBSCl, DMAP; (e) LiCuMe<sub>2</sub>, then TMSCl; (f) O<sub>3</sub>, NaBH<sub>4</sub>; (g) 2N HCl; (h) DIBAL-H; (i) 2-propenyl lithium; (j) TBAF; (k) PyCl, DMAP, TEA; (l) Me<sub>2</sub>C(OMe)<sub>2</sub>, PPTS; (m) O<sub>3</sub>, PPh<sub>3</sub>

**Fragment Union**

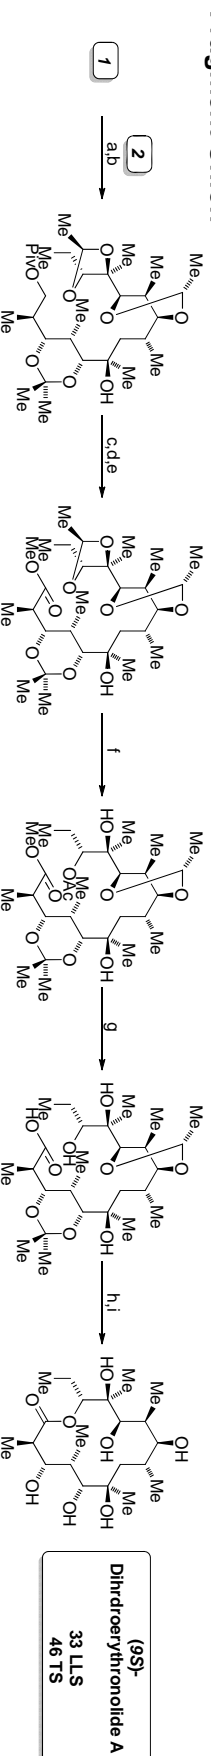

Key: (a) 4,4'-dibutylbiphenyl, Li; (b) MgBr<sub>2</sub>; (c) MeLi; (d) PDC; (e) Me<sub>2</sub>SO<sub>4</sub>; (f) O<sub>3</sub>; (g) KOH, aq. MeOH; (h) DCC, DMAP, refluxing chloroform; (i) HCl



***(9S)*-Dihydroerythronolide A (Yonemitsu, *Tetrahedron Lett.* 1987, 28, 4569.)**

S17

**Fragment 1**

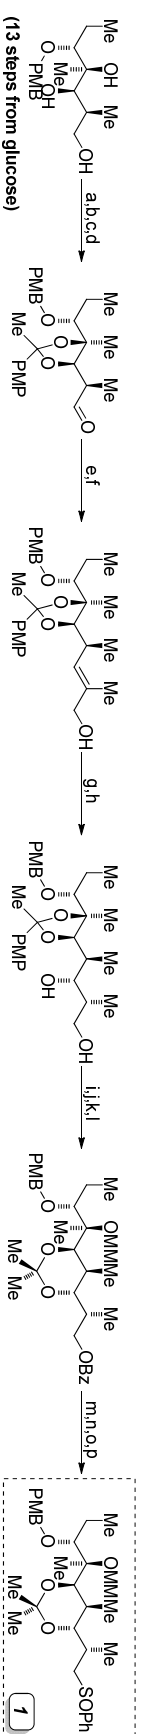

Key: (a) BzCl, Py; (b) PMPCMe(OMe)<sub>2</sub>, CSA; (c) 1N KOH, MeOH; (d) (COCl)<sub>2</sub>, DMSO, TEA; (e) Ph<sub>3</sub>P=CMeCO<sub>2</sub>Et, EDC; (f) LAH; (g) mCPBA; (h) NaBH<sub>3</sub>CN, BF<sub>3</sub>·OEt<sub>2</sub>; (i) BzCl, Py; (j) 4N HCl; (k) CH<sub>2</sub>=C(Me)OMe, PPTS; (l) MMCl, *i*-Pr<sub>2</sub>NEt; (m) 1N NaOH; (n) TSCl, TEA, DMAP; (o) PhSiNa, EtOH; (p) NaIO<sub>4</sub>

**Fragment 2**

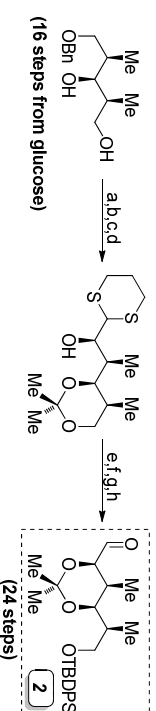

Key: (a) Me<sub>2</sub>C(OMe)<sub>2</sub>, CSA; (b) 10% Pd-C, H<sub>2</sub>; (c) PCC, 4A MS; (d) HSi(CH<sub>3</sub>)<sub>2</sub>SH, Bulli; (e) TSCl; (f) TBSPSCl, imid.; (g) CH<sub>2</sub>=C(Me)OMe, PPTS; (h) MeI, NaHCO<sub>3</sub>

**Fragment Union and Macrocyclization**

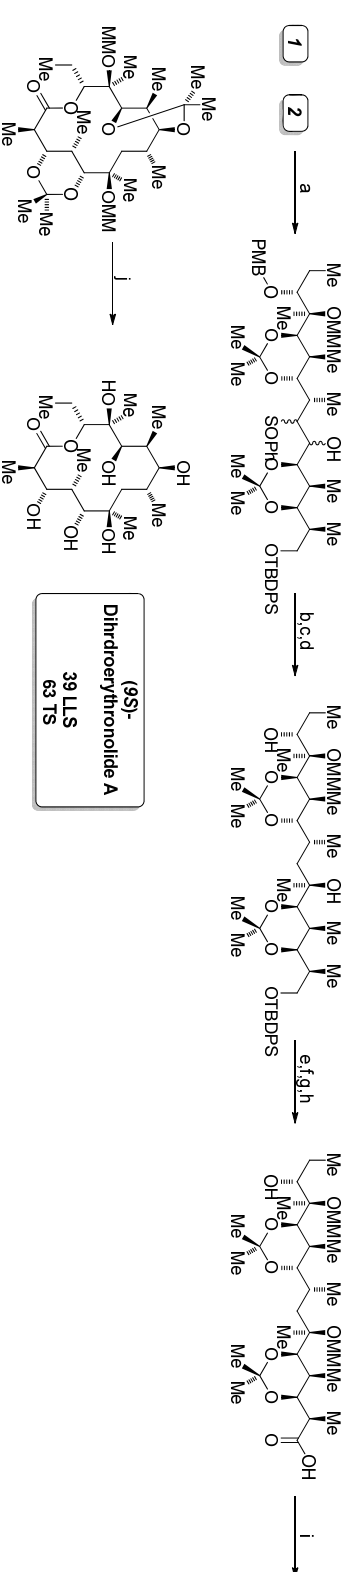

Key: (a) LDA; (b) Raney Ni; (c) (COCl)<sub>2</sub>, DMSO, TEA; (d) MeI; (e) MMCl, *i*-Pr<sub>2</sub>NEt; (f) TBAF; (g) Jones reagent; (h) 10% Pd/C, H<sub>2</sub>; (i) 2,4,6-Cl<sub>3</sub>-C<sub>6</sub>H<sub>2</sub>COCl, TEA, then DMAP; (j) 50% HOAc

**(9S)-Dihydroerythronolide A** (Paterson, *Tetrahedron Lett.* 1989, 30, 7463.)

**Precursor 1 and 2**

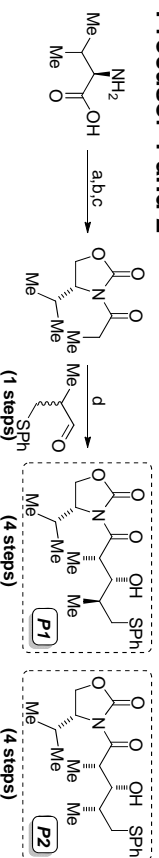

Key: (a) NaBH<sub>4</sub>, i<sub>2</sub>; (b) K<sub>2</sub>CO<sub>3</sub>, diethyl carbonate; (c) BuLi, then propionyl chloride; (d) Bu<sub>2</sub>BOTf, Pr<sub>2</sub>NNEt

**Fragment 1 and 2**

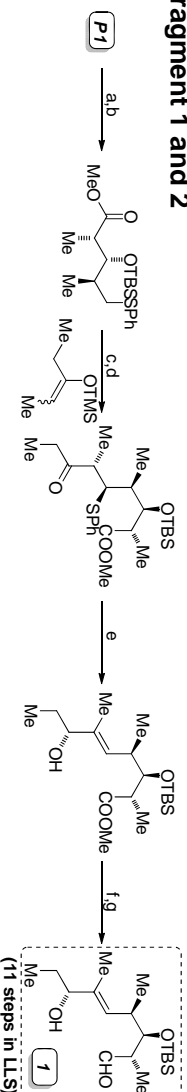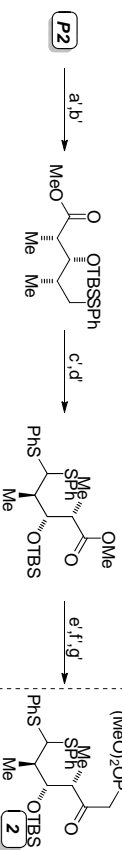

Key: (a) NaOMe; (b) TBSOTf, 2,6-lutidine; (c) NCS; (d) ZnBr<sub>2</sub>; (e) NaIO<sub>4</sub>; (f) (+)-N-methylphenadrine, N-ethylamine, LAH; (g) DIBAL-H  
(a) NaOMe; (b) TBSOTf, 2,6-lutidine; (c) NCS; (d) PhSSiMe<sub>3</sub>, ZnBr<sub>2</sub>; (e) BuLi; (f) (+)-N-methylphenadrine, N-ethylamine, LAH; (g) DIBAL-H

**Fragment Union and Macrocyclization**

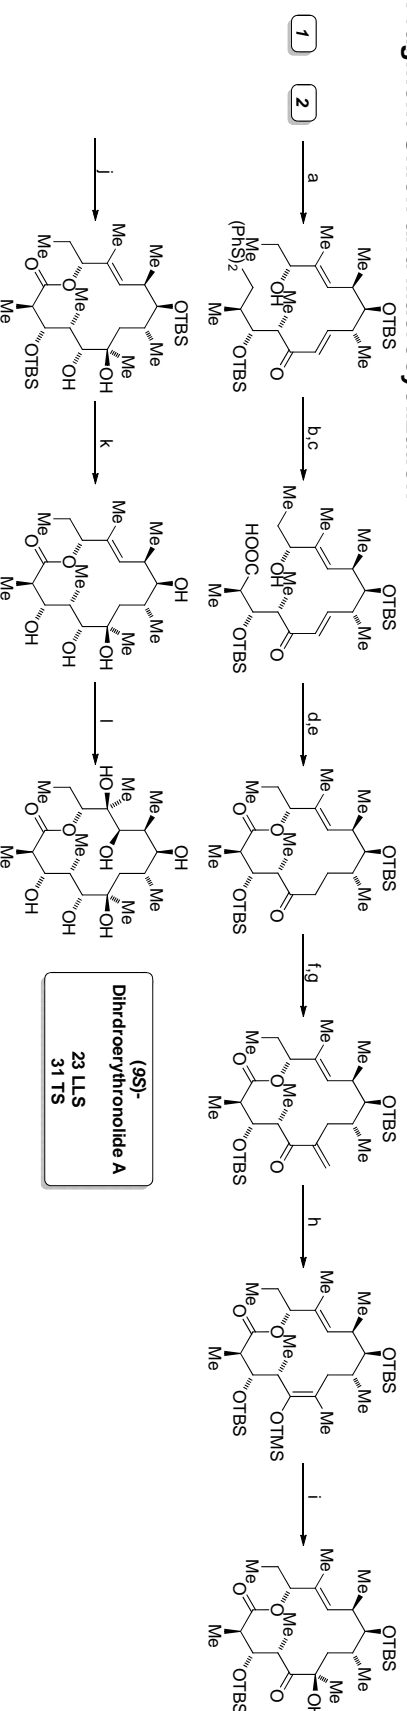

**(9S)-  
23 LLS  
31 TS  
Dihydroerythronolide A**

Key: (a) Pr<sub>2</sub>NEt, LiCl; (b) HgO, aq. HBr; (c) NaClO<sub>2</sub>, 2-methyl-2-butene, NaH<sub>2</sub>PO<sub>4</sub>; (d) 2,4,6-trichlorobenzoyl chloride, TEA, then DMAP; (e) H<sub>2</sub>, Rh/Al<sub>2</sub>O<sub>3</sub>; (f) LDA, CH<sub>2</sub>O; (g) MsCl, TEA, then DBU; (h) L-selectride, then TMSCl; (i) OsO<sub>4</sub>, NMO, quinuclidine; (j) Zn(BH<sub>4</sub>)<sub>2</sub>; (k) 40% aq. HF; (l) OsO<sub>4</sub>, NMO, then Na<sub>2</sub>S<sub>2</sub>O<sub>5</sub>

### Chiral Auxiliary

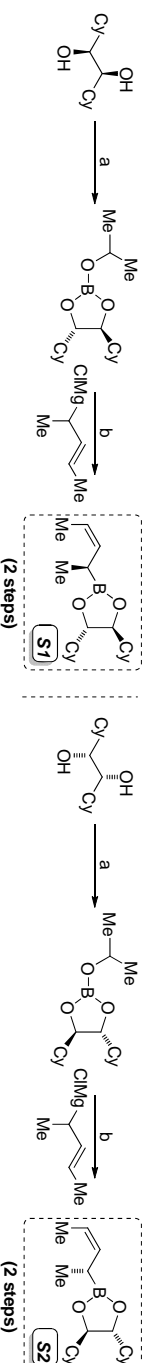

Key: (a) *i*-PrOH; (b) THF, 0°C

### Iterative Crotylation

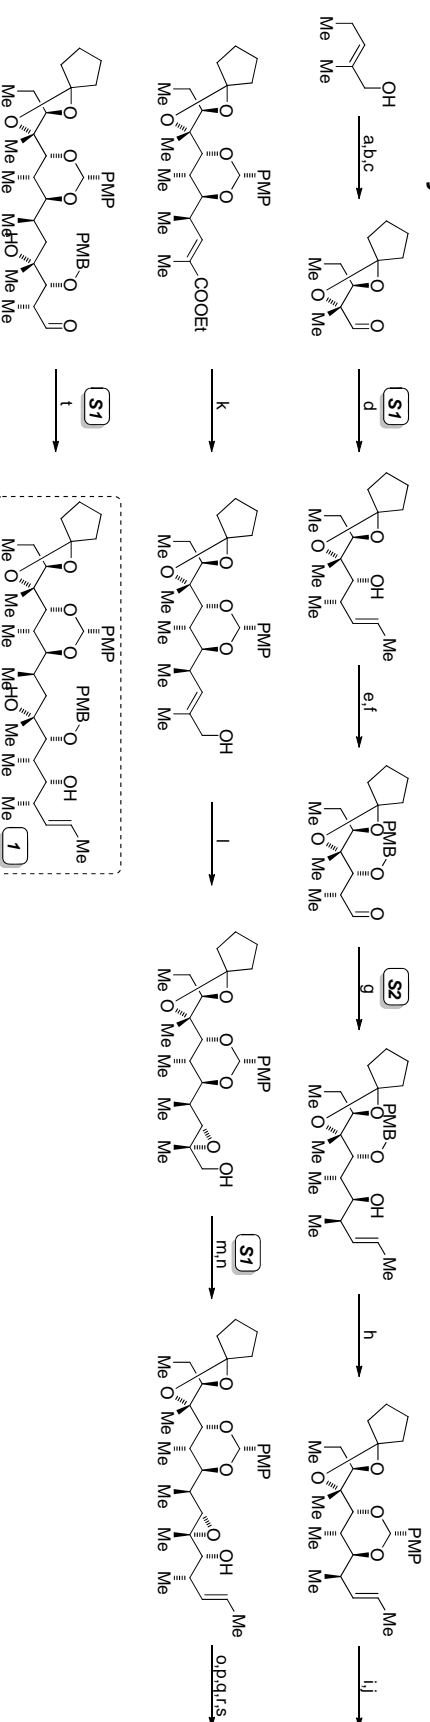

Key: (a) (+)-dimethyl tartrate,  $\text{Ti}(\text{O}i\text{Pr})_4$ ,  $t\text{Bu}_2\text{O}_2$ ; (b)  $(\text{COCl})_2$ , TEA, DMSO; (c)  $\text{SnCl}_4$ , cyclopentanone; (d) 3d, benzene, 80°C; (e) NaH, PMBCl; (f)  $\text{O}_3$ ,  $\text{PPh}_3$ ; (g) pet. ether, 2d; (h) DDQ; (i)  $\text{O}_3$ ,  $\text{PPh}_3$ ; (j)  $\text{Ph}_3\text{PCH}(\text{CH}_3)\text{COOEt}$ ; (k) LAH; (l)  $t\text{BuOH}$ , (+)-dimethyl tartrate,  $\text{Ti}(\text{O}i\text{Pr})_4$ ; (m) NMO, TFAP; (n) 10 kbar, pet. ether; 3d; (o) *i*-PrMgCl; (p) LAH; (q) PMBCl, NaH; (r) NMO,  $\text{OsO}_4$ ; (s)  $\text{NaIO}_4$ ; (t) 10 kbar, pet. ether; 3d

### End Game

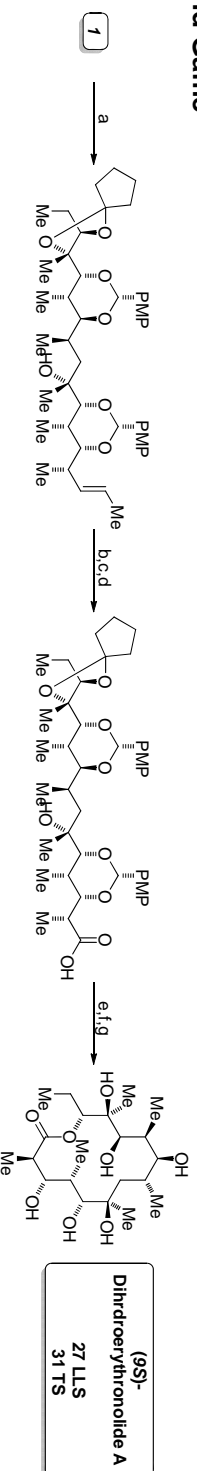

Key: (a) DDQ; (b) NMO,  $\text{OsO}_4$ ; (c)  $\text{NaIO}_4$ ; (d)  $\text{CrO}_3$ , acetone; (e) TNT, 2N HCl; (f) 2,4,6-trichlorobenzoyl chloride, TEA, then DMAP; (g) 2N HCl

# (9S)-Dihydroerythronolide A (Woerpel, *J. Am. Chem. Soc.* 2003, 125, 6018.)

## Allylsilane and Auxiliary Synthesis

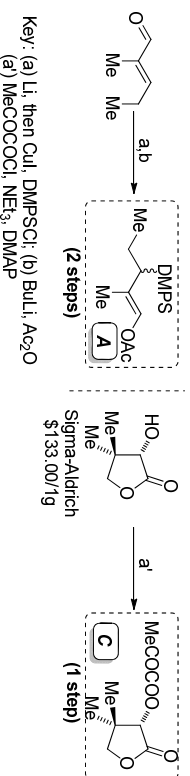

## Common Precursor 1

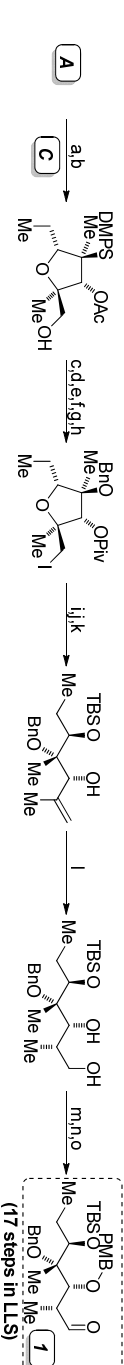

## Fragment Union

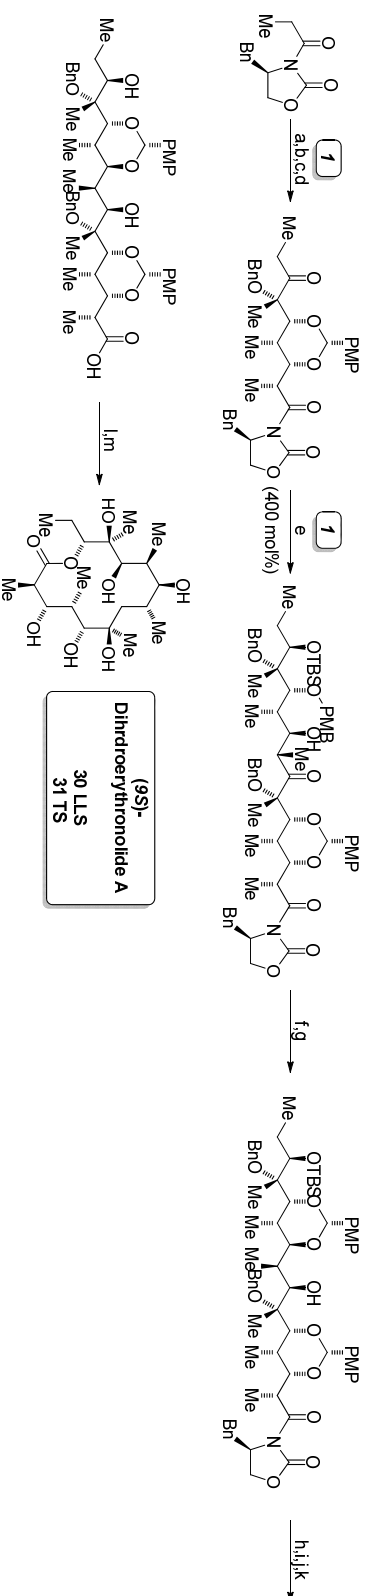

(9S)-  
Dihydroerythronolide A  
30 LLS  
31 TS

# 6-Deoxyerythronolide B (Masamune, *J. Am. Chem. Soc.* **1981**, *103*, 1568.)

## Auxiliary Preparation

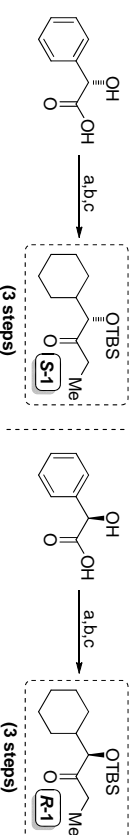

Key: (a) Rh/Al<sub>2</sub>O<sub>3</sub>; (b) EtLi, -78 °C; (c) TBSOTf, 2,6-lutidine

## Fragment 1

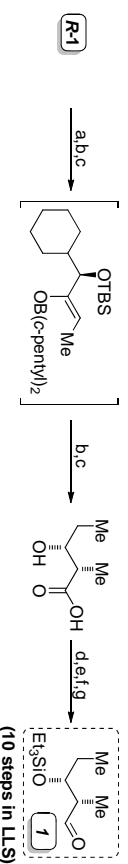

Key: (a) c-pentylBOTf, *i*-Pr<sub>2</sub>NEt, then acetyl aldehyde; (b) HF-MeCN; (c) NaIO<sub>4</sub>; (d) CH<sub>2</sub>N<sub>2</sub>; (e) TESCl, DMAP; (f) DIBAL-H; (g) CrO<sub>3</sub>•2Py

## Fragment 2

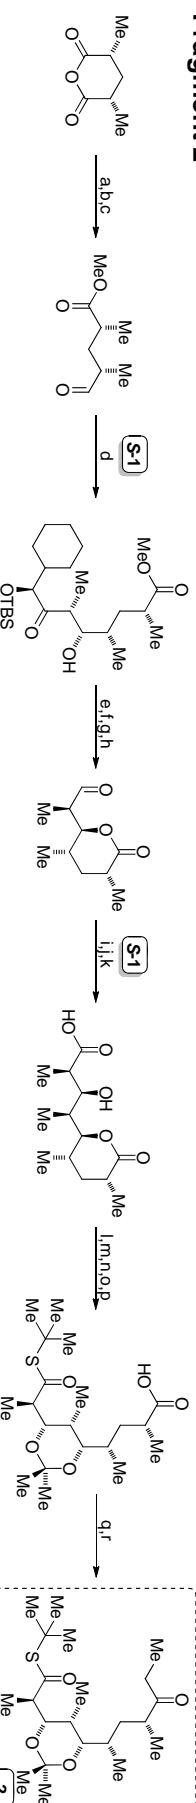

Key: (a) lipase, MeOH; (b) (COCl)<sub>2</sub>; (c) Pd-BaSO<sub>4</sub>, H<sub>2</sub>; (d) **S-1**, c-pentylBOTf, *i*-Pr<sub>2</sub>NEt; (e) HF-MeCN; (f) NaIO<sub>4</sub>; (g) (COCl)<sub>2</sub>; (h) Pd-BaSO<sub>4</sub>, H<sub>2</sub>; (i) **S-1**, c-pentylBOTf, *i*-Pr<sub>2</sub>NEt; (j) TBAF; (k) NaIO<sub>4</sub>; (l) ClCO<sub>2</sub>Et, Py; (m) TISfBu, HSFbu;

## End Game

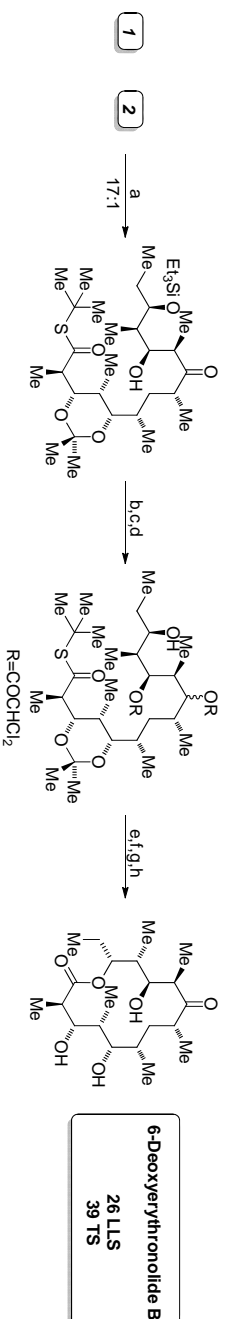

Key: (a) LHMDS; (b) NaBH<sub>4</sub>, MeOH; (c) (CHCl<sub>2</sub>CO)<sub>2</sub>O, Py; (d) HOAc; (e) CuOTf, *i*-Pr<sub>2</sub>NEt; (f) KOH, H<sub>2</sub>O/THF/MeOH; (g) PCC; (h) TFA, MeCN/H<sub>2</sub>O

## 6-Deoxyerythronolide B (Danishesky, *J. Org. Chem.* 1990, 55, 1636.)

S22

### Danishesky Diene Preparation

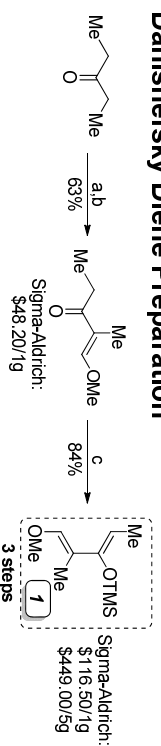

Key: (a) NaH, then ethyl formate; (b) TsOH, reflux; (c) TMSOTf, TEA

### Iterative Lewis Acid Catalyzed Diene Aldehyde Condensation

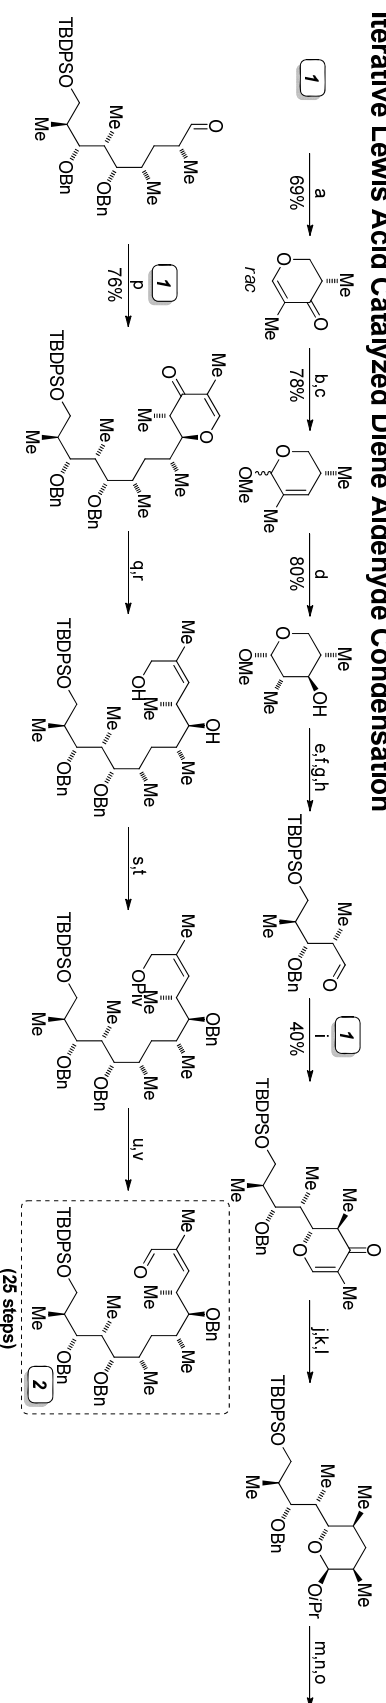

Key: (a) ZnCl<sub>2</sub>, formaldehyde; (b) CeCl<sub>3</sub>, NaBH<sub>4</sub>; (c) TsOH; (d) BH<sub>3</sub>•SMe<sub>2</sub>; (e) 1,3-propanedithiol, TiCl<sub>4</sub>; (f) TBDPSCO, TEA; (g) NaH, BnBr, TBAI; (h) NBS, NaHCO<sub>3</sub>; (i) ZnCl<sub>2</sub>, BF<sub>3</sub>•OEt<sub>2</sub>; (j) CeCl<sub>3</sub>, NaBH<sub>4</sub>; (k) TsOH, *i*-PrOH; (l) Pd/A<sub>2</sub>O<sub>5</sub>, H<sub>2</sub> (50 psi); (m) 1,3-propanedithiol, TiCl<sub>4</sub>; (n) NaH, BnBr, TBAI; (o) NBS, acetone; (p) ZnCl<sub>2</sub>, BF<sub>3</sub>•OEt<sub>2</sub>; (q) CeCl<sub>3</sub>, NaBH<sub>4</sub>; (r) TsOH, then LiBH<sub>4</sub>; (s) PivCl, TEA; (t) BnCN(NH)OCCl<sub>3</sub>, TIOH; (u) LAH; (v) Dess-Martin periodate

### End Game

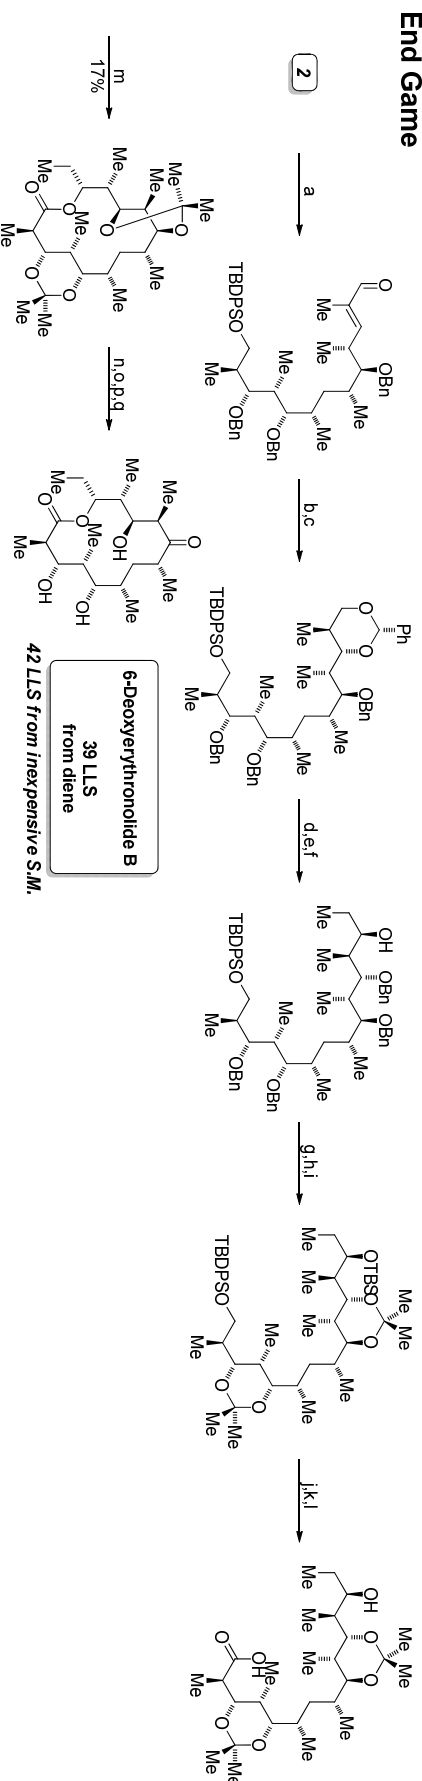

42 LLS from inexpensive S.M.

Key: (a) PhSH, Bulli; (b) BH<sub>3</sub>•SMe<sub>2</sub>; (c) PhCH(OMe)<sub>2</sub>, PPTS; (d) DIBAL-H; (e) Dess-Martin periodate; (f) EMG/Br; (g) TBSOTf, TEA; (h) LiNH<sub>2</sub>; (i) (MeO)<sub>2</sub>CH<sub>2</sub>, CSA; (j) TBAF, reflux; (k) RuCl<sub>2</sub>(PPh<sub>3</sub>)<sub>3</sub>; (l) 2-methyl-2-butene, NaH<sub>2</sub>PO<sub>4</sub>, NaClO<sub>2</sub>; (m) TFA, 2,4,6-trichlorobenzoyl chloride, then DMAF; (n) CSA; (o) (MeO)<sub>2</sub>CH<sub>2</sub>, CSA; (p) PCC; (q) TFA, MeCN/H<sub>2</sub>O

**6-Deoxyerythronolide B** (Evans, *Tetrahedron Lett.* **1997**, 38, 53; *J. Am. Chem. Soc.* **1998**, 120, 5921.)

**Chiral Auxiliary Synthesis**

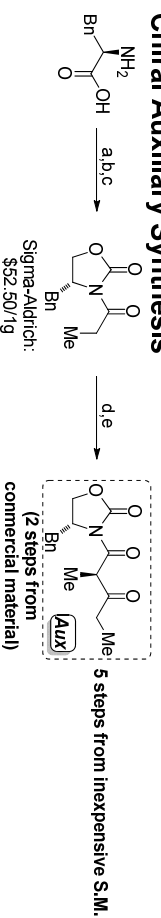

**Fragment 1**

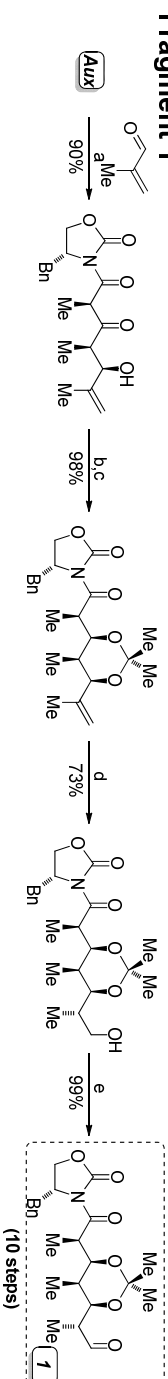

**Fragment 2**

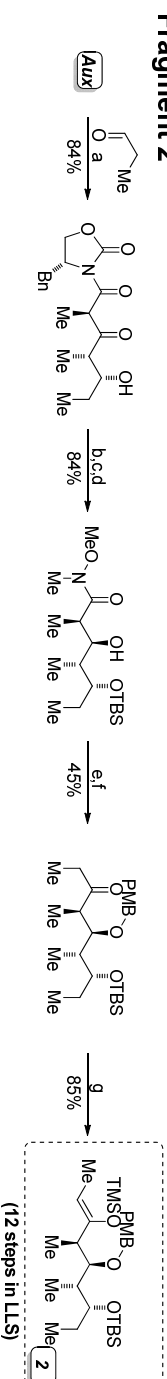

**End Game**

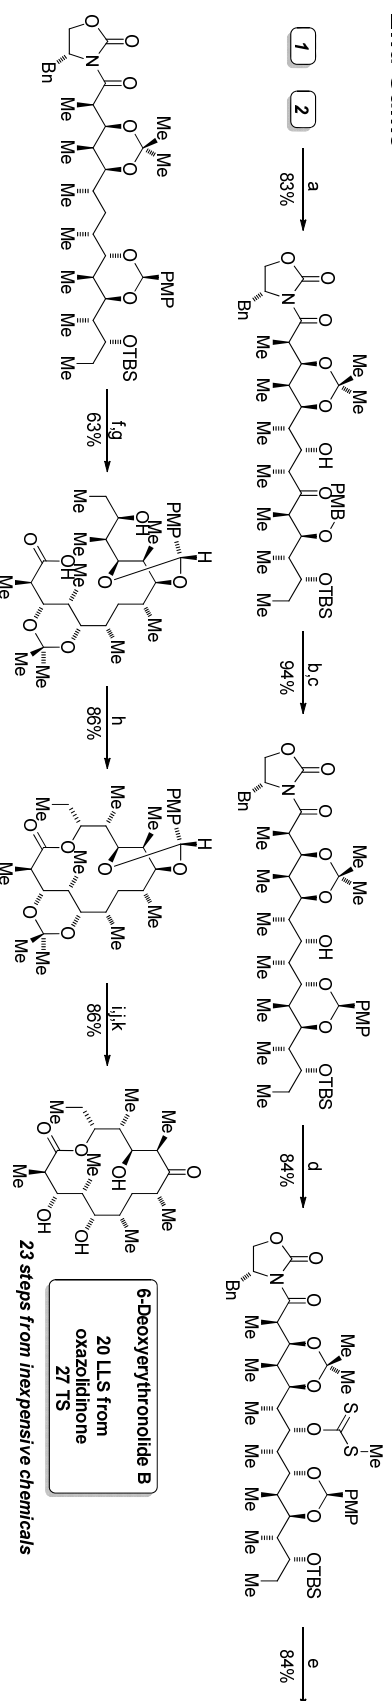

## 6-Deoxyerythronolide B (Crimmins, *Org. Lett.* 2006, 8, 2191.)

S24

### Chiral Auxiliary Synthesis

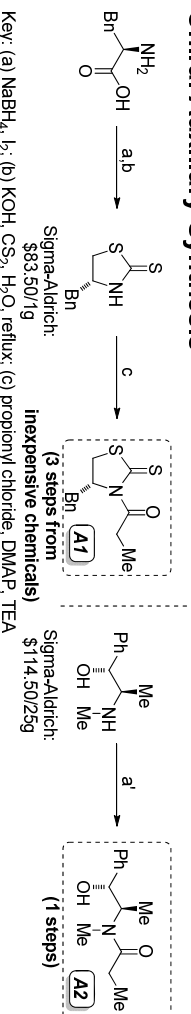

### Iterative Aldol Addition

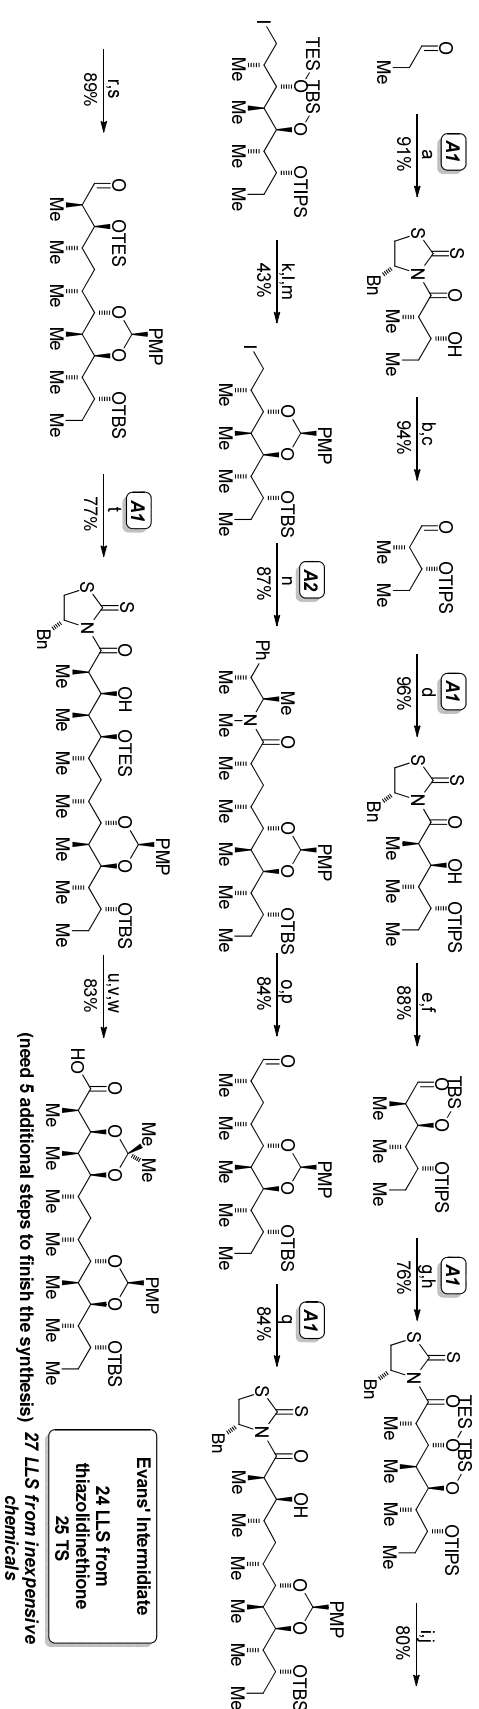

Key: (a)  $\text{TiCl}_4$ ,  $\text{Pr}_2\text{NEt}$ , then propionaldehyde; (b) TIPSOt, 2,6-lutidine; (c) DIBAL; (d)  $\text{TiCl}_4$ , (-)-sparteine, NMP; (e) TBSOTf, 2,6-lutidine; (f) DIBAL-H; (g)  $\text{TiCl}_4$ ,  $\text{Pr}_2\text{NEt}$ ; (h) TBSOTf, 2,6-lutidine; (i)  $\text{LiBH}_4$ ; (j)  $\text{PPh}_3$ ; (k)  $\text{TsOH}$ , MeOH; (l)  $p\text{-MeOC}_6\text{H}_4\text{CHO}$ , CSA; (m) TBSOTf, 2,6-lutidine; (n) LDA, LiCl; (o) LDA,  $\text{BH}_3\cdot\text{NH}_3$ ; (p) Dess-Martin periodate; (q)  $\text{TiCl}_4$ , (-)-sparteine, NMP; (r) TBSOTf, 2,6-lutidine; (s) DIBAL-H; (t)  $\text{TiCl}_4$ , (-)-sparteine, NMP; (u) HF-Fy, (v)  $(\text{MeO})_2\text{CMe}_2$ , CSA; (w) LiOH



# 6-Deoxyerythronolide B (White, *Nature Chem.* 2009, 1, 547.)

## Chiral Auxiliary Synthesis

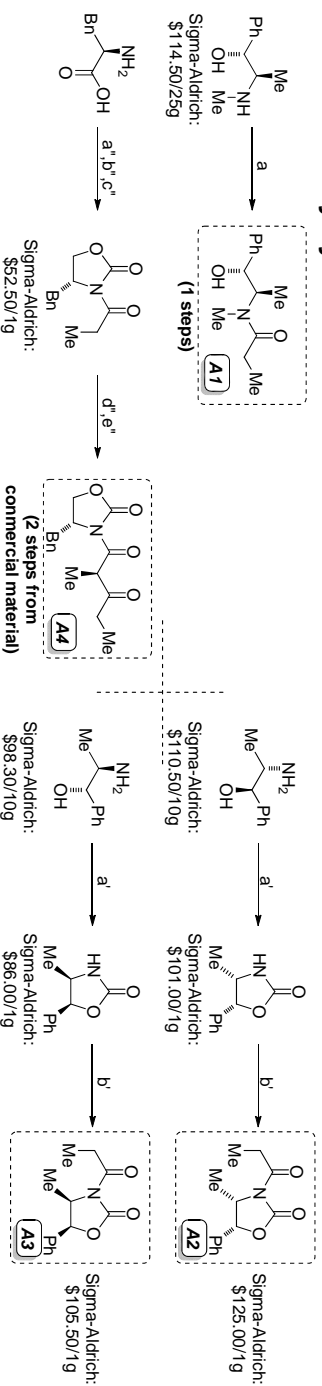

## C-H Macrolactonization Precursor

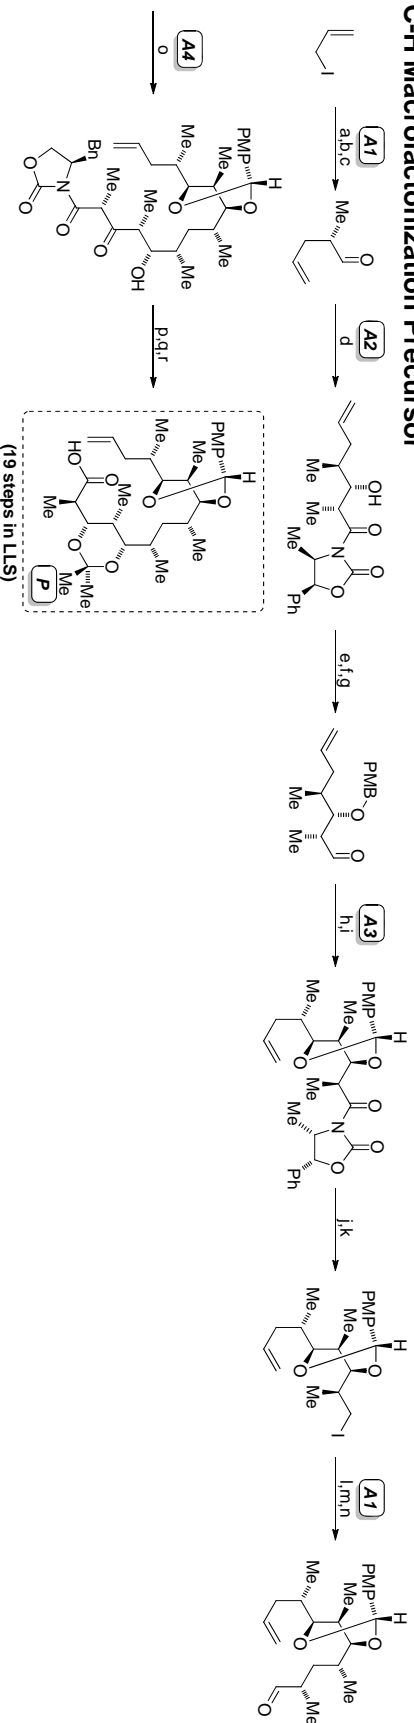

## End Game: C-H Macrolactonization

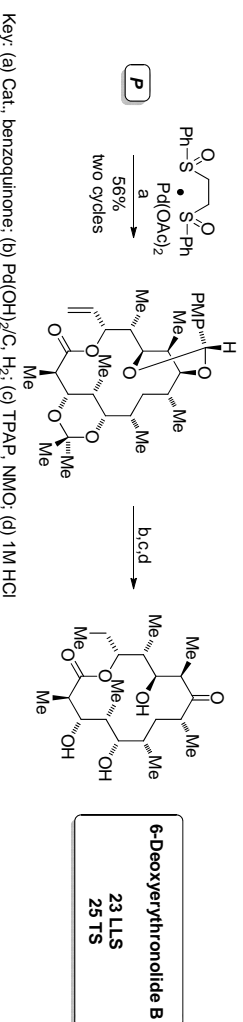

## **General Methods**

All reactions were run under an atmosphere of Argon. Tetrahydrofuran (THF), ether and toluene were distilled from sodium and benzophenone. Anhydrous solvents were transferred by an oven-dried syringe. Sealed tubes (13x100 mm) were purchased from Fischer Scientific and were dried in an oven overnight and cooled under a stream of nitrogen prior to use. Commercially available  $\alpha$ -methylallyl acetate (Aldrich) was purified by distillation prior to use. Cesium carbonate was purchased from Alfa Aesar and was used directly without further purification. Isopropanol (Fisher) was purified by distillation prior to use. Analytical thin-layer chromatography (TLC) was carried out using 0.2-mm commercial silica gel plates (DC-Fertigplatten Kieselgel 60 F<sub>254</sub>). Infrared spectra were recorded on a Perkin-Elmer 1600 spectrometer. High-resolution mass spectra (HRMS) were obtained on a Karatos MS9 and are reported as  $m/z$  (relative intensity). Accurate masses are reported for the molecular ion (M+H, M or M-H) or a suitable fragment ion. Nuclear magnetic resonance spectra (<sup>1</sup>H-NMR 400 MHz and <sup>13</sup>C-NMR 100 MHz) spectra were recorded with a Varian Gemini spectrometer for CDCl<sub>3</sub> solutions and chemical shifts are reported as parts per million (ppm) relative to residual CHCl<sub>3</sub> $\delta$ <sub>H</sub> (7.26 ppm) and CDCl<sub>3</sub> $\delta$ <sub>C</sub> (77.0 ppm), respectively, as internal standards. Coupling constants are reported in Hertz (Hz).

## **Preparation of (S)-I**

To a mixture of [Ir(cod)Cl]<sub>2</sub> (87.3 mg, 0.13 mmol, 100 mol%), (S)-SEGPHOS (159 mg, 0.26 mmol, 200 mol%), Cs<sub>2</sub>CO<sub>3</sub> (169 mg, 0.52 mmol, 400 mol%), 4-CN-3-NO<sub>2</sub>BzOH (100 mg, 0.52 mmol, 400 mol%) and allyl acetate (65 mg, 0.65 mmol, 500 mol%) in a sealed tube under an atmosphere of N<sub>2</sub> was added THF (2.6 mL, 0.05 M). The reaction mixture was stirred for 30 minutes at ambient temperature and heated for 1.5 hours at 80 °C. Upon cooling to ambient temperature, the reaction mixture was diluted with CH<sub>2</sub>Cl<sub>2</sub> (10 mL), filtered through a celite plug, washed with CH<sub>2</sub>Cl<sub>2</sub> (50 mL) and concentrated *in vacuo*. The residue was purified by flash chromatography (SiO<sub>2</sub>, 20% Et<sub>2</sub>O/CH<sub>2</sub>Cl<sub>2</sub>) and concentrated *in vacuo*. The light yellow gum was dissolved in THF (3 mL). Rapid addition of hexanes (50 mL) to the stirred solution resulted in precipitation of a bright yellow powder, which was collected by gravity filtration. Removal of trace solvents *in vacuo* delivered (S)-I (228 mg, 0.221 mmol) in 85% yield.

## Procedure and Spectral Data for Acid Fragment Synthesis (Fragment B)

### **(3*S*,4*S*,6*S*,7*S*)-3,5,7-Trimethylnona-1,8-diene-4,6-diol**

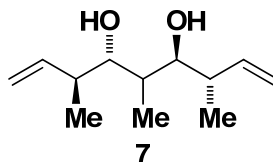

An oven-dried sealed tube under an atmosphere of N<sub>2</sub> was charged with 2-methyl-1,3-propanediol (2.163 g, 24.0 mmol, 100 mol%), (*S*)-**I** (620.4 mg, 0.60 mmol, 2.5 mol%), Na<sub>2</sub>CO<sub>3</sub> (5.088 g, 48.0 mmol, 200 mol%), H<sub>2</sub>O (1.73 mL, 96.0 mmol, 400 mol%) and THF (24.0 mL, 1.0 M). Freshly distilled crotyl acetate (15.12 mL, 120.0 mmol, 500 mol%) was added and the mixture was allowed to stir at 70 °C for 96 hr. The reaction mixture was concentrated *in vacuo*. Purification of the residue by column chromatography (SiO<sub>2</sub>; ethyl acetate: hexanes, 1:10) provides the title compound (2.427 g, 12.24 mmol) as an colorless viscous oil which solidified on standing in 51% yield, ≥ 99% ee, 6:1 dr.

**TLC (SiO<sub>2</sub>):** R<sub>f</sub> = 0.31 (ethyl acetate:hexanes, 1:3).

**<sup>1</sup>H NMR**(400 MHz, CDCl<sub>3</sub>): δ5.85-5.73 (m, 2H), 5.15-5.09 (m, 4H), 3.65 (d, *J* = 9.6 Hz, 1H), 3.39-3.37 (m, 1H), 2.80 (s, 1H), 2.54 (d, *J* = 4.0 Hz, 1H), 2.46-2.40 (m, 1H), 2.31-2.25 (m, 1H), 1.89-1.86 (m, 1H), 1.03 (d, *J* = 7.2 Hz, 3H), 1.01 (d, *J* = 6.8 Hz, 1H), 0.94 (d, *J* = 6.8 Hz, 3H).

**<sup>13</sup>C NMR** (100 MHz, CDCl<sub>3</sub>): δ142.2, 141.0, 116.5, 116.0, 79.3, 73.9, 42.3, 42.0, 34.8, 17.2, 16.5, 10.7.

**[α]<sub>D</sub><sup>27</sup>** = -19.0 (c = 0.41, CH<sub>2</sub>Cl<sub>2</sub>).

**MP** = 44-59 °C

**FTIR** (neat): ν 3389, 2970, 2931, 1638, 1459, 1417, 1376, 1325, 1242, 1130, 1085, 1041, 994, 971, 911, 812, 720, 674.

**HRMS:** (CI) Calcd. for C<sub>12</sub>H<sub>23</sub>O<sub>2</sub> [M+H]<sup>+</sup>: 199.1698, Found: 199.1696.

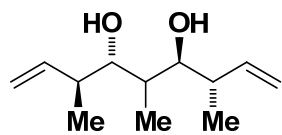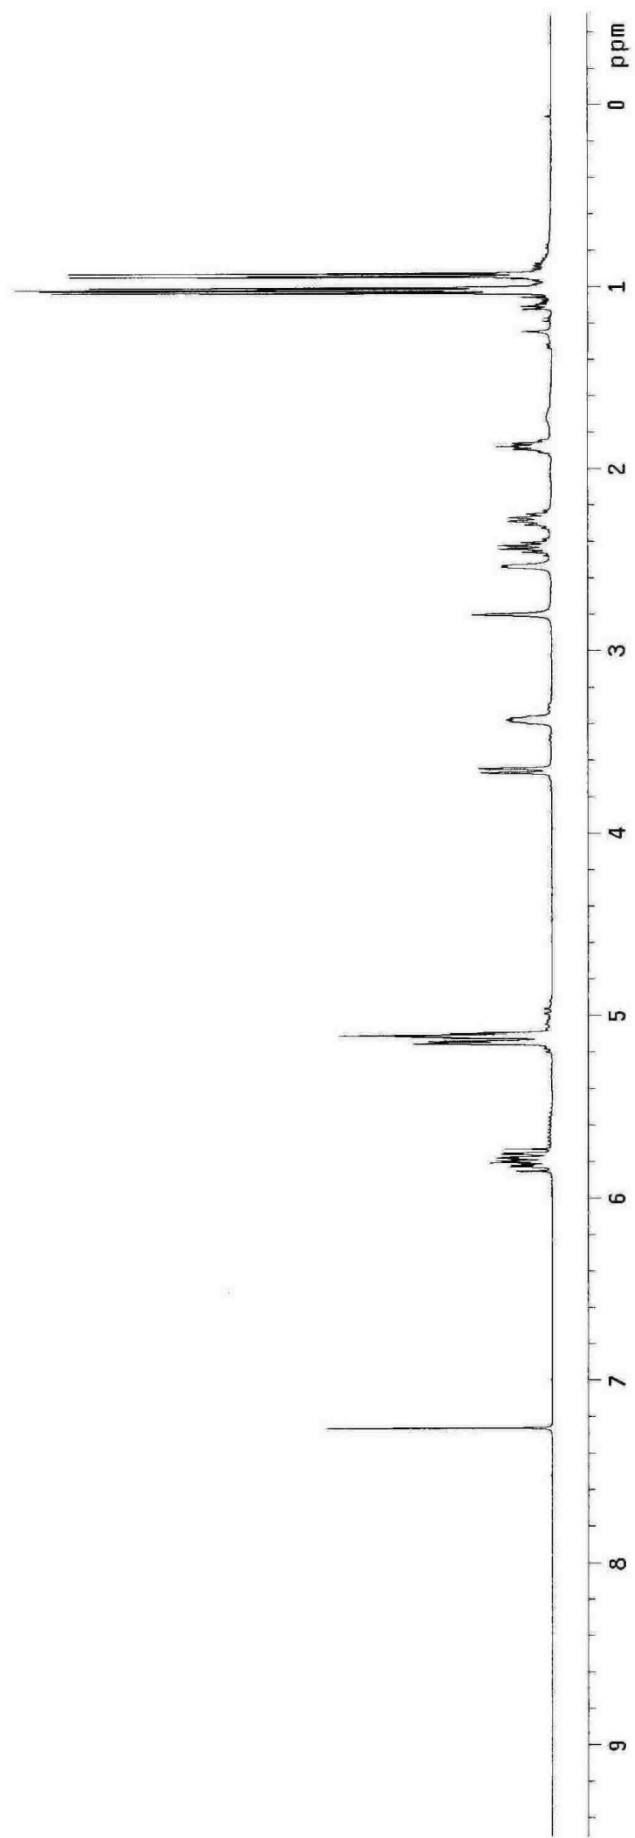

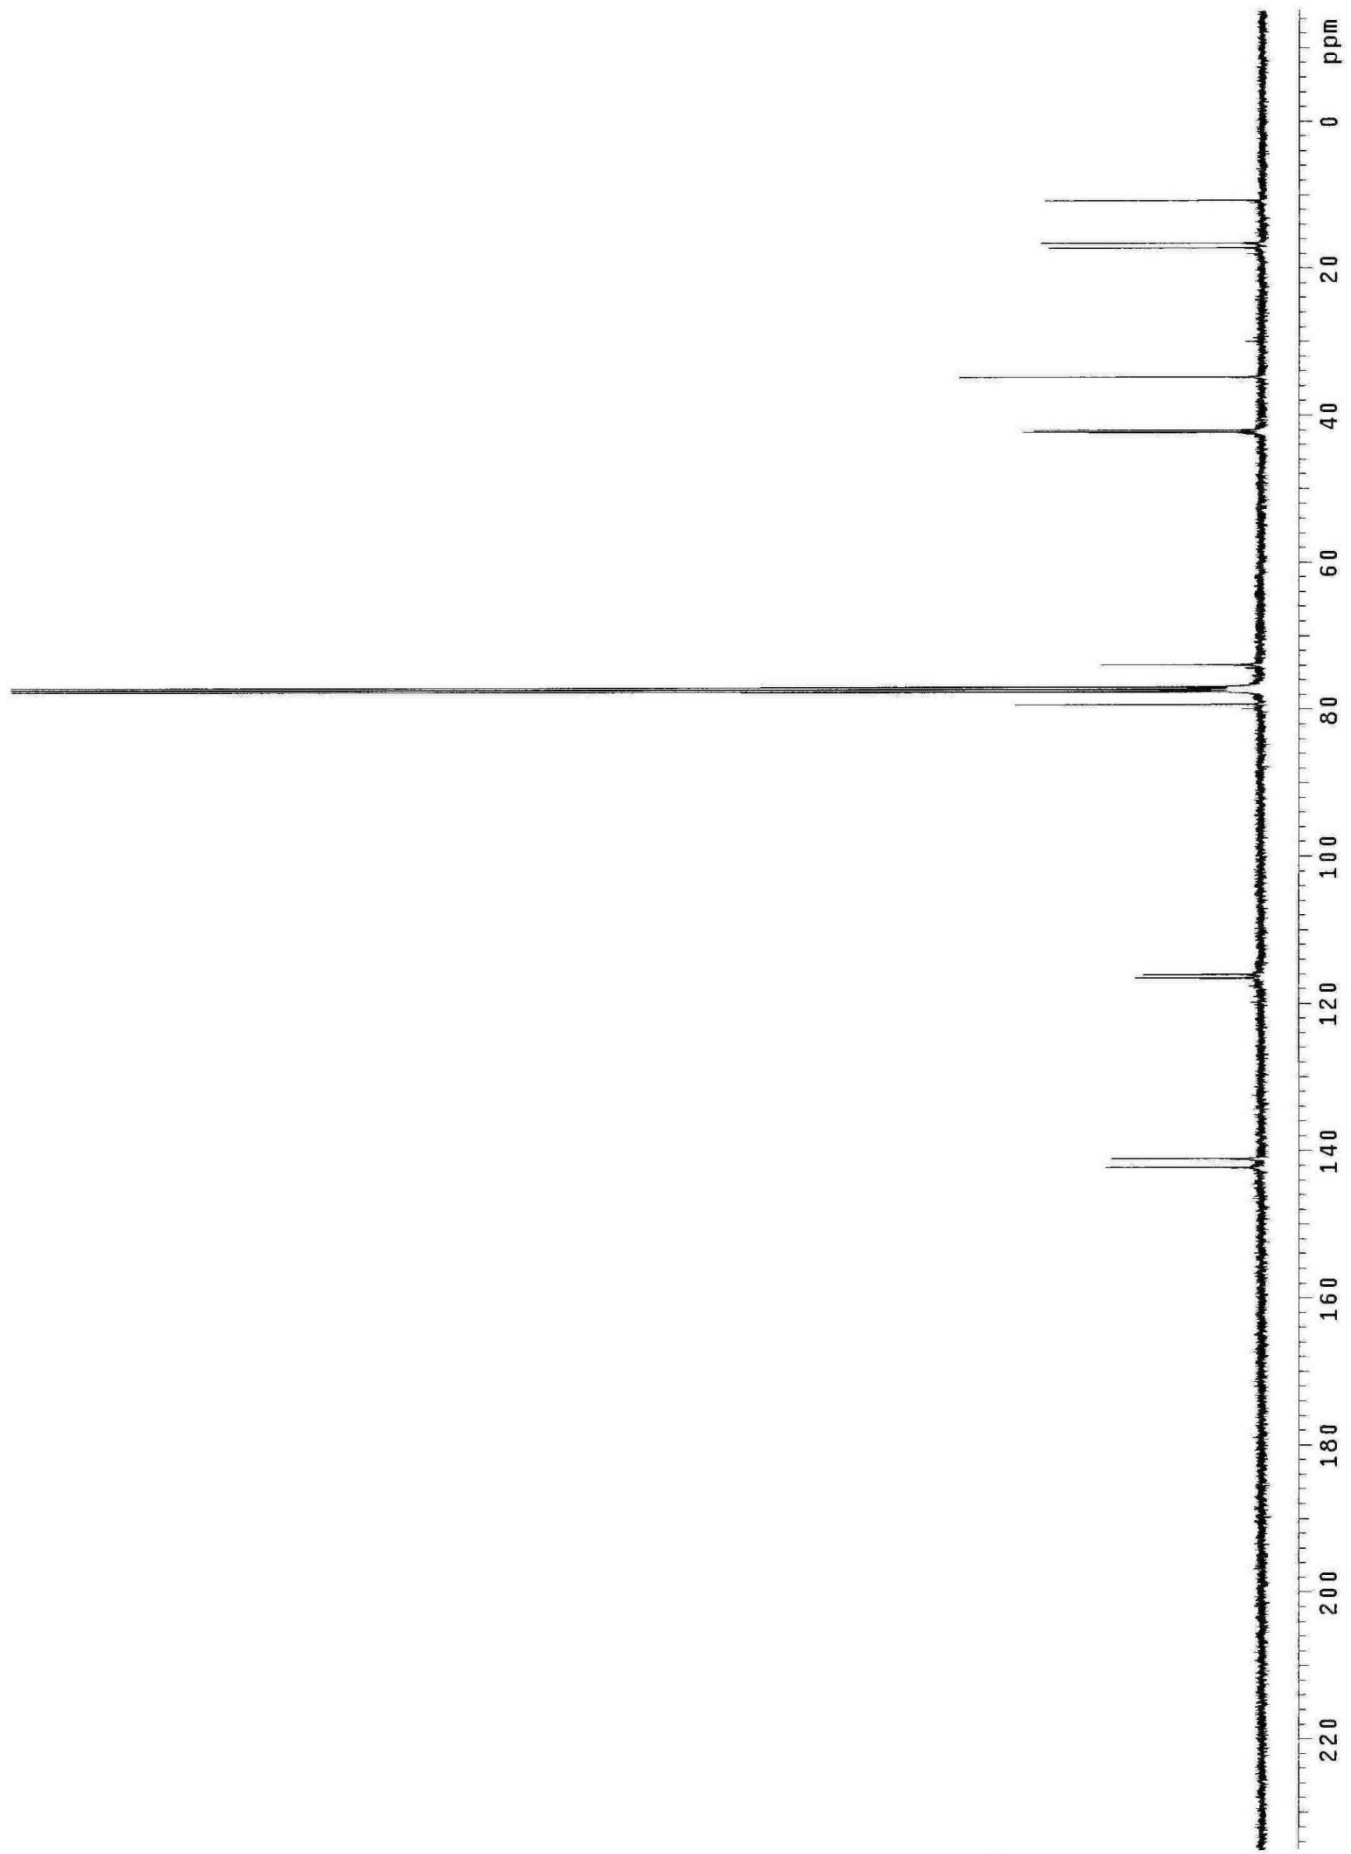

**(2*S*,3*R*,4*R*,5*R*,6*S*)-2-((*S*)-but-3-en-2-yl)-6-(iodomethyl)-3,5-dimethyltetrahydro-2*H*-pyran-4-ol**

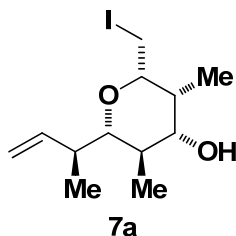

A solution of (3*S*,4*S*,6*S*,7*S*)-3,5,7-trimethylnona-1,8-diene-4,6-diol (535 mg, 2.70 mmol, 100 mol%) and NaHCO<sub>3</sub> (566.6 mg, 6.74 mmol, 250 mol%) in acetonitrile (54.0 mL, 0.05 M) was cooled to -20 °C. To this solution was added iodine (2.054 g, 8.09 mmol, 300 mol%) in one portion. The reaction was stirred at -20 °C for 1 hr. The reaction mixture was warmed to 0 °C and was allowed to stir at this temperature for 6 hr. Saturated aqueous Na<sub>2</sub>S<sub>2</sub>O<sub>3</sub> was added and the reaction mixture was allowed to stir until the solution became colorless. The reaction mixture was transferred to a separatory funnel and the aqueous phase was extracted with ethyl acetate (3 × 30 mL). The combined organic extracts were dried (MgSO<sub>4</sub>), filtered and concentrated under reduced pressure. The residue was purified by flash column chromatography (SiO<sub>2</sub>: ethyl acetate:hexanes, 1:10) to give the title compound (656.5 mg, 2.025 mmol) as a colorless oil in 75% yield, ≥ 99% ee as a single diastereomer.

**TLC (SiO<sub>2</sub>):** R<sub>f</sub> = 0.52 (ethyl acetate:hexanes, 1:3).

**<sup>1</sup>H NMR**(400 MHz, CDCl<sub>3</sub>): δ 5.87-5.78 (m, 1H), 5.02-4.97 (m, 2H), 3.54-3.50 (m, 1H), 3.40 (dd, *J* = 10.8, 4.8 Hz, 1H), 3.25 (dd, *J* = 10.0, 7.6 Hz, 1H), 3.08 (dd, *J* = 10.0, 6.0 Hz, 1H), 2.88 (dd, *J* = 10.0, 2.0 Hz, 1H), 2.44-2.37 (m, 1H), 2.19-2.13 (m, 1H), 1.56-1.49 (m, 1H), 1.16 (d, *J* = 6.8 Hz, 3H), 0.90 (d, *J* = 6.8 Hz, 3H), 0.80 (d, *J* = 6.8 Hz, 1H).

**<sup>13</sup>C NMR**(100 MHz, CDCl<sub>3</sub>): δ 139.2, 115.2, 85.1, 78.7, 76.4, 39.9, 38.2, 34.6, 18.8, 12.2, 6.2, 4.6.

**[α]<sub>D</sub><sup>25</sup>** = +37.2 (c = 0.46, CHCl<sub>3</sub>).

**FTIR** (neat): ν 3350, 3075, 2963, 2925, 2853, 2362, 1640, 1458, 1416, 1372, 1336, 1300, 1271, 1242, 1175, 1091, 1070, 1043, 997, 972, 915, 876, 808, 773, 692, 668.

**HRMS:** (CI) Calcd. for C<sub>12</sub>H<sub>22</sub>O<sub>2</sub>I [M+H]<sup>+</sup>: 325.0665, Found: 325.0667.

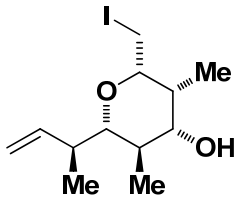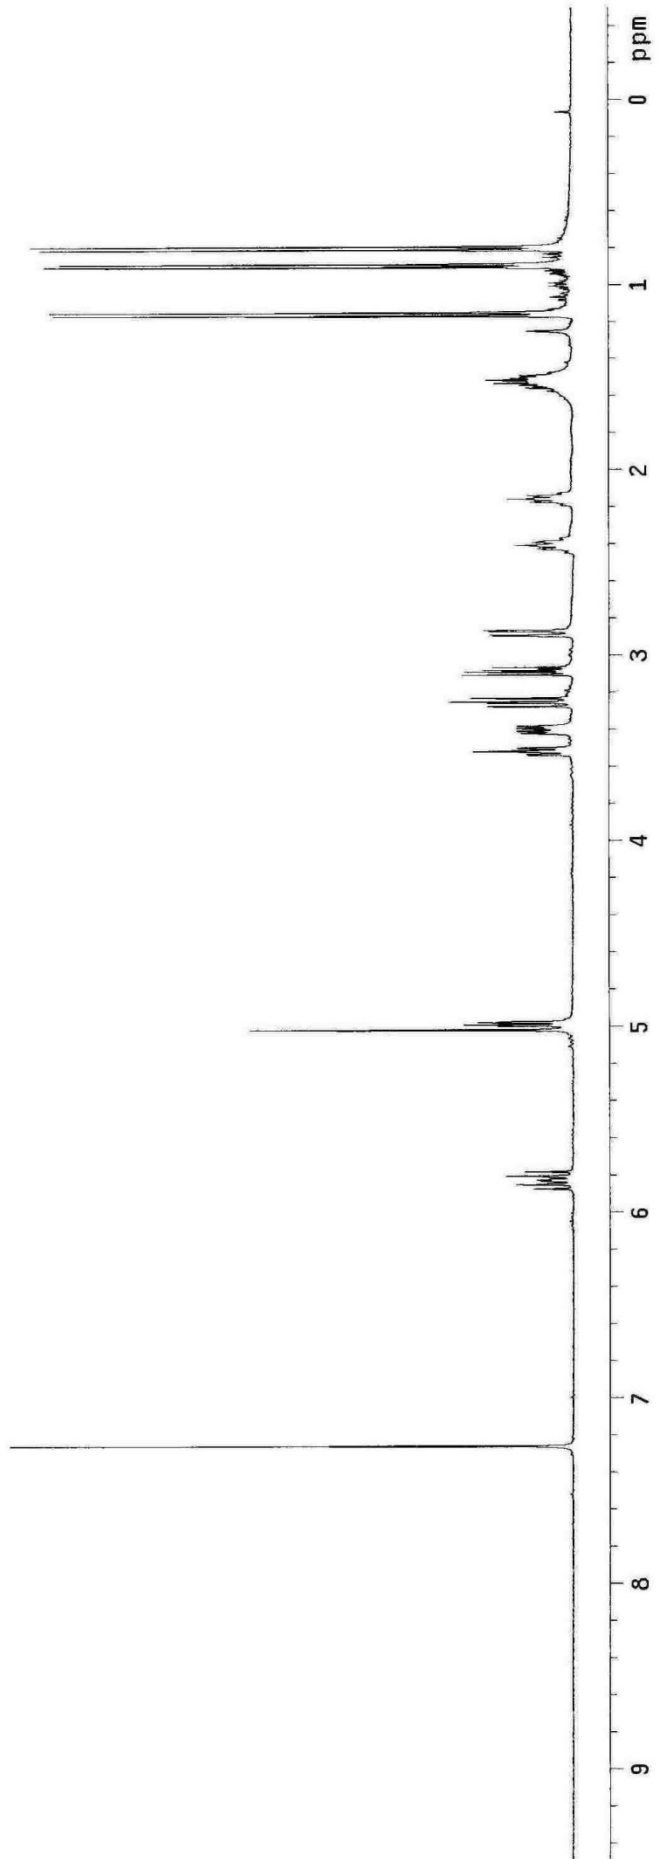



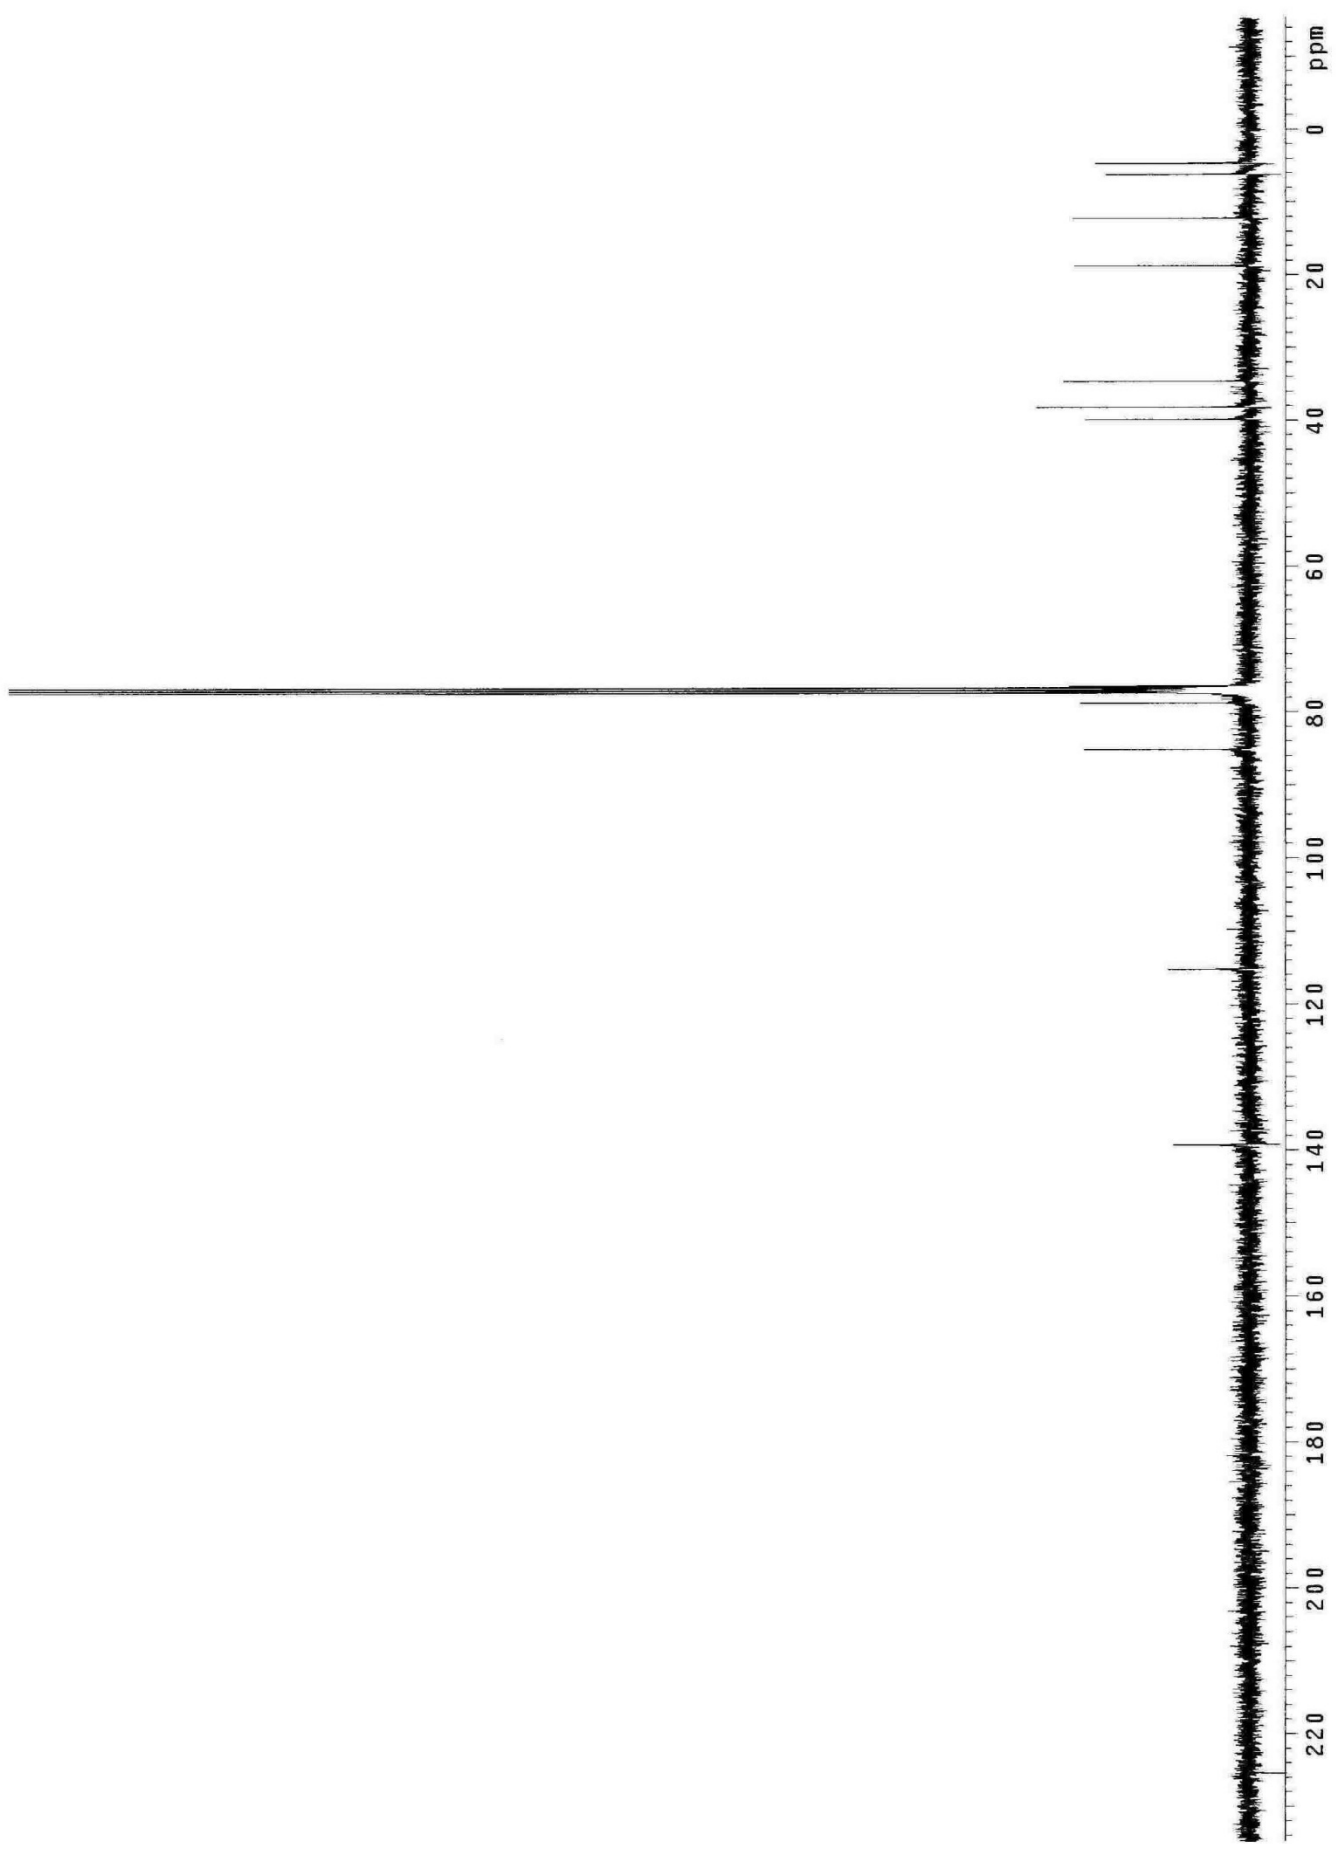

**(2*S*,3*R*,4*R*,5*R*,6*S*)-2-((*S*)-but-3-en-2-yl)-6-(iodomethyl)-4-((4-methoxybenzyl)oxy)-3,5-dimethyltetrahydro-2*H*-pyran**

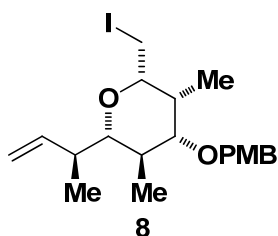

A solution of (2*S*,3*R*,4*R*,5*R*,6*S*)-2-((*S*)-but-3-en-2-yl)-6-(iodomethyl)-3,5-dimethyltetrahydro-2*H*-pyran-4-ol (628 mg, 2.00 mmol, 100 mol%) and PMB-imidate (2825.5 mg, 10.00 mmol, 500 mol%) in diethyl ether (6.7 mL, 0.30 M) was heated to 30 °C. To this solution was added camphorsulfonic acid (46.5 mg, 0.2 mmol, 10 mol%) in one portion. The reaction was stirred at 30 °C overnight. Saturated aqueous NaHCO<sub>3</sub> was added and the reaction mixture was transferred to a separatory funnel. The aqueous phase was extracted with DCM (3 × 30 mL). The combined organic extracts were dried (MgSO<sub>4</sub>), filtered and concentrated under reduced pressure. The residue was purified by flash column chromatography (SiO<sub>2</sub>: ethyl acetate:hexanes, 1:20) to give the title compound (702.1 mg, 1.58 mmol) as a colorless oil in 79% yield.

**TLC (SiO<sub>2</sub>):** R<sub>f</sub> = 0.72 (ethyl acetate:hexanes, 1:3).

**<sup>1</sup>H NMR**(400 MHz, CDCl<sub>3</sub>): δ 7.28-7.26 (m, 2H), 6.89-6.86 (m, 2H), 5.81 (dt, *J* = 18.0, 9.2 Hz, 1H), 4.99-4.95 (m, 2H), 4.56 (d, *J* = 11.2 Hz, 1H), 4.28 (d, *J* = 11.2 Hz, 1H), 3.81 (s, 3H), 3.47 (ddd, *J* = 8.0, 6.0, 2.0 Hz, 1H), 3.27 (dd, *J* = 10.0, 8.0 Hz, 1H), 3.11 (dd, *J* = 10.0, 6.4 Hz, 1H), 2.87 (dd, *J* = 10.4, 2.0 Hz, 1H), 2.43-2.32 (m, 2H), 1.70-1.60 (m, 1H), 1.15 (d, *J* = 7.2 Hz, 3H), 0.86 (d, *J* = 6.4 Hz, 3H), 0.81 (d, *J* = 6.8 Hz, 3H).

**<sup>13</sup>C NMR**(100 MHz, CDCl<sub>3</sub>): δ 159.2, 139.2, 130.5, 129.4, 115.2, 113.8, 85.4, 82.9, 78.6, 69.7, 55.3, 39.9, 33.8, 32.2, 18.7, 12.6, 6.6, 4.9.

**[α]<sub>D</sub><sup>25</sup>** = +51.2 (c = 0.58, CHCl<sub>3</sub>).

**FTIR** (neat): ν 3100, 2977, 2952, 2332, 1638, 1458, 1455, 1350, 1324, 1212, 1155, 1082, 967, 958, 773, 699, 650.

**HRMS:** (CI) Calcd. for C<sub>20</sub>H<sub>30</sub>O<sub>3</sub>I [M+H]<sup>+</sup>: 445.1240, Found: 445.1247.

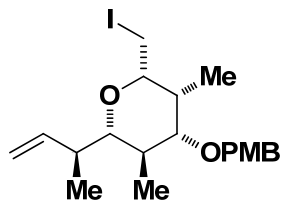

Archive directory:  
 Sample directory:  
 Pulse Sequence: s2pu1  
 Solvent: cdcl3  
 Ambient temperature  
 File: OK-XVI-60\_s2pu1\_H1  
 INOVA-500 "nmreIroy"  
 Relax. delay 2.000 sec  
 Pulse 30.0 degrees  
 Acq. time 4.000 sec  
 Width 6410.3 Hz  
 64 repetitions  
 OBSERVE HI, 399.8047099 MHz  
 DATA PROCESSING  
 Line broadening 0.1 Hz  
 File size 68386  
 Total time 6 min, 36 sec

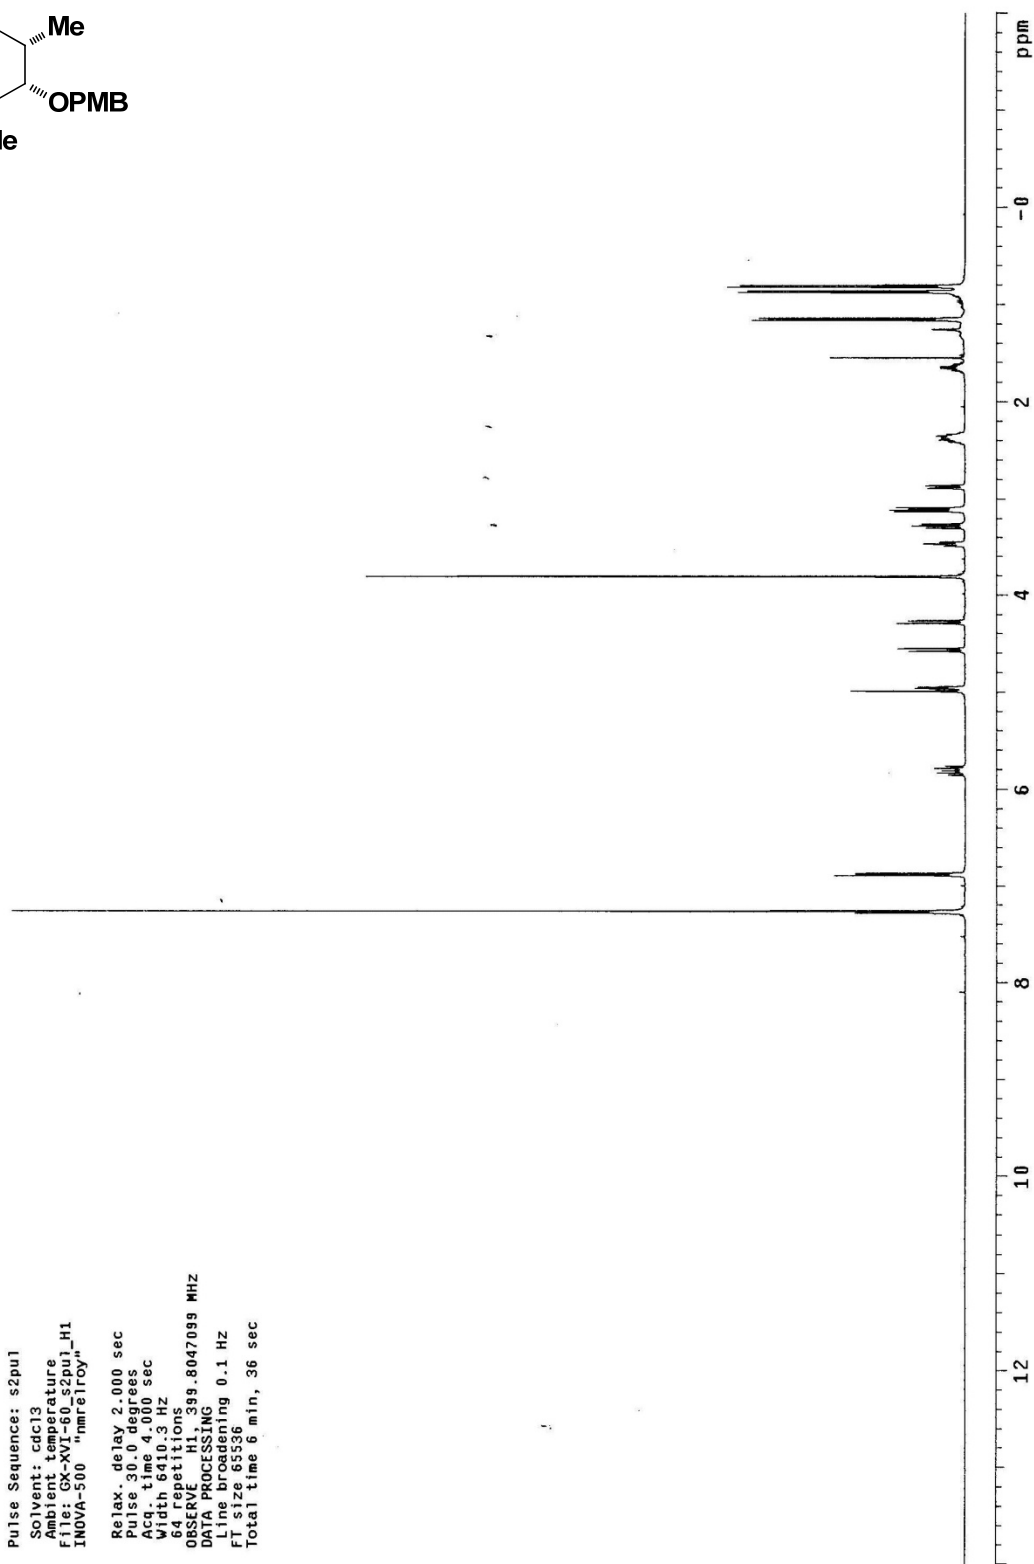

Archive directory:  
Sample directory:  
Pulse Sequence: s2pul  
Solvent: cdcl3  
Ambient temperature  
User: 1-14-87  
File: GK-XVI-60\_s2pul\_C13  
INOVA-500 "nmreirroy"

Relax. delay 2.000 sec  
Pulse 30.0 degrees  
Acq. time 1.300 sec  
Width 24509.8 Hz  
Sweep repetitions  
OBSERVE CH, 100.5309755 MHz  
DECOUPLE H1, 399.8067105 MHz  
Power 4.0 dB  
continuously on  
WALTZ-16 modulated  
DATA PROCESSING  
Line broadening 2.0 Hz  
FT size 65536  
Total time 4 hr, 35 min, 47 sec

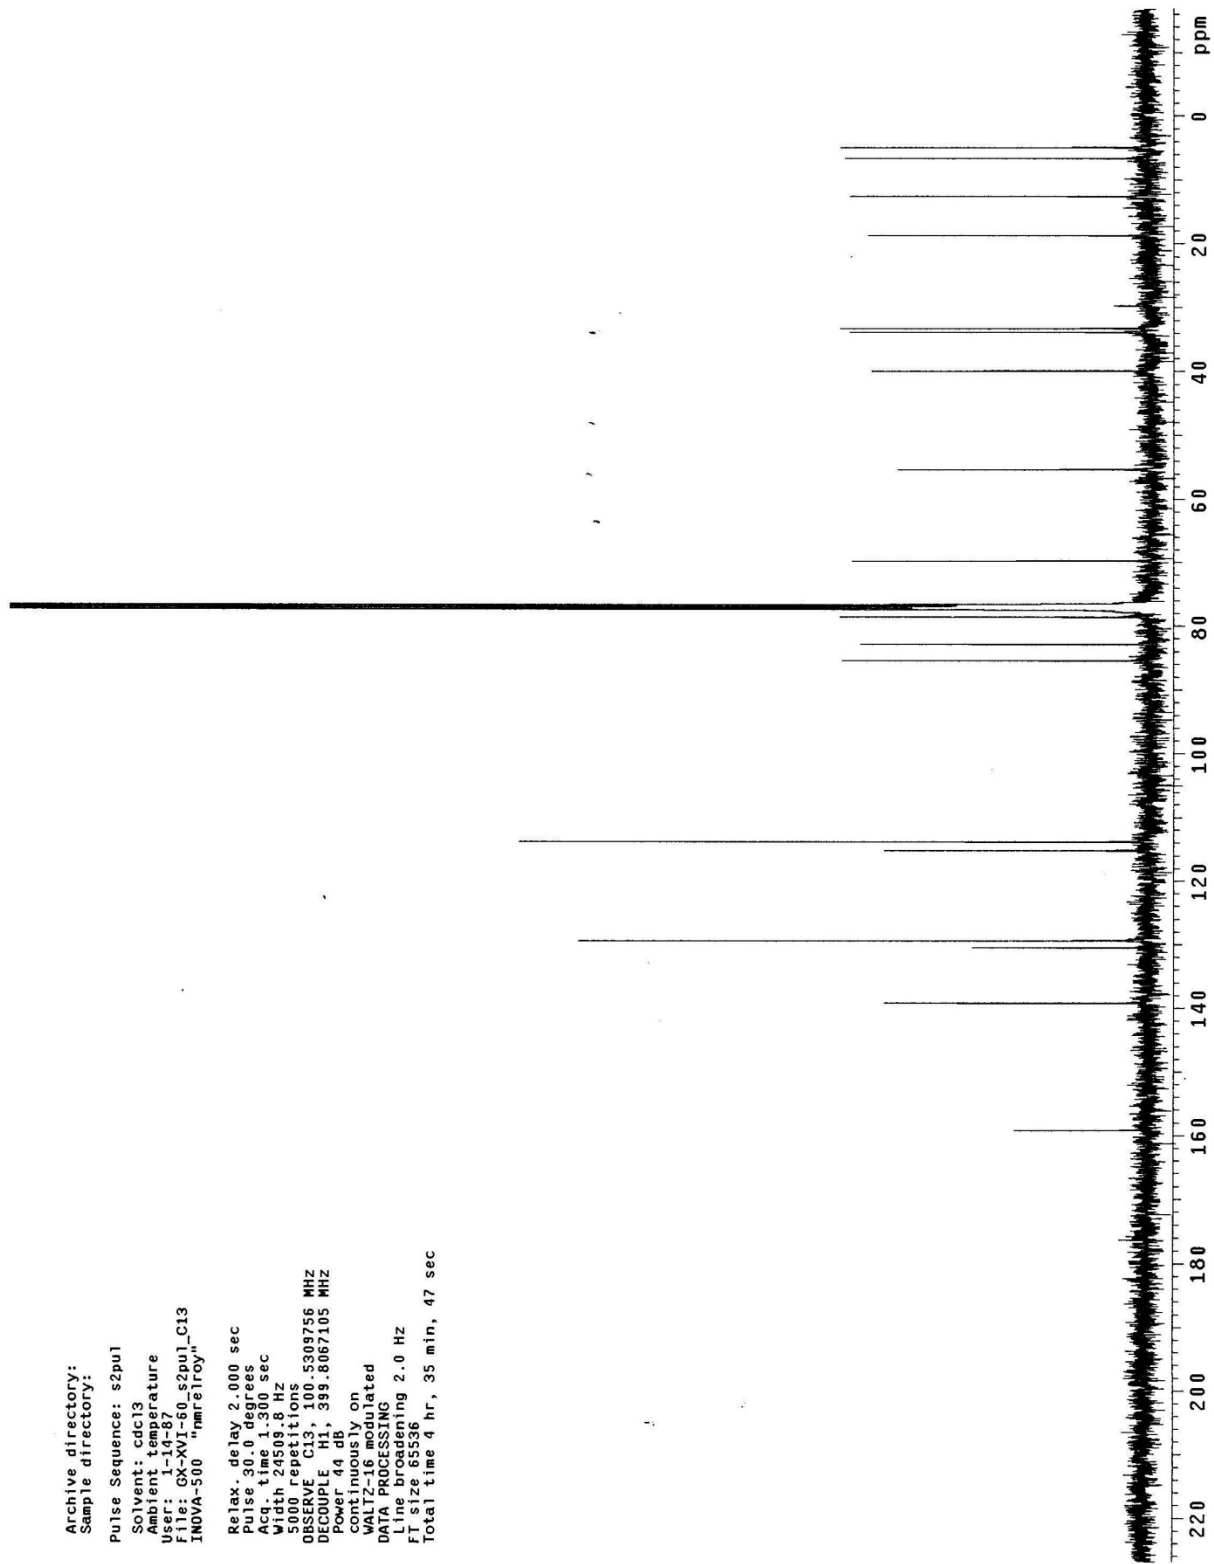

**(R)-2-((2R,3R,4R,5R,6S)-6-(iodomethyl)-4-((4-methoxybenzyl)oxy)-3,5-dimethyltetrahydro-2H-pyran-2-yl)propanoic acid**

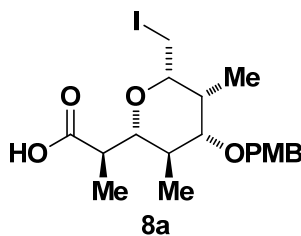

A solution of (2*S*,3*R*,4*R*,5*R*,6*S*)-2-((*S*)-but-3-en-2-yl)-6-(iodomethyl)-4-((4-methoxybenzyl)oxy)-3,5-dimethyltetrahydro-2*H*-pyran (300 mg, 0.675 mmol, 100 mol%) and NaHCO<sub>3</sub> (84.9 mg, 1.01 mmol, 150 mol%) in DMF (15.0 mL, 0.05 M) was added stock solution of OsO<sub>4</sub> in *t*-butanol (128.7 mg, 4% in H<sub>2</sub>O, 0.02 mmol, 3 mol%). After 5 min stirring under room temperature, solid Oxone (1.660 g, 2.7 mmol, 400 mol%) was added to this solution in one portion. The reaction was stirred at room temperature for 6 hr. The reaction mixture was warmed to 0 °C and was allowed to stir at this temperature for 6 hr. Saturated aqueous Na<sub>2</sub>S<sub>2</sub>O<sub>3</sub> was added and the reaction mixture was stirred vigorously for 15 min. The reaction mixture was acidified with pH = 4.00 buffer solution and transferred to a separatory funnel. The aqueous phase was extracted with ethyl acetate (3 × 30 mL). The combined organic extracts were dried (MgSO<sub>4</sub>), filtered and concentrated under reduced pressure. The residue was purified by flash column chromatography (SiO<sub>2</sub>: ethyl acetate:hexanes, 1:10) to give the title compound (274.6 mg, 0.594 mmol) as a colorless oil in 88% yield.

**TLC (SiO<sub>2</sub>):** R<sub>f</sub> = 0.39 (ethyl acetate:hexanes, 1:2).

**<sup>1</sup>H NMR**(400 MHz, CDCl<sub>3</sub>): δ 7.28-7.26 (m, 2H), 6.89-6.87 (m, 2H), 4.58 (d, *J* = 11.2 Hz, 1H), 4.29 (d, *J* = 11.2 Hz, 1H), 3.81 (s, 3H), 3.57-3.53 (m, 1H), 3.27 (dd, *J* = 10.0, 7.6 Hz, 1H), 3.16 (dd, *J* = 10.4, 2.4 Hz, 1H), 3.13-3.09 (m, 2H), 2.82 (td, *J* = 7.2, 2.4 Hz, 1H), 2.41-2.36 (m, 1H), 1.98-1.88 (m, 1H), 1.30 (d, *J* = 7.2 Hz, 3H), 0.94 (d, *J* = 6.8 Hz, 3H), 0.83 (d, *J* = 6.8 Hz, 3H).

**<sup>13</sup>C NMR**(100 MHz, CDCl<sub>3</sub>): δ 177.7, 159.2, 130.1, 129.4, 113.8, 83.7, 82.3, 79.3, 69.8, 55.3, 41.5, 33.7, 33.4, 13.9, 12.8, 5.4, 4.9.

**[α]<sub>D</sub><sup>25</sup>** = +45.9 (c = 0.55, CHCl<sub>3</sub>).

**FTIR** (neat): ν 3500, 3348, 3150, 3000, 2976, 2951, 1705, 1620, 1543, 1243, 1175, 1067, 922, 878, 842, 773, 692, 668.

**HRMS**: (CI) Calcd. for C<sub>19</sub>H<sub>28</sub>O<sub>5</sub>I [M+H]<sup>+</sup>: 463.0982, Found: 463.0981.

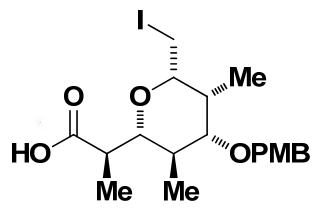

Archive directory:  
 Sample directory:  
 Pulse Sequence: s2pul  
 Solvent: cdc13  
 Ambient temperature  
 File: GX-XVI-Iodoacid-s2pul\_H1  
 INOVA-500 "nmrelroy"  
 Relax. delay 2.000 sec  
 Pulse 30.0 degrees  
 Acq. time 4.000 sec  
 Width 6410.3 Hz  
 64 repetitions  
 OBSERVE H1, 399.8047101 MHz  
 DATA PROCESSING  
 FT size 8556  
 Total time 6 min, 36 sec

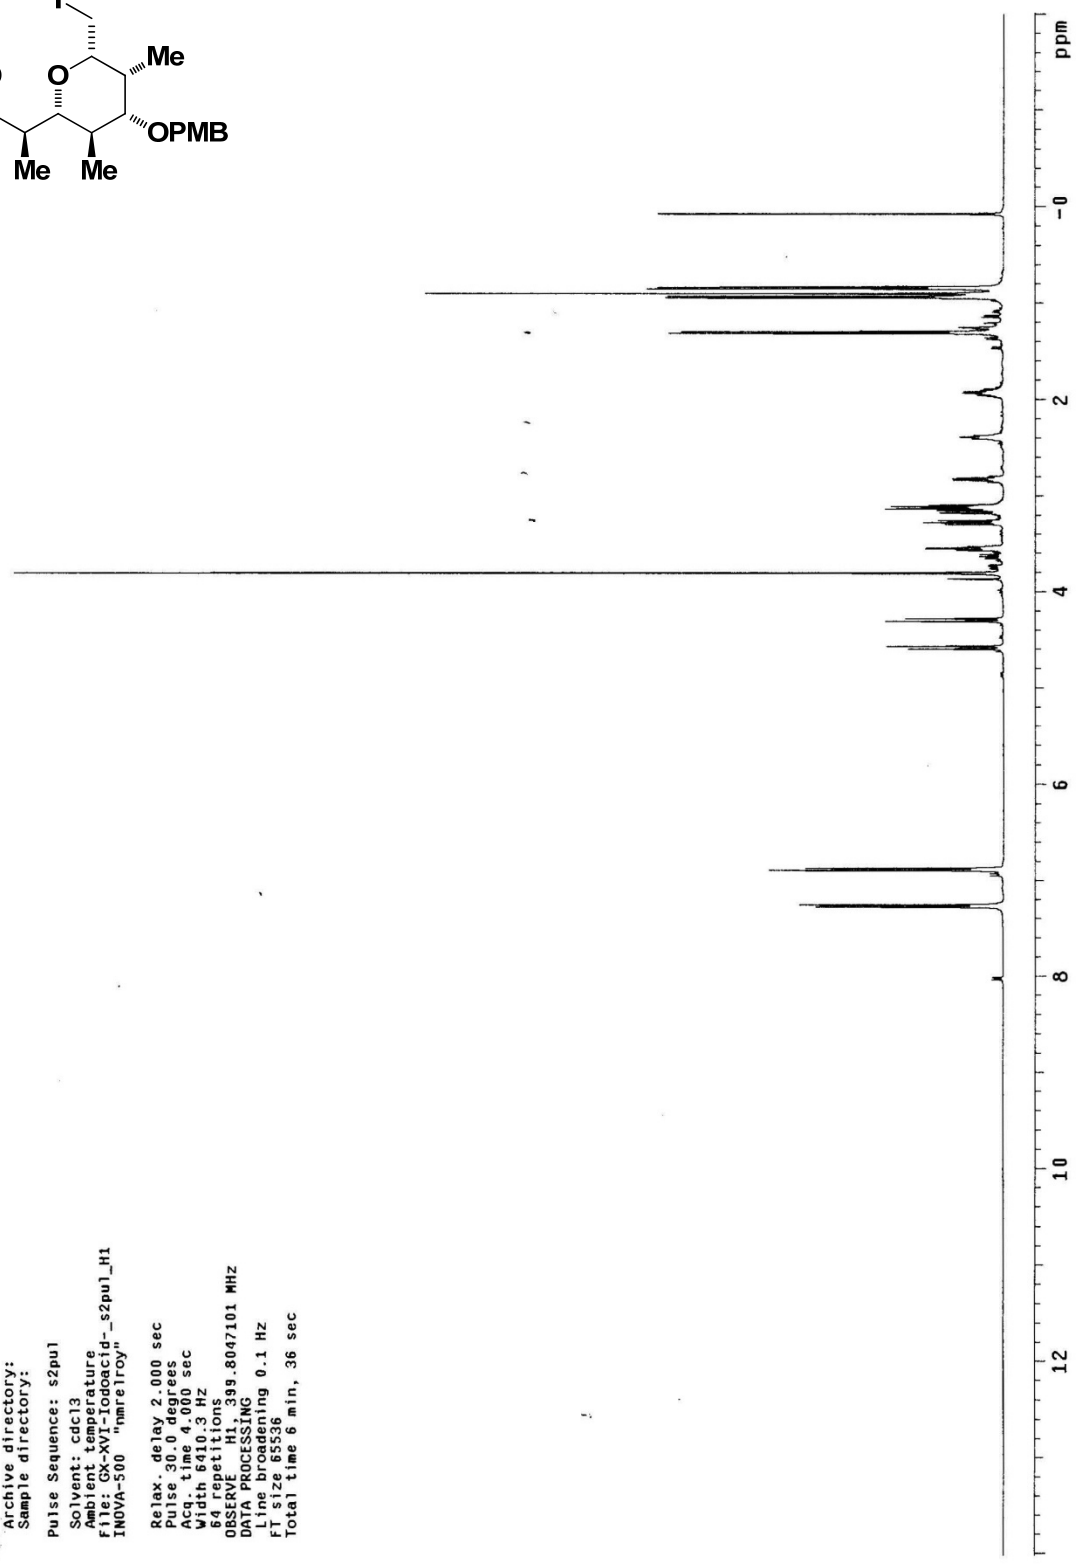

Archive directory:  
Sample directory:  
Pulse Sequence: s2pul  
Solvent: cdcl3  
Ambient temperature  
User: 1-14-87  
File: CX-XVI-Iodoacid\_s2pul\_C13  
INOVA-500 "hmrirroy"  
Relax. delay 2.000 sec  
Pulse 30.0 degrees  
Acq. time 1.300 sec  
Width 24509.8 Hz  
3000 repetitions  
OBSERVE CH, 10.5309779 MHz  
DECUPLE H1, 399.8087105 MHz  
Power 44 dB  
continuously on  
WALTZ-16 modulated  
DATA PROCESSING  
Line broadening 2.0 Hz  
FT size 65536  
Total time 4 hr, 35 min, 47 sec

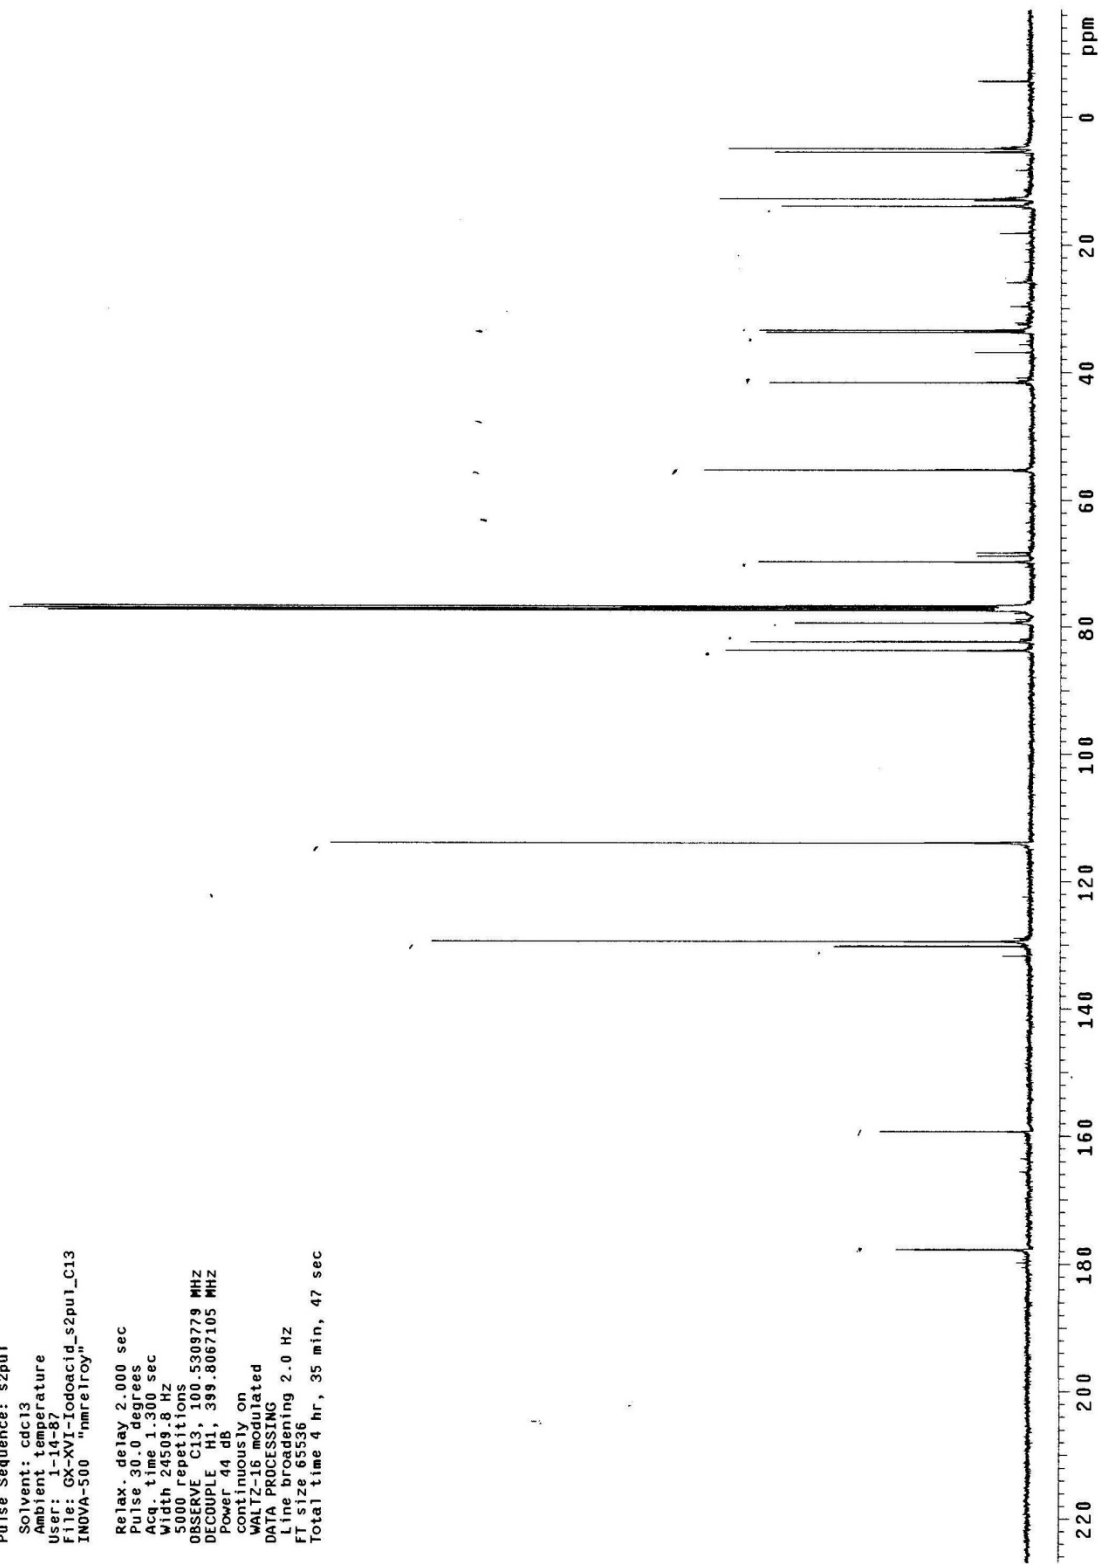



**(2R,3R,4S,5S,6S)-3-hydroxy-5-((4-methoxybenzyl)oxy)-2,4,6-trimethyloct-7-enoic acid**

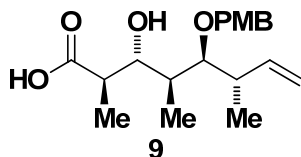

A solution of *(R)*-2-((2*R*,3*R*,4*R*,5*R*,6*S*)-6-(iodomethyl)-4-((4-methoxybenzyl)oxy)-3,5-dimethyltetrahydro-2*H*-pyran-2-yl)propanoic acid (137.1 mg, 0.297 mmol, 100 mol%) in EtOH (3 mL, 0.1 M) was added activated Zn (289.6 mg, 4.455 mmol, 1500 mol%) and NH<sub>4</sub>Cl (158.9 mg, 2.97 mmol, 1000 mol%). The reaction mixture was heated under refluxing for 1 hr. The crude reaction mixture was diluted with ethyl acetate (15 mL) and HCl in THF (1 mL, 1.0M) and filtered through a silica plug. The filtrate was concentrated under reduced pressure. Purification by flash column chromatography (SiO<sub>2</sub>: ethyl acetate:hexanes, 1:3) gave the title compound (91.9 mg, 0.273 mmol) as a colorless oil in 92% yield.

**TLC (SiO<sub>2</sub>):** R<sub>f</sub> = 0.45 (methanol:DCM, 1:9).

**<sup>1</sup>H NMR**(400 MHz, CDCl<sub>3</sub>): δ 7.26-7.24 (m, 2H), 6.89-6.87 (m, 2H), 5.97 (ddd, *J* = 17.2, 10.0, 8.0 Hz, 1H), 5.14 (dt, *J* = 17.2, 1.6 Hz, 1H), 5.07 (dd, *J* = 10.0, 1.6 Hz, 1H), 4.60 (d, *J* = 10.8 Hz, 1H), 4.49 (d, *J* = 10.8 Hz, 1H), 3.80 (s, 3H), 3.74 (dd, *J* = 8.0, 4.8 Hz, 1H), 3.58 (dd, *J* = 6.0, 2.8 Hz, 1H), 2.67-2.53 (m, 2H), 2.08-1.99 (m, 1H), 1.27 (d, *J* = 7.2 Hz, 3H), 1.03 (d, *J* = 7.2 Hz, 3H), 1.00 (d, *J* = 7.2 Hz, 3H).

**<sup>13</sup>C NMR**(100 MHz, CDCl<sub>3</sub>): δ 177.4, 159.5, 141.0, 129.8, 129.6, 115.2, 114.0, 84.0, 76.3, 73.1, 55.3, 42.4, 40.1, 37.1, 18.3, 14.8, 12.2.

**[α]<sub>D</sub><sup>25</sup>** = -21.7 (c = 0.58, CHCl<sub>3</sub>).

**FTIR** (neat): ν 3500, 3428, 3050, 3044, 2984, 2941, 1705, 1616, 1533, 1249, 1170, 1060, 922, 878, 842.

**HRMS:** (CI) Calcd. for C<sub>19</sub>H<sub>29</sub>O<sub>5</sub> [M+H]<sup>+</sup>: 337.2015, Found: 337.2020.

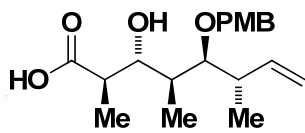

Archive directory:  
 Sample directory:  
 Pulse Sequence: s2pu1  
 Solvent: cdc13  
 Ambient temperature  
 File: GX-XVI-Ant1A\_s2pu1\_H1  
 INOVA-500 "nmrastr0"  
 Relax. delay 2.000 sec  
 Pulse 30.0 degrees  
 Acq. time 4.000 sec  
 Width 6410.3 Hz  
 64 repetitions  
 OBSERVE H1 399.8047103 MHz  
 DATA PROCESSING  
 F1 size 85536  
 Total time 6 min, 36 sec

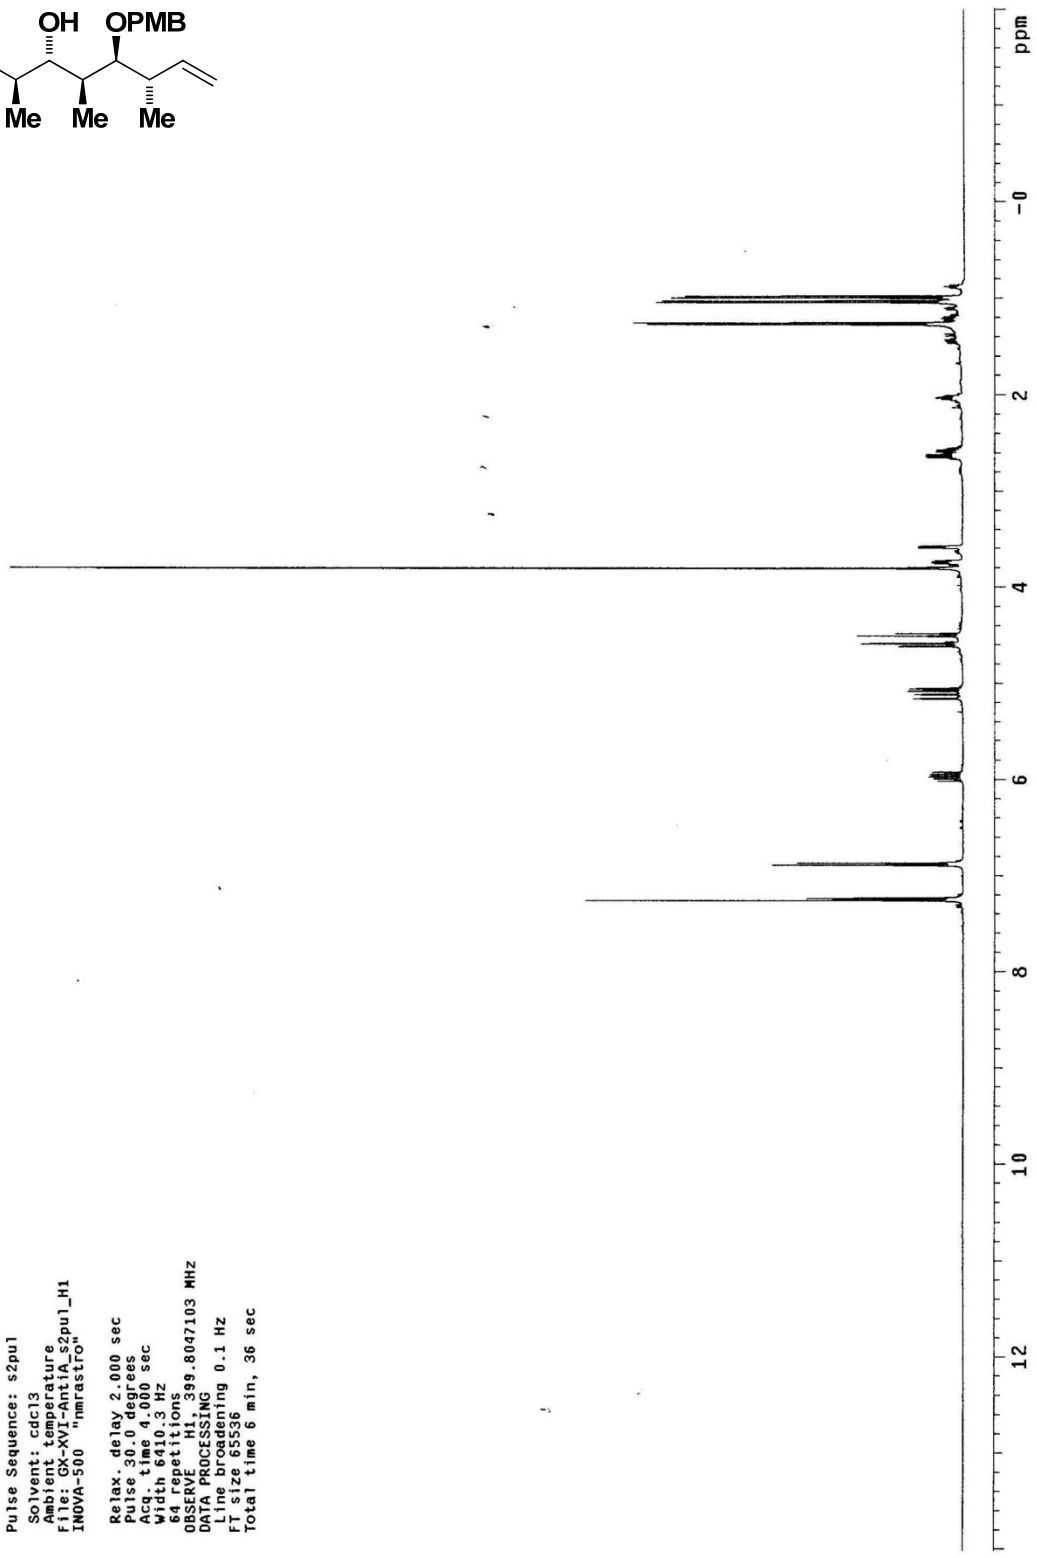

Archive directory:  
Sample directory:  
Pulse Sequence: s2pul  
Solvent: cdc13  
Ambient temperature  
User: i-14-87  
File: 0X-XVI-Antia\_s2pul\_C13  
INOVA-500 "nmraastro"

Relax. delay 2.000 sec  
Pulse 30.0 degrees  
Acq. time 1.300 sec  
Width 24509.8 Hz  
5000 repetitions  
OBSERVE C13, 100.5309748 MHz  
DECODE H1, 399.8667105 MHz  
Power 44 dB  
continuously on  
WALTZ-16 modulated  
DATA PROCESSING  
Line broadening 2.0 Hz  
FT size 65536  
Total time 4 hr, 35 min, 47 sec

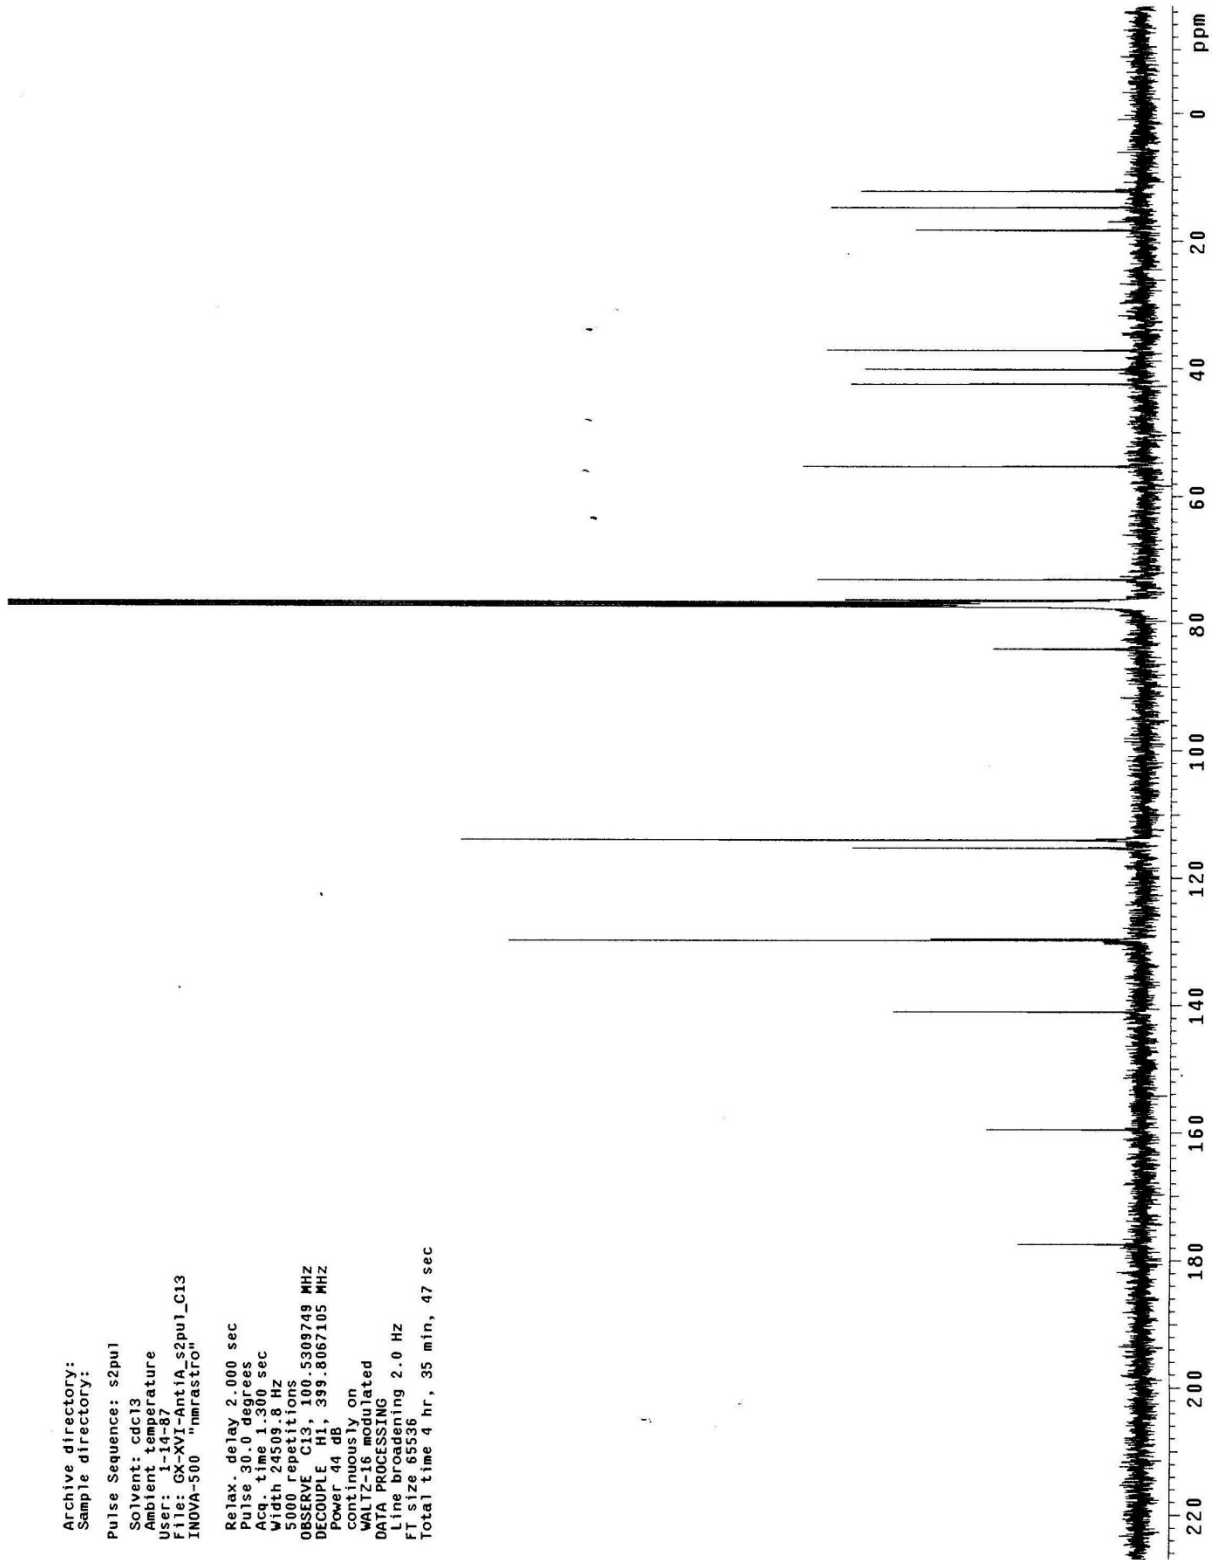

**(3*R*,4*S*)-4-((2*R*,3*S*,4*S*)-3-((4-methoxybenzyl)oxy)-4-methylhex-5-en-2-yl)-3-methyloxetan-2-one**

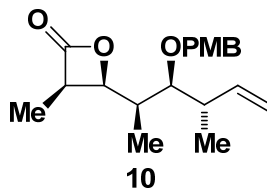

A solution of (2*R*,3*R*,4*S*,5*S*,6*S*)-3-hydroxy-5-((4-methoxybenzyl)oxy)-2,4,6-trimethyloct-7-enoic acid (34 mg, 0.1 mmol, 100 mol%) in THF:HMPA (0.5, 1:1, 0.20 M) was cooled to -78 °C. To this solution was added *s*-butyl lithium (0.26 mL, 1.4 M, 0.35 mmol, 350 mol%) dropwise. The reaction was warmed to -20 °C and stirred for 2 hr. Chloromethanesulfonyl chloride (52.2 mg, 0.35 mmol, 350 mol%) in THF (0.1 mL) was added to the reaction mixture and stirring was continued for another 2 hr. Pyridine:H<sub>2</sub>O (15 mL, 40:1) was added and the reaction mixture was allowed to stir under 35 °C overnight. The reaction mixture was diluted with ethyl acetate (100 mL) and transferred to a separatory funnel. The organic phase was washed with CuSO<sub>4</sub> (30 mL), water (30 mL) and brine (30 mL). The organic extracts were dried (MgSO<sub>4</sub>), filtered and concentrated under reduced pressure. The residue was purified by flash column chromatography (SiO<sub>2</sub>: ethyl acetate:hexanes, 1:20) to give the title compound (22.9 mg, 0.072 mmol) as a colorless oil in 72% yield.

**TLC (SiO<sub>2</sub>):** R<sub>f</sub> = 0.73 (ethyl acetate:hexanes, 1:2).

**<sup>1</sup>H NMR**(400 MHz, CDCl<sub>3</sub>): δ 7.24-7.22 (m, 2H), 6.89-6.87 (m, 2H), 5.91 (ddd, *J* = 18.0, 10.4, 8.0 Hz, 1H), 5.15 (dd, *J* = 18.0, 1.2 Hz, 1H), 5.09 (dd, *J* = 10.4, 1.2 Hz, 1H), 4.60 (d, *J* = 11.6 Hz, 1H), 4.30 (dd, *J* = 10.8, 6.4 Hz, 1H), 4.25 (d, *J* = 11.6 Hz, 1H), 3.81 (s, 3H), 3.19 (qd, *J* = 8.0, 6.0 Hz, 1H), 3.08 (dd, *J* = 8.0, 1.6 Hz, 1H), 2.56 (qd, *J* = 14.8, 6.8 Hz, 1H), 2.06 (dq, *J* = 13.6, 6.8, 1.6 Hz, 1H), 1.20 (d, *J* = 8.0 Hz, 3H), 1.07 (d, *J* = 6.8 Hz, 3H), 1.02 (d, *J* = 6.8 Hz, 3H).

**<sup>13</sup>C NMR**(100 MHz, CDCl<sub>3</sub>): δ 172.7, 159.4, 141.2, 130.1, 129.9, 115.2, 113.8, 80.4, 77.6, 73.3, 55.3, 46.4, 41.0, 35.6, 16.7, 9.4, 9.0.

**[α]<sub>D</sub><sup>25</sup>** = -20.1 (c = 0.34, CHCl<sub>3</sub>).

**FTIR** (neat): ν 3300, 3080, 2963, 2925, 1821, 1466, 1377, 1128, 1043, 1000, 970, 923, 888, 842, 761, 731.

**HRMS:** (CI) Calcd. for C<sub>19</sub>H<sub>26</sub>O<sub>4</sub> [M]<sup>+</sup>: 316.1675, Found: 316.1673.

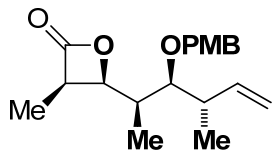

Archive directory:  
Sample directory:

Pulse Sequence: s2pu1

Solvent: cdcl3

Ambient temperature

File: GX-XVI-53\_s2pu1\_H1

INOVA-500 "hmr1roy"

Relax. delay 2.000 sec

Pulse 30.0 degrees

Acq. time 4.000 sec

Width 6410.3 Hz

64 repetitions

OBSERVE H1, 399.8047105 MHz

DATA PROCESSING

Line broadening 0.1 Hz

FT size 65536

Total time 6 min, 36 sec

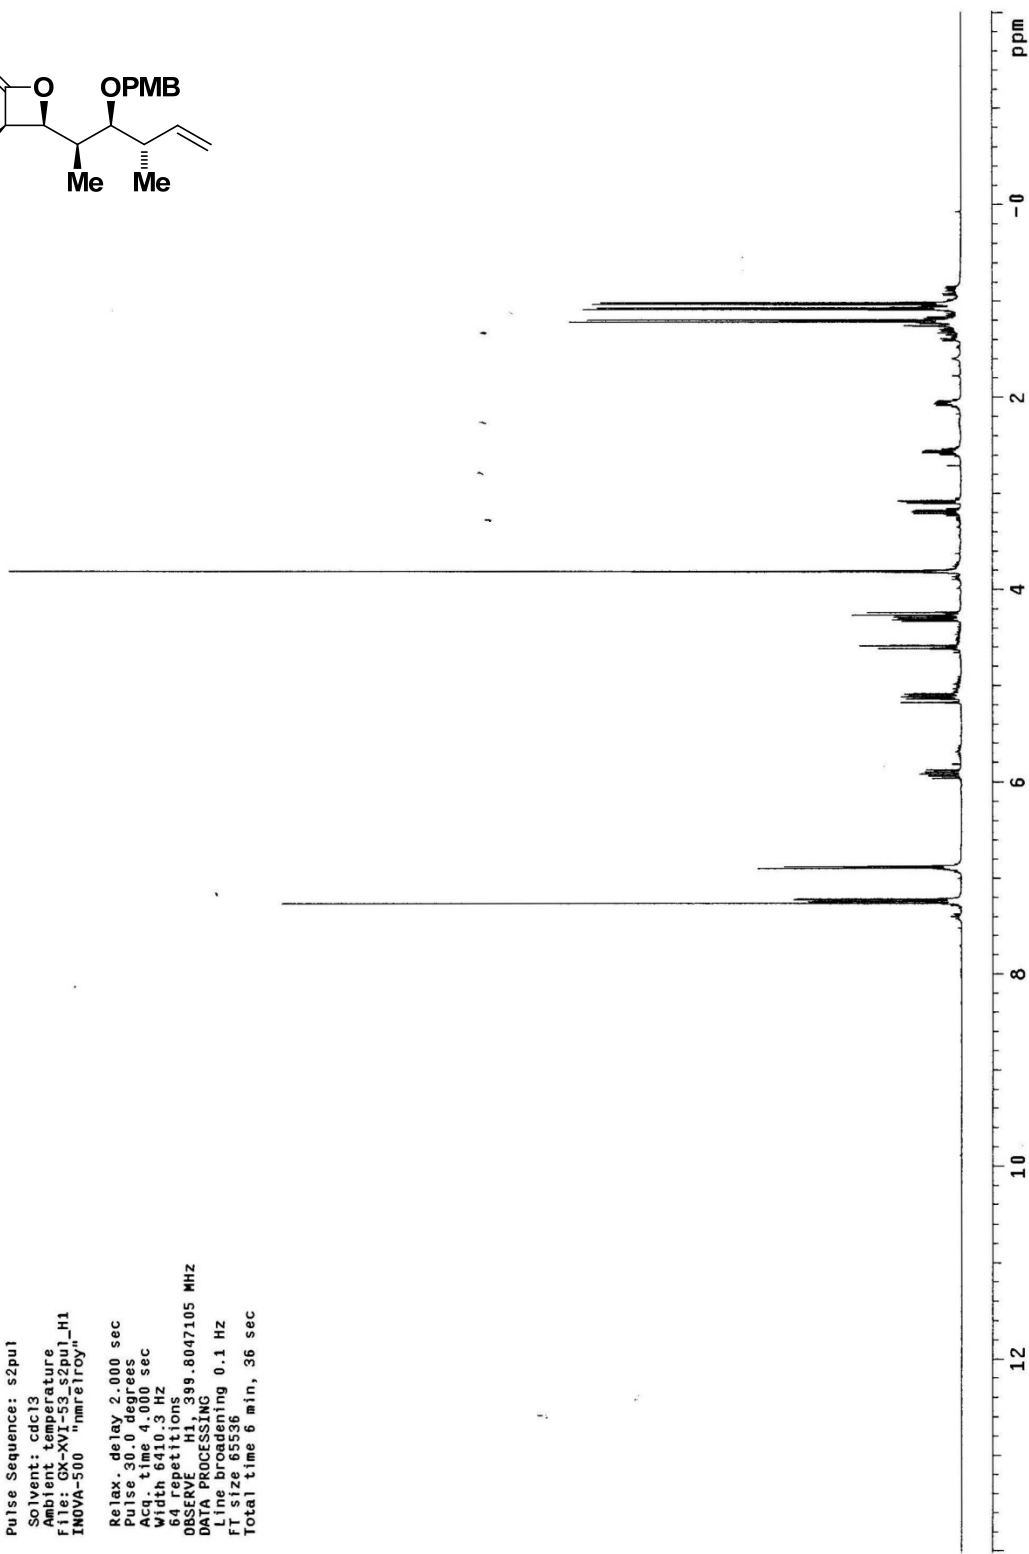

Archive directory:  
Sample directory:

Pulse Sequence: s2pul

Solvent: cdc13  
Ambient temperature  
User: 1-14-87  
File: GX-XVI-53-s2pul\_C13  
INOVA-500 "nmrelroy"

Relax. delay 2.000 sec  
Pulse 30.0 degrees  
Acq. time 1.300 sec  
Width 24509.8 Hz  
5000 repetitions  
OBSERVE C13, 100.5309764 MHz  
DECOUPLE H1, 399.8067105 MHz  
Power 44 db  
continuously on  
WALTZ16  
DATA PROCESSING  
Line broadening 2.0 Hz  
FI size 65536  
Total time 4 hr, 35 min, 47 sec

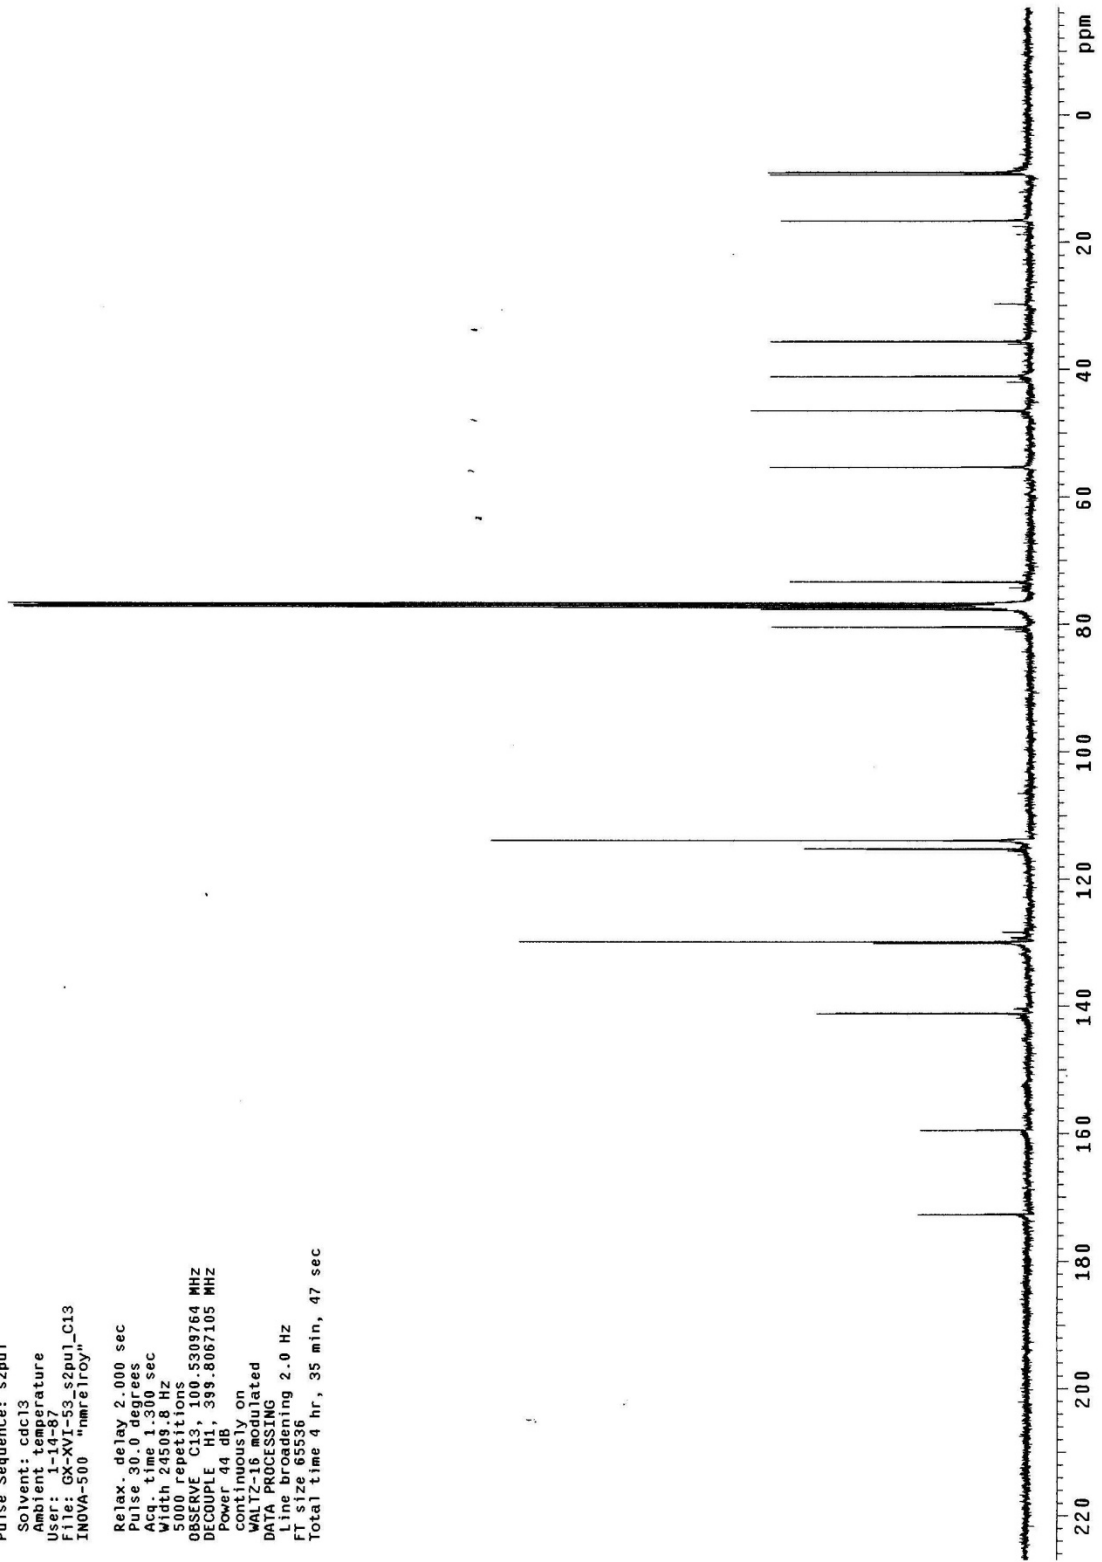

GX-XVI-53

exp4 Noesy

```

SAMPLE
date Nov 13 2012
solvent cdc13
file cdc13
ACQUISITION exp wpi
sfreq 539.753 wpc 116
at 0.155 FTPL 4393.7 1 phase
  2048 dfrq DEC. & VT 4342.2 2
  6613.8 dn C13
  4000 dpwr 31
  32 dof 0
  4 dm n
  61 dmn n
  11.6 dmf 29412
  1.0639 dseq C
  2.000 dres 9.0
  0.800 homo n
  54.5 temp 27.0
  16 dfrq2 0
  30 dn2 1
  0.0025 dpwr2 0
  8175 do2 0
  0.0020 dmf2 C
  6131 dmf2 29412
  nnn dseq2
  -13 dres2
  1.0 homo2 n
  dfrq3 0
  dn3 1
  dpwr3 1
  dof3 0
  dms3 n
  y dms3 n
  nnn dms3 29412
  y dres3
  y dres3 29412
  6613.8 homo3 1.0
  256 PROCESSING n
  phase arrayed gf 0.072
  not used
  sp -251.1 wtfile ft
  wp 6607.3 proc fn 2048
  vs 5391 fn 2048
  sc 10 math f
  wc 116 sfilter not used
  hzmm 56.96 sorder 3
  ls 744.69 sntaps 3
  rf1 4393.8 ZD PROCESSING
  tfp 4342.2 gf 0.036
  tns 100.000 wtfile not used
  al cdc ph 1n
  proc1 1n
  fn1 2048
  
```

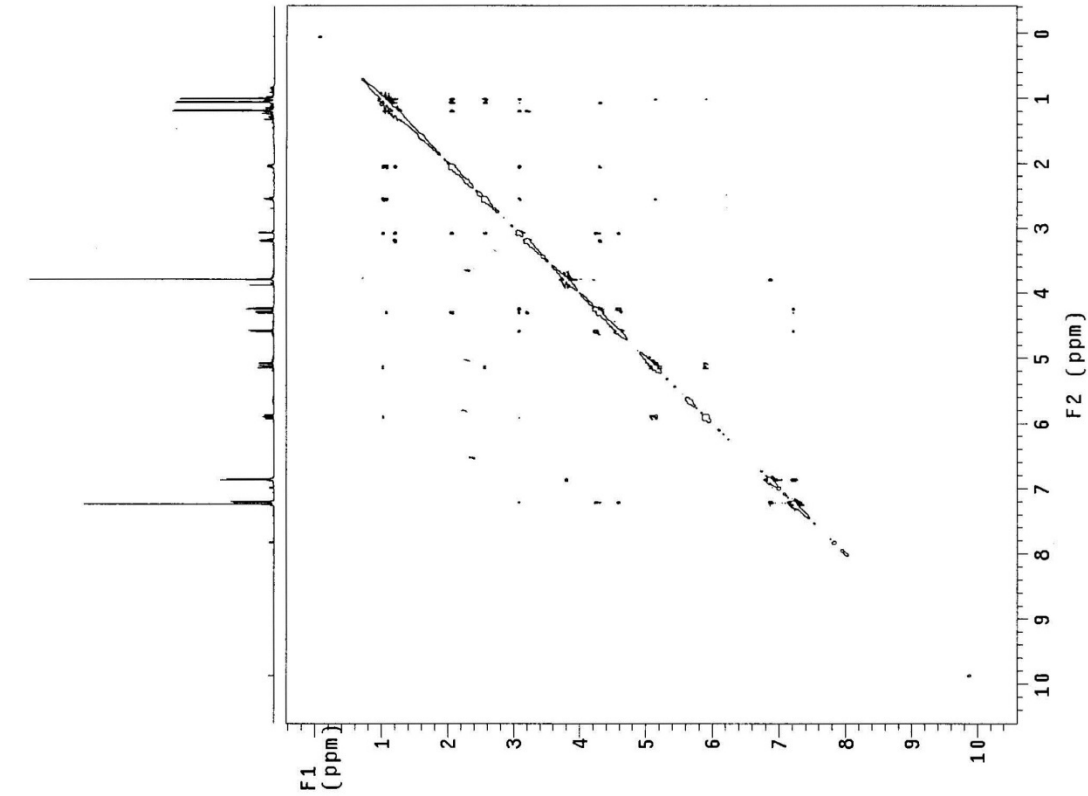

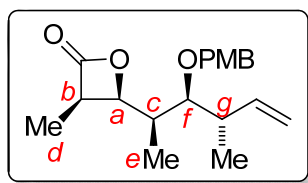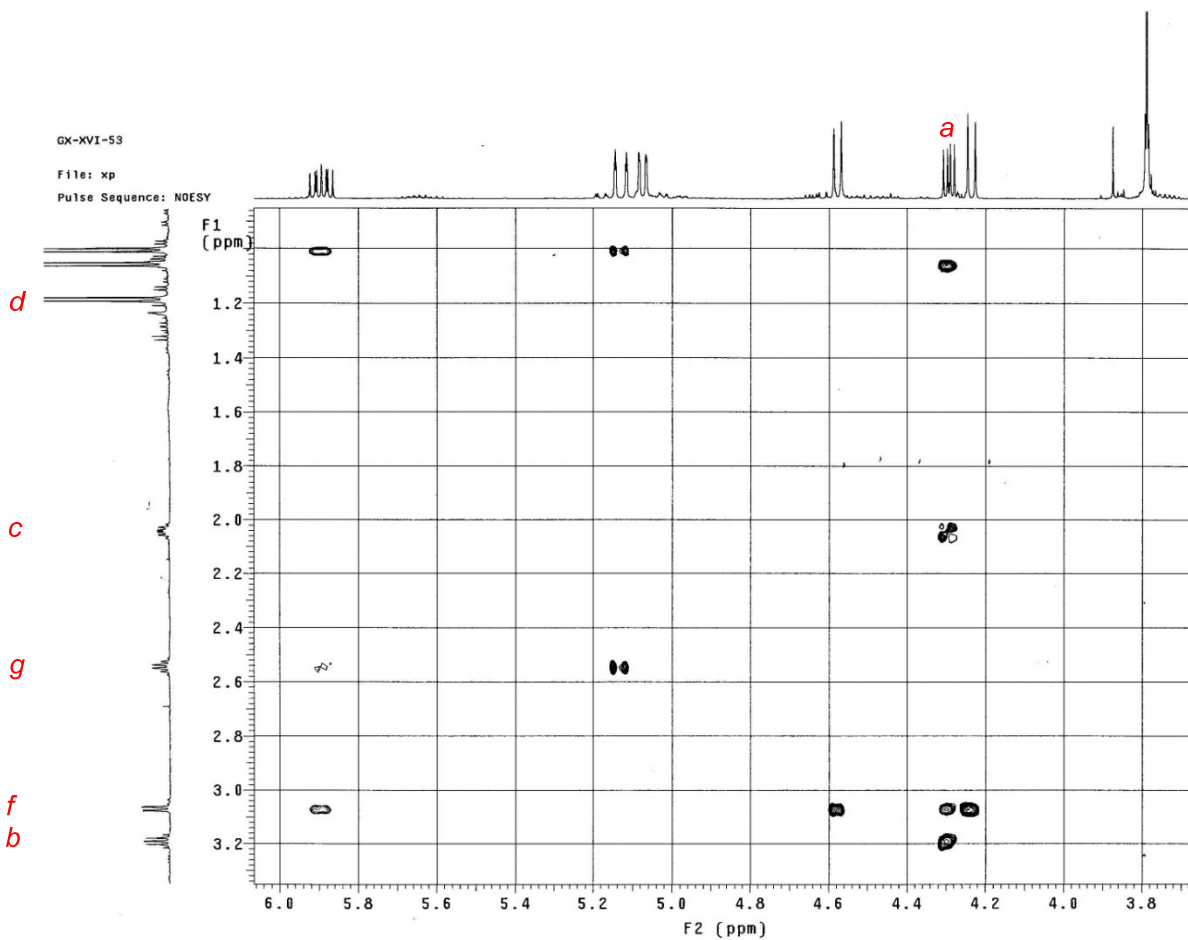

The NOE experiment shows clearly the NOE interaction between <sup>a</sup>H and <sup>b</sup>H, while <sup>a</sup>H and <sup>d</sup>H shows no NOE interaction towards each other. This data suggest a *syn* relationship of stereochemistry across the lactone ring.



**(2R,3S,4S,5S,6S)-3-hydroxy-5-((4-methoxybenzyl)oxy)-2,4,6-trimethyloct-7-enoic acid**

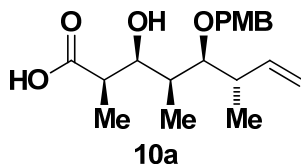

A solution of (3R,4S)-4-((2R,3S,4S)-3-((4-methoxybenzyl)oxy)-4-methylhex-5-en-2-yl)-3-methyloxetan-2-one (200 mg, 0.63 mmol, 100 mol%) in dioxane:H<sub>2</sub>O (12.6 mL, 1:1, 0.05 M) was added LiOH monohydrate (52.9 mg, 1.26 mmol, 200 mol%) in one portion. The reaction was stirred overnight. pH = 4 buffer solution (15 mL) was added and the reaction mixture was transferred to a separatory funnel. The aqueous phase was extracted with ethyl acetate (3 × 30 mL). The combined organic extracts were dried (MgSO<sub>4</sub>), filtered and concentrated under reduced pressure. The residue was purified by flash column chromatography (SiO<sub>2</sub>: ethyl acetate:hexanes, 1:3) to give the title compound (148.4 mg, 0.441 mmol) as a colorless oil in 70% yield.

**TLC (SiO<sub>2</sub>):** R<sub>f</sub> = 0.32 (ethyl acetate:hexanes, 1:1).

**<sup>1</sup>H NMR**(400 MHz, CDCl<sub>3</sub>): δ 7.26-7.24 (m, 2H), 6.89-6.86 (m, 2H), 5.92 (ddd, *J* = 17.6, 10.4, 8.4 Hz, 1H), 5.15 (dt, *J* = 17.2, 1.6 Hz, 1H), 5.08 (ddd, *J* = 10.4, 2.0, 0.8 Hz, 1H), 4.70 (d, *J* = 10.4 Hz, 1H), 4.38 (d, *J* = 10.4 Hz, 1H), 3.95 (dd, *J* = 7.6, 2.0 Hz, 1H), 3.80 (s, 3H), 3.40 (dd, *J* = 7.6, 3.2 Hz, 1H), 2.72-2.65 (m, 1H), 2.62-2.53 (m, 1H), 1.88 (qdd, *J* = 8.4, 7.2, 4.0 Hz, 1H), 1.24 (d, *J* = 7.2 Hz, 3H), 1.01 (d, *J* = 6.8 Hz, 3H), 0.97 (d, *J* = 7.2 Hz, 3H).

**<sup>13</sup>C NMR**(100 MHz, CDCl<sub>3</sub>): δ 178.6, 159.4, 141.3, 129.8, 129.6, 115.2, 113.9, 87.5, 76.0, 73.6, 55.3, 42.6, 41.1, 36.6, 16.9, 13.2, 6.9.

**[α]<sub>D</sub><sup>25</sup>** = -47.2 (c = 0.83, CHCl<sub>3</sub>).

**FTIR** (neat): ν 3478, 3409, 3081, 3068, 2974, 2938, 1707, 1613, 1514, 1459, 1249, 1175, 1035, 916, 820.

**HRMS:** (CI) Calcd. for C<sub>19</sub>H<sub>29</sub>O<sub>5</sub> [M+H]<sup>+</sup>: 337.2015, Found: 337.2018.

GX-XVI-PMB-Acid  
Pulse Sequence: s2pu1  
Solvent: CDCl3  
Ambient temperature  
Mercury-400BB "nmr6"  
Relax. delay 2.000 sec  
Pulse 16.4 degrees  
Acq. time 2.856 sec  
Width 5602.2 Hz  
64 repetitions  
OBSERVE H1, 400.2669783 MHz  
DATA PROCESSING  
F1, size, 32798  
Line broadening 0.1 Hz  
Total time 7 min, 29 sec

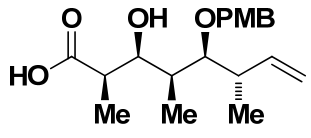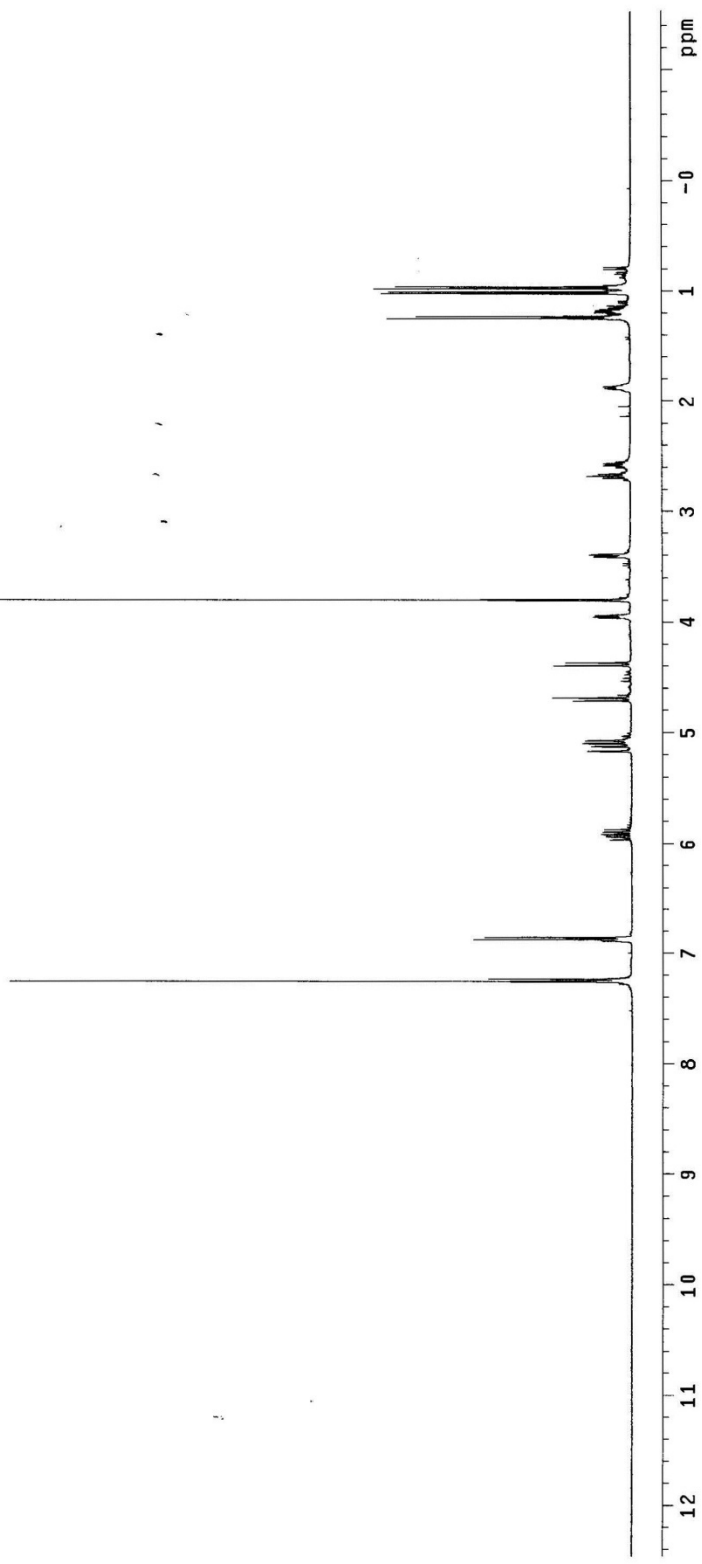

Archive directory:  
Sample directory:  
Pulse Sequence: s2pul  
Solvent: cdc13  
Ambient temperature  
User: 1-14-87  
File: GX-XVI-PMB-Acid\_s2pul\_C13  
INDVA-500 "nmrelroy"  
Relax. delay 2.000 sec  
Pulse 30.0 degrees  
Acq. time 1.300 sec  
Width 24509.8 Hz  
5000 repetitions  
OBSERVE C13, 100.5309749 MHz  
DECOUPLE H1, 599.8067105 MHz  
Power continuously on  
WALTZ-16 modulated  
DATA PROCESSING  
Line broadening 2.0 Hz  
FT size 65536  
Total time 4 hr, 35 min, 47 sec

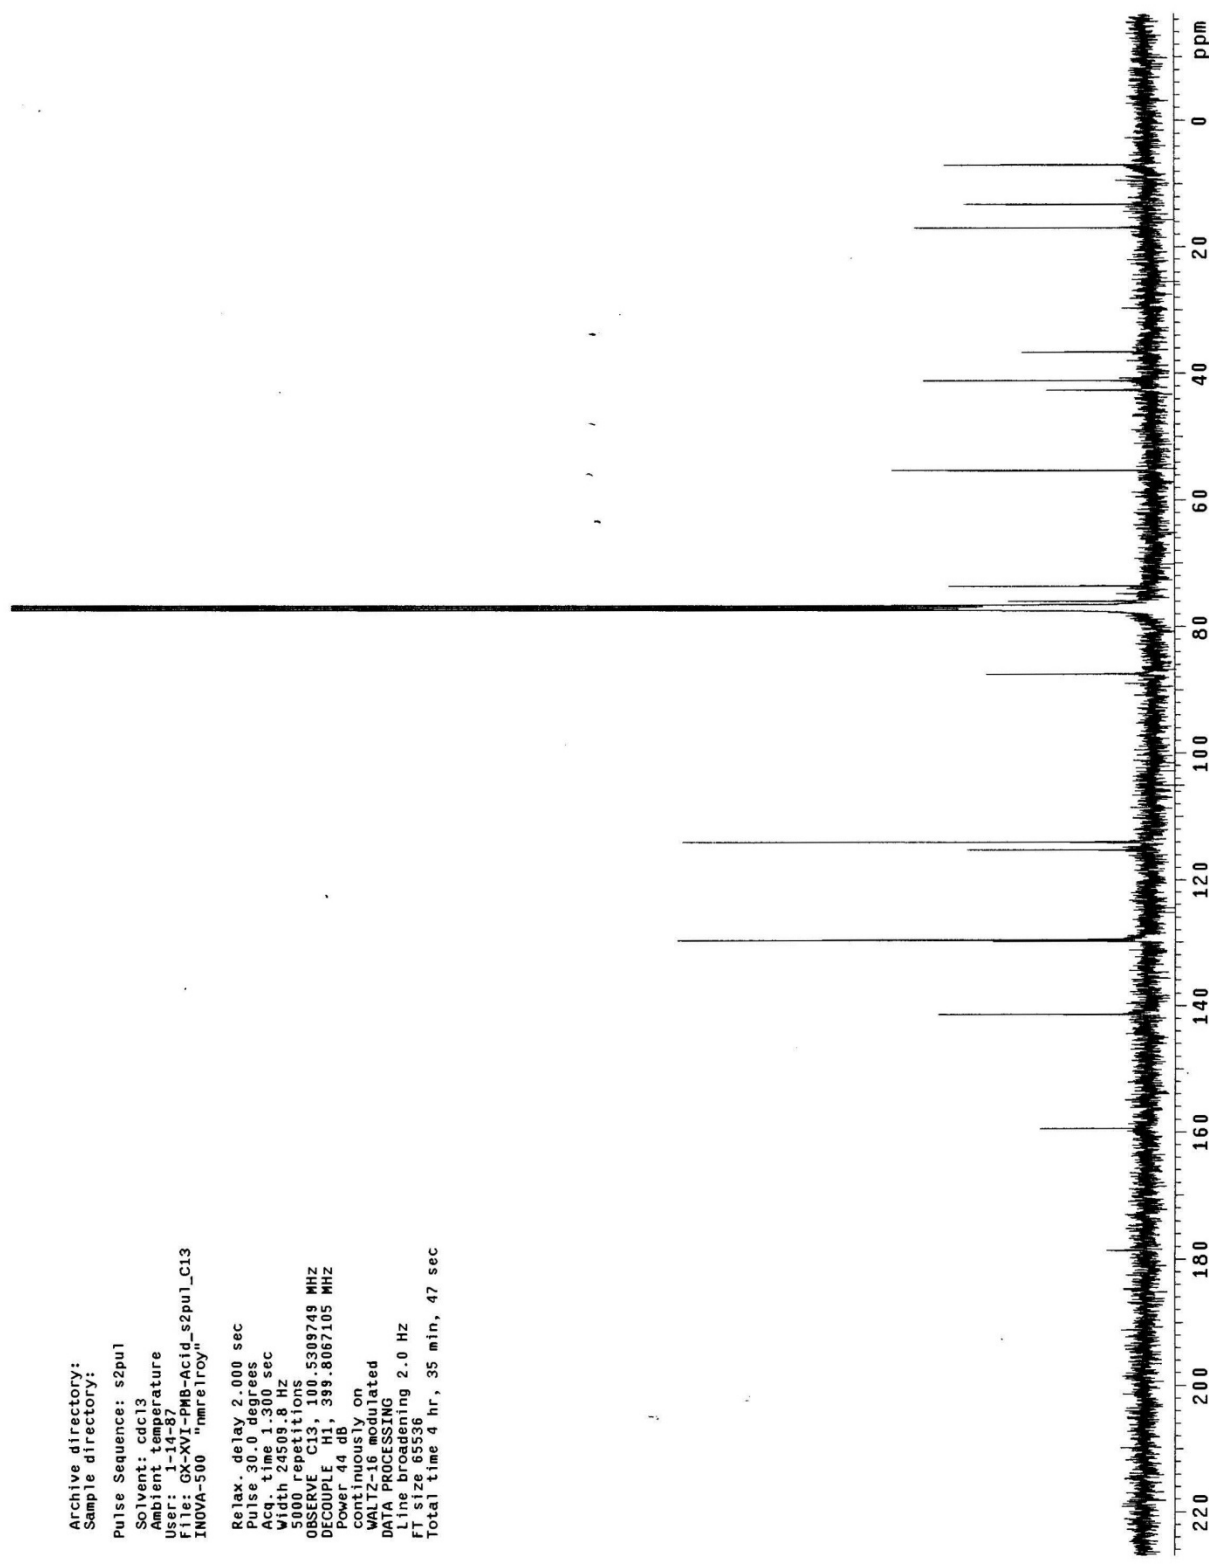

**(R)-2-((2S,4S,5R,6S)-6-((S)-but-3-en-2-yl)-2-(4-methoxyphenyl)-5-methyl-1,3-dioxan-4-yl)propanoic acid**

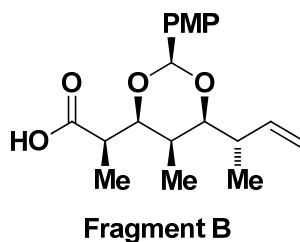

A solution of (2*R*,3*S*,4*S*,5*S*,6*S*)-3-hydroxy-5-((4-methoxybenzyl)oxy)-2,4,6-trimethyloct-7-enoic acid (148.4 mg, 0.441 mmol, 100 mol%) and 4Å molecular sieves (480.5 mg) in DCM (8.82 mL, 0.05 M) was cooled to 0 °C. To this solution was added DDQ (120.1 mg, 0.529 mmol, 120 mol%) in three portions. The reaction was stirred at 0 °C for 1 hr. The reaction mixture was loaded on to the column directly. Purification by column chromatography (SiO<sub>2</sub>; ethyl acetate: hexanes, 1:3) gave the title compound (118.0 mg, 0.353 mmol) as a colorless oil in 80% yield.

**TLC (SiO<sub>2</sub>):** R<sub>f</sub> = 0.69 (ethyl acetate:hexanes, 1:1).

**<sup>1</sup>H NMR**(400 MHz, CDCl<sub>3</sub>): δ 7.42-7.40 (m, 2H), 6.90-6.88 (m, 2H), 5.97 (ddd, *J* = 17.2, 10.4, 6.4 Hz, 1H), 5.48 (s, 1H), 5.08 (dt, *J* = 17.2, 1.6 Hz, 1H), 5.03 (dt, *J* = 10.4, 1.6 Hz, 1H), 3.88 (dd, *J* = 10.0, 2.0 Hz, 1H), 3.80 (s, 3H), 3.50 (dd, *J* = 10.0, 2.0 Hz, 1H), 2.85 (qdd, *J* = 6.8, 6.4, 2.0 Hz, 1H), 2.44 (qd, *J* = 6.8, 3.2 Hz, 1H), 1.80 (qd, *J* = 6.8, 2.0 Hz, 1H), 1.38 (d, *J* = 6.8 Hz, 3H), 1.02 (d, *J* = 6.8 Hz, 3H), 0.97 (d, *J* = 6.8 Hz, 3H).

**<sup>13</sup>C NMR**(100 MHz, CDCl<sub>3</sub>): δ 178.7, 159.9, 141.6, 131.1, 127.2, 114.0, 113.5, 101.3, 84.5, 81.8, 55.3, 41.7, 38.3, 29.7, 14.9, 14.3, 6.0.

**[α]<sub>D</sub><sup>25</sup>** = -90.2 (c = 0.36, CH<sub>2</sub>Cl<sub>2</sub>).

**FTIR** (neat): ν 3334, 3255, 2970, 2922, 2852, 1737, 1645, 1557, 1517, 1375, 1302, 1170, 1132, 1104, 1033, 1011, 976, 914, 828, 668.

**HRMS:** (CI) Calcd. for C<sub>19</sub>H<sub>27</sub>O<sub>5</sub> [M+H]<sup>+</sup>: 335.1859, Found: 335.1855.

Archive directory:  
Sample directory:  
Pulse Sequence: s2pul  
Solvent: cdc13  
Ambient temperature  
File: FF-Sc1-8\_s2pul\_H1  
INOVA-500 "nmrel1roy"  
Relax. delay 2.000 sec  
Pulse 30.0 degrees  
Acq. time 4.000 sec  
Width 6410.3 Hz  
64 repetitions  
OBSERVE H1, 399.8047115 MHz  
DATA PROCESSING  
Line broadening 0.1 Hz  
F1 size 65536  
Total time 6 min, 36 sec

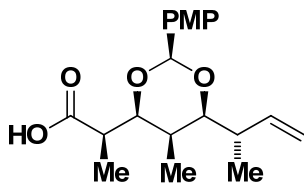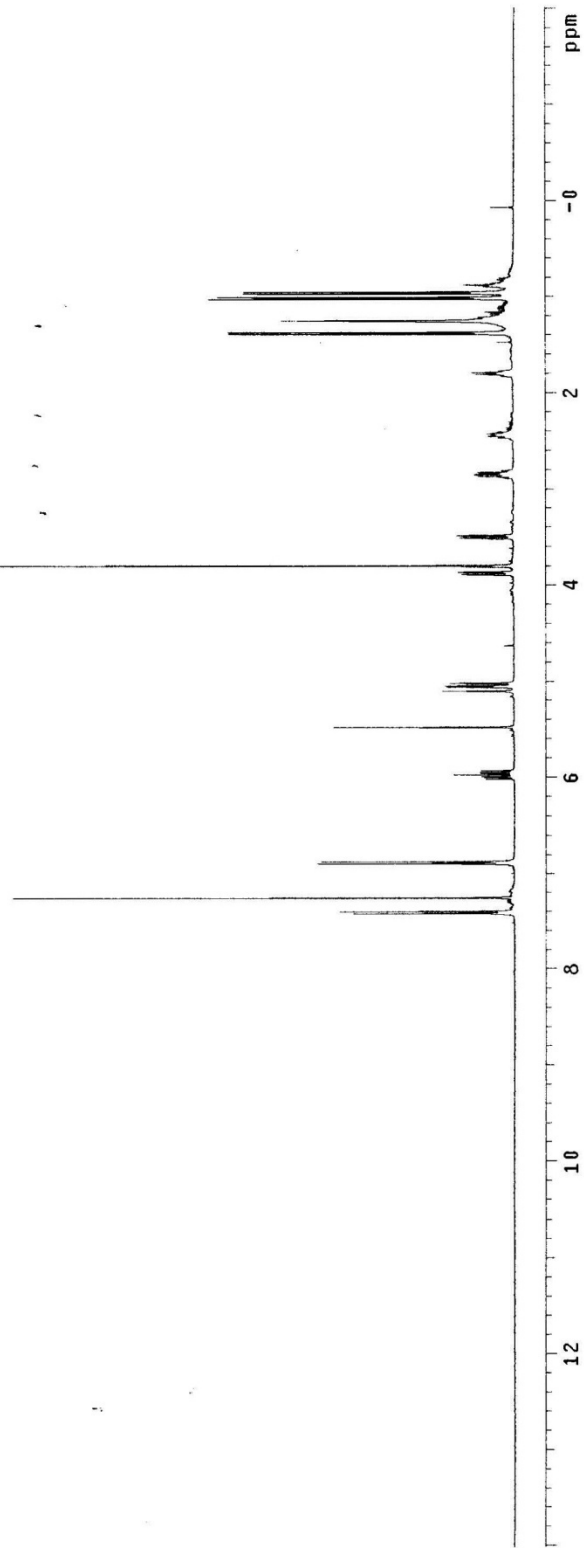

Archive directory:  
Sample directory:  
Pulse Sequence: s2pul  
Solvent: cdcl3  
Ambient temperature  
User: 1-14-87  
File: FF-Sci-8\_s2pul\_C13  
INOVA-500 "nmraastro"

Relax. delay 2.000 sec  
Pulse 30.0 degrees  
Acq. time 1.300 sec  
Width 24509.8 Hz  
5000 repetitions  
OBSERVE C13, 100.5309747 MHZ  
DECOUPLE H1, 399.8067105 MHZ  
Power 48 dB  
Continuously on  
WAITZ, unrelaxed  
DATA PROCESSING  
Line broadening 2.0 HZ  
FI size 85536  
Total time 4 hr, 35 min, 47 sec

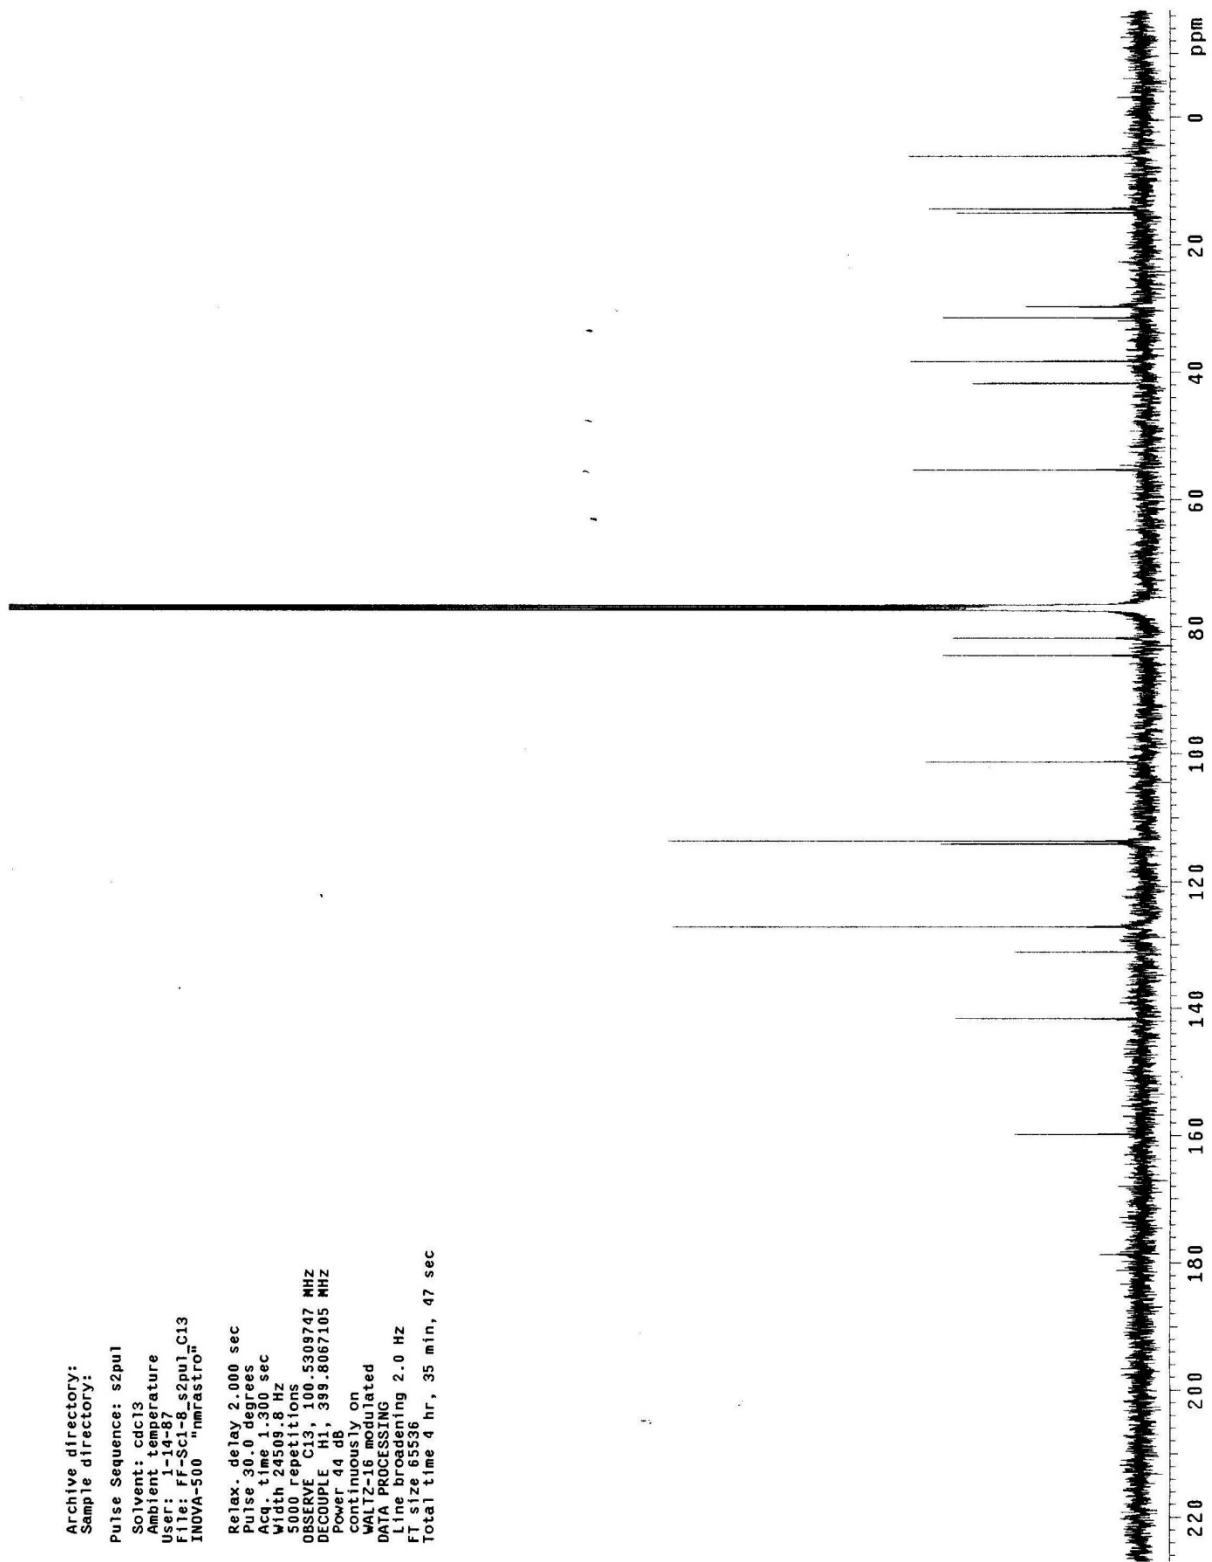

## Procedure and Spectral Data for Alcohol Fragment Synthesis (Fragment A)

*tert*-Butyldimethyl(((3*R*,4*R*)-4-methylhex-5-en-3-yl)oxy)silane<sup>1</sup>

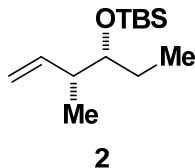

To a resealable pressure tube equipped with a magnetic stir bar was added RuH<sub>2</sub>(CO)(PPh<sub>3</sub>)<sub>3</sub> (321.5 mg, 0.35 mmol, 7 mol%), (*S*)-SEGPHOS (213.5 mg, 0.35 mmol, 7 mol%), TADDOL-phosphoric acid (488 mg, 0.7 mmol, 14 mol%). The tube was sealed with a rubber septum and purged with argon. Propanol (382.5  $\mu$ L, 5.0 mmol, 100 mol%) and acetone (5.0 mL, 1.0 M concentration with respect to alcohol) were added and the solution was cooled to -78 °C. Butadiene (1.69 mL, 20.0 mmol, 400 mol%) was quickly added and the rubber septum was quickly replaced with a screw cap. The mixture was heated at 95 °C (oil bath temperature) for 3 days, at which point the reaction mixture was allowed to cool to ambient temperature. TBSCl (1.507 g, 10.0 mmol, 200 mol%) and imidazole (0.851 g, 12.5 mmol, 250 mol%) were added and the reaction mixture was diluted with DMF (25 mL) and stirred under 70 °C for another 15 hours. Aqueous CuSO<sub>4</sub> solution was added and the reaction mixture was extracted with ether (20 mL  $\times$  3). Combined organic layer was dried *in vacuo* and purified by flash column chromatography (SiO<sub>2</sub>; hexanes) to furnish the title compound (673.9 mg, 2.95 mmol, *syn:anti* = 4.7:1, 98% ee) as a colorless oil in 59% yield.

**TLC (SiO<sub>2</sub>):** R<sub>f</sub> = 0.64 (hexanes).

**<sup>1</sup>H NMR** (400 MHz, CDCl<sub>3</sub>):  $\delta$  5.83 (ddd, *J* = 17.6, 10.4, 7.2 Hz, 1H), 5.02-4.96 (m, 2H), 3.51-3.44 (m, 1H), 2.35-2.26 (m, 1H), 1.46-1.37 (m, 2H), 0.96 (d, *J* = 7.2 Hz, 1H), 0.90 (s, 9H), 0.86 (t, *J* = 7.2 Hz, 1H), 0.04 (s, 6H).

**<sup>13</sup>C NMR** (100 MHz, CDCl<sub>3</sub>):  $\delta$  141.8, 113.6, 76.7, 42.3, 26.5, 25.9, 15.0, 9.5, -4.3, -4.4.

**FTIR** (neat):  $\nu$  2956, 2927, 1462, 1251, 771.

**$[\alpha]_D^{25}$**  = +20.8 (*c* = 1.1, CH<sub>2</sub>Cl<sub>2</sub>).

<sup>1</sup> Narasimhulu, C. P.; Das, P. *Synthesis*, **2009**, 474.

**HPLC** Enantiomeric excess was determined by HPLC analysis of the 4-nitrobenzoate derivative of the product (Chiralcel AD-H column, hexanes:*i*-PrOH = 99:1, 0.5 mL/min, 254 nm),  $t_{\text{major}} = 55.3$  min,  $t_{\text{minor}} = 66.0$  min; ee = 98%.



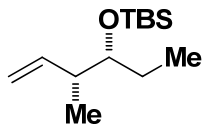

Archive directory:  
 Sample directory:  
 Pulse Sequence: s2pu1  
 Solvent: cdcl3  
 Ambient temperature  
 File: CX-XI-76\_S2pu1\_H1  
 INOVA-500 1mmre1roy  
 Relax. delay 2.000 sec  
 Pulse 30.0 degrees  
 Acq. time 4.000 sec  
 Width 6410.3 Hz  
 Observed frequency  
 OBSERVED F1 399.8047105 MHz  
 DATA PROCESSING  
 Line broadening 0.1 Hz  
 FI size 65536  
 Total time 6 min, 36 sec

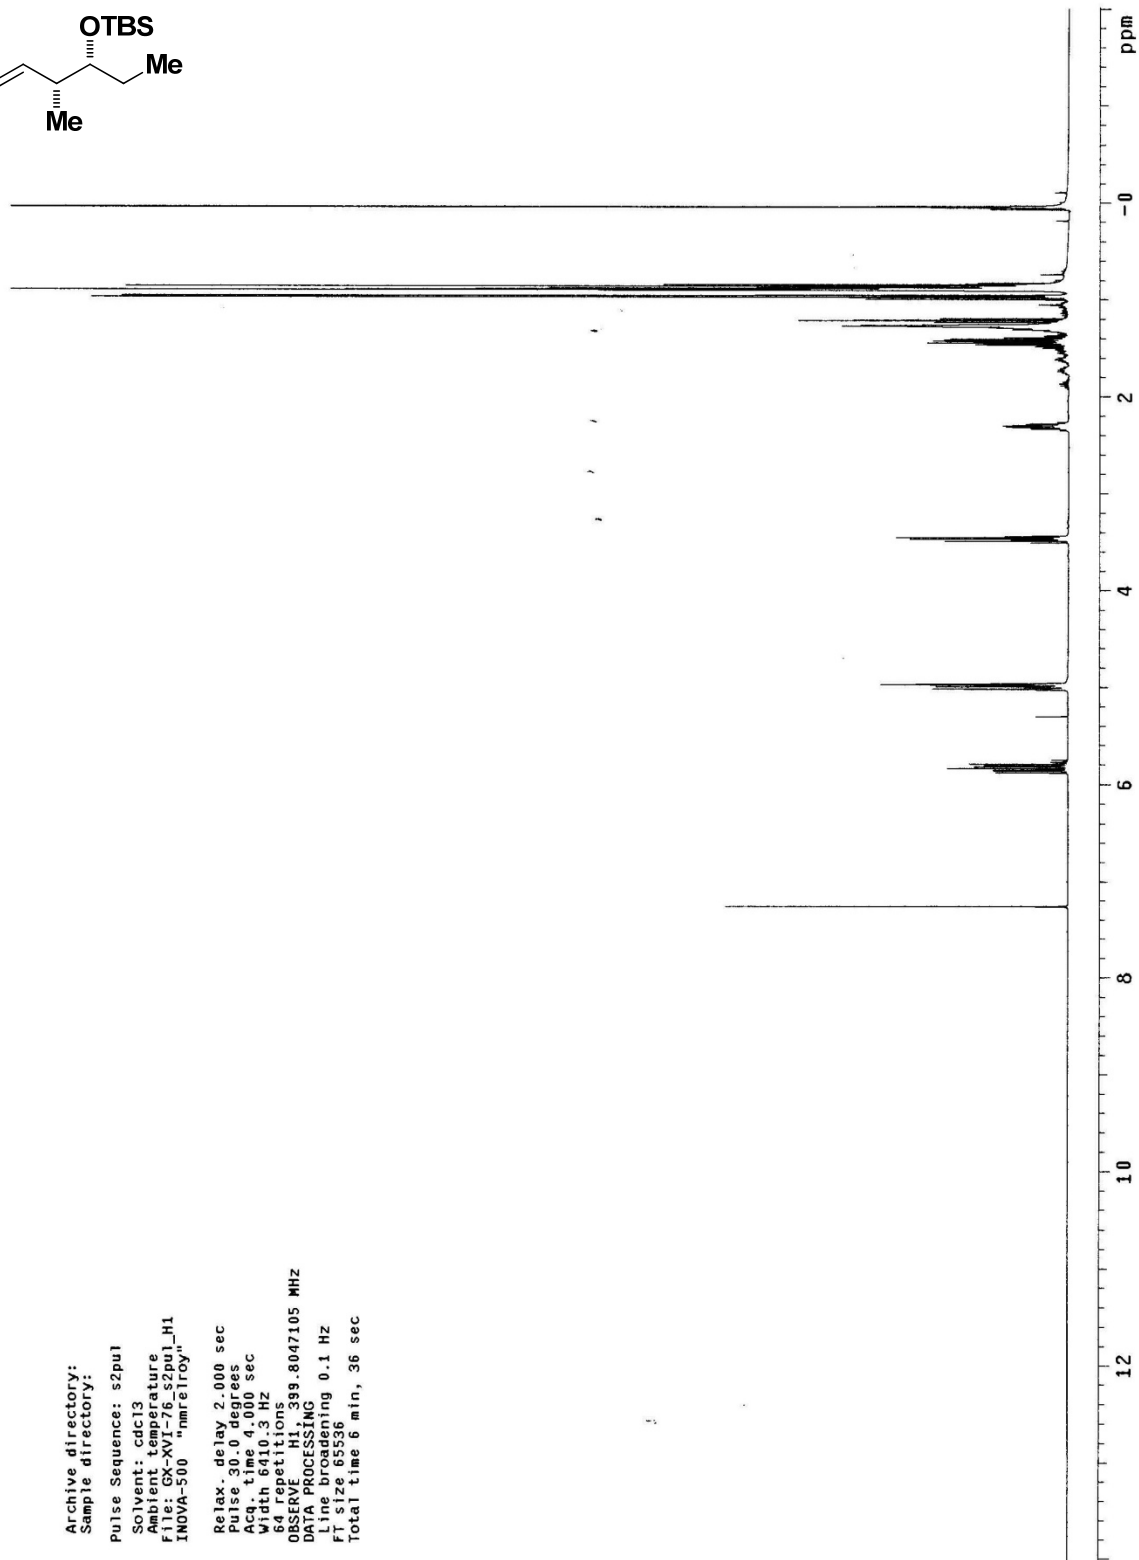

Archive directory:  
Sample directory:  
Pulse Sequence: s2pul  
Solvent: cdc13  
Ambient temperature  
User: 1-14-87  
File: GA-XVI-76\_s2pul\_C13  
INOVA-500 -mmrelroy

Relax. delay 2.000 sec  
Pulse 30.0 degrees  
Acq. time 1.300 sec  
Width 24509.8 Hz  
SQUELCH 30.000000  
SERVE repetitions 5309734 MHz  
DECOUPLE H3, 399.8067105 MHz  
Power 44 dB, 399.8067105 MHz  
continuously on  
WALTZ-16 modulated  
DATA PROCESSING  
Line broadening 2.0 Hz  
FI size 65536  
Total time 4 hr, 35 min, 47 sec

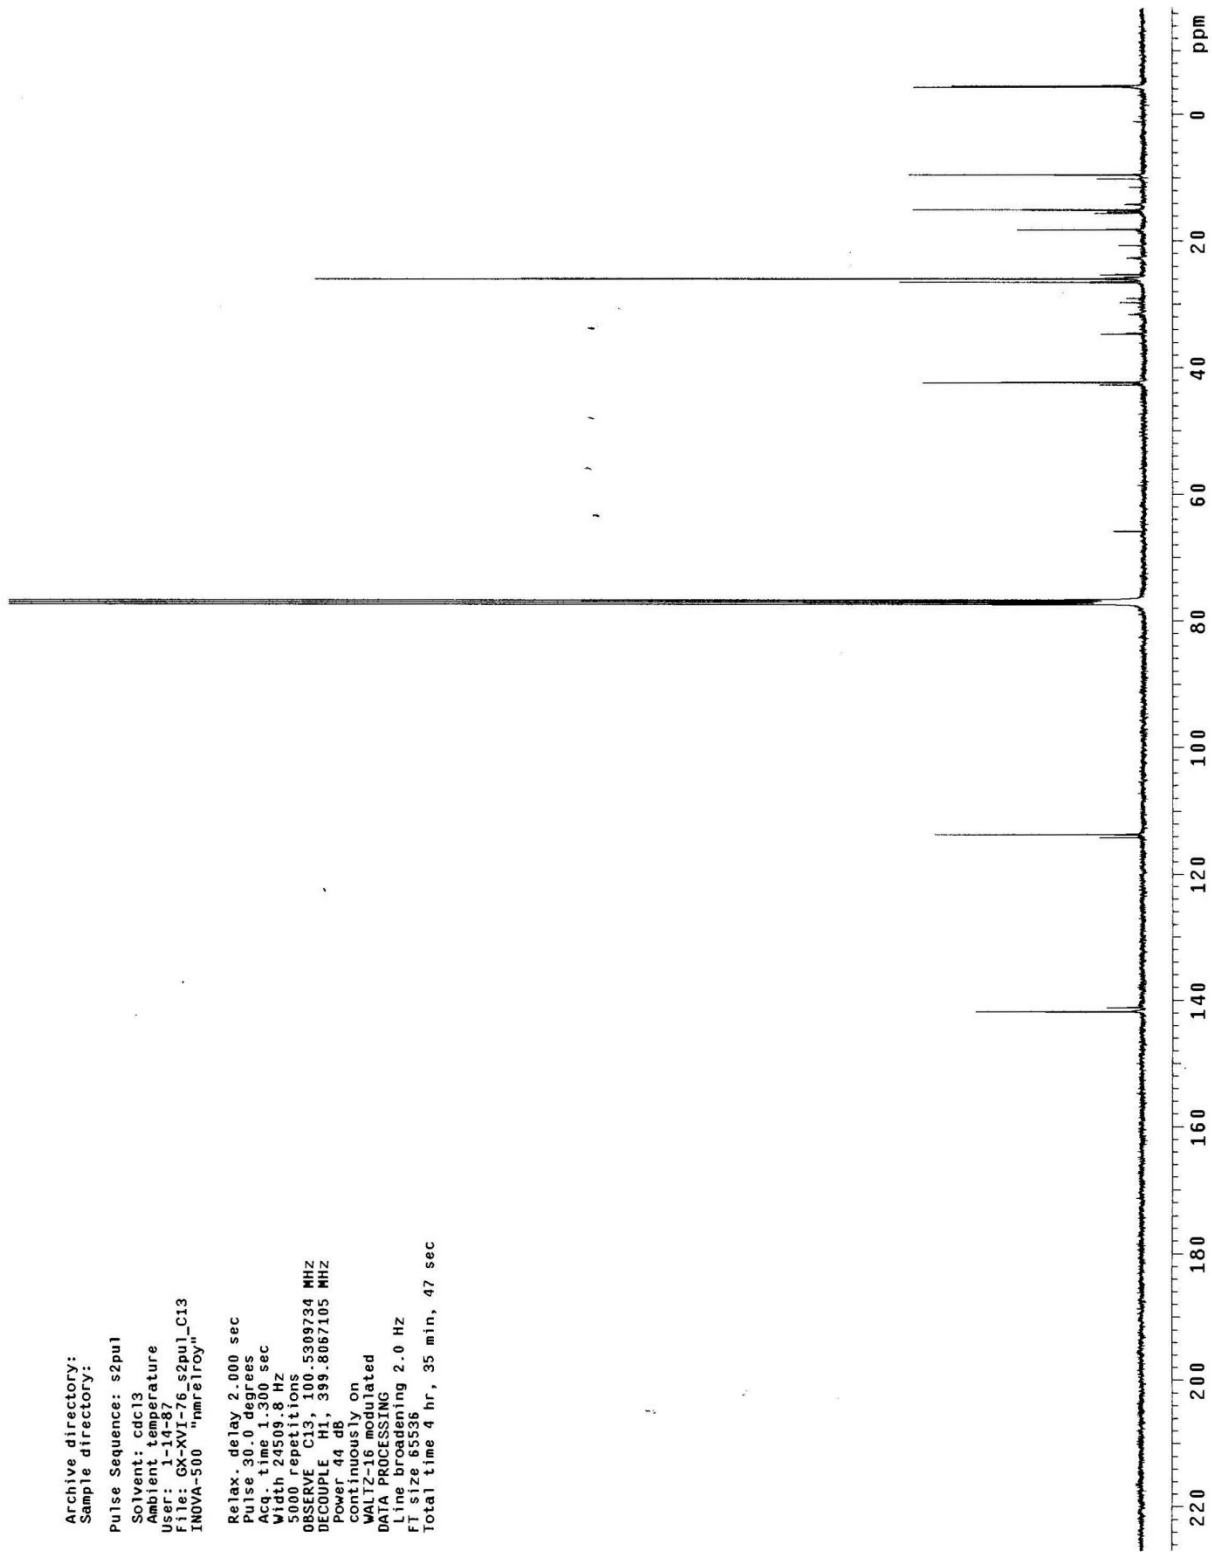

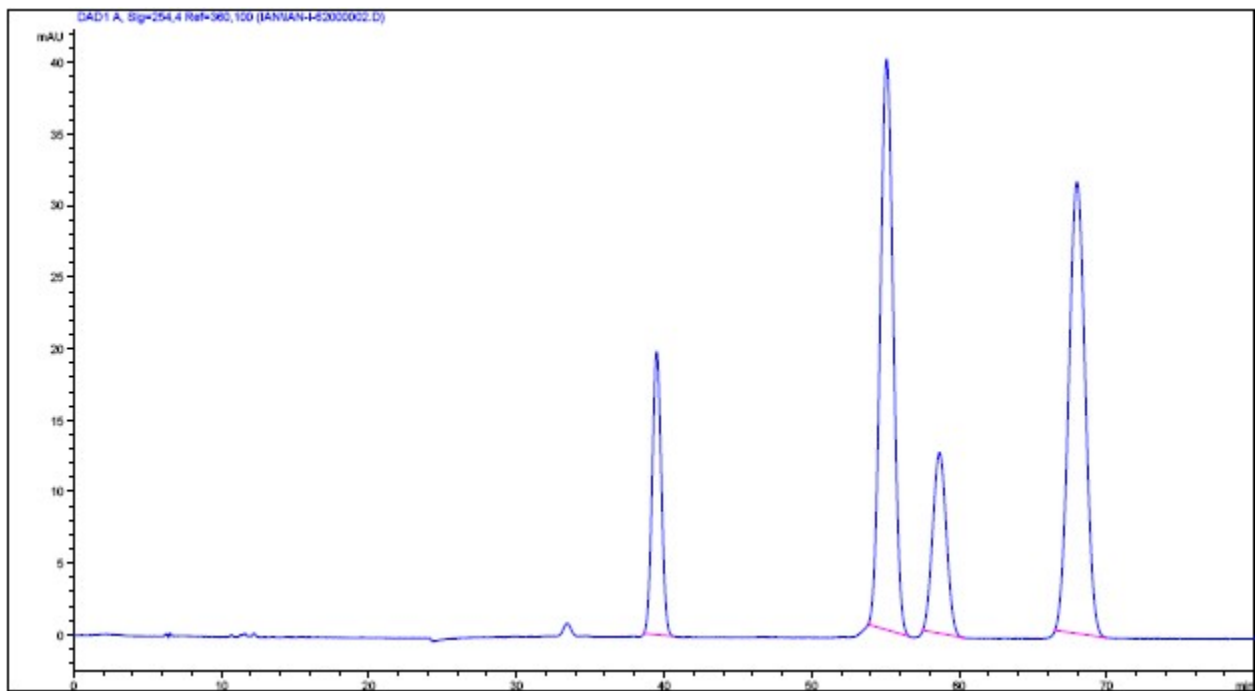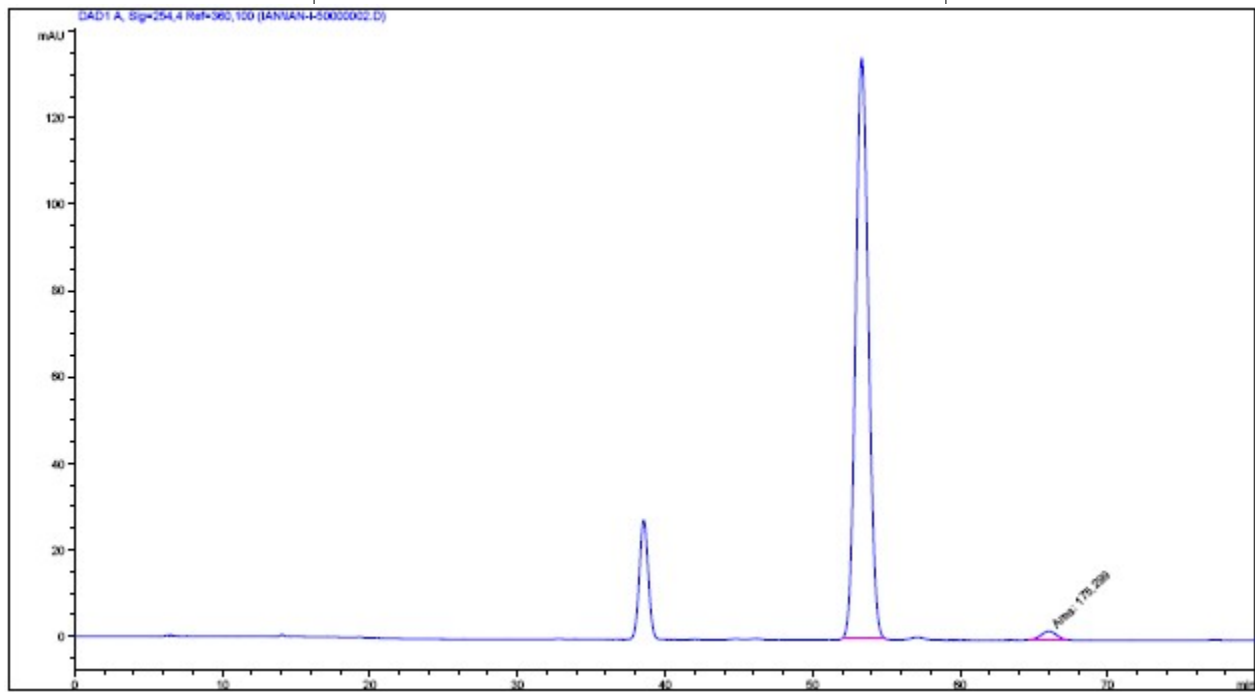

**(2*S*,3*R*)-3-((*tert*-butyldimethylsilyl)oxy)-2-methylpentanal**

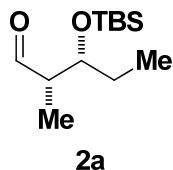

An oven-dried round bottom flask under an atmosphere of N<sub>2</sub> was charged with *tert*-Butyldimethyl(((3*R*,4*R*)-4-methylhex-5-en-3-yl)oxy)silane (290 mg, 1.27 mmol, 100 mol%), 2,6-lutidine (271.9 mg, 2.54 mmol, 200 mol%), and THF:H<sub>2</sub>O (12.7 mL, 3:1, 0.1 M). OsO<sub>4</sub> in *t*-butanol (0.76 mL, 0.05M, 0.038 mmol, 3 mol%) was added under 0 °C. After being stirring for 5 min, solid NaIO<sub>4</sub> (542.9 mg, 2.54 mmol, 200 mol%) was added in one portion. Stirring was continued for another 12 hr followed by saturated aqueous Na<sub>2</sub>S<sub>2</sub>O<sub>3</sub> (20 mL) was added. The reaction mixture was stirred vigorously for 15 min and then transferred to a separatory funnel. The aqueous phase was extracted with ethyl acetate (3 × 30 mL). The combined organic extracts were dried (MgSO<sub>4</sub>), filtered and concentrated under reduced pressure. The residue was run through a silica plug to give the title compound (262 mg, 0.977 mmol) as a colorless oil in 77% yield and used in the next step without further purification.

**TLC (SiO<sub>2</sub>):** R<sub>f</sub> = 0.63 (hexanes:ethyl acetate, 10:1).

**<sup>1</sup>H NMR**(400 MHz, CDCl<sub>3</sub>): δ 9.77 (d, *J* = 0.8 Hz, 1H), 4.03 (ddd, *J* = 10.4, 7.2, 3.6 Hz, 1H), 2.47 (qdd, *J* = 7.2, 3.6, 0.8 Hz, 1H), 1.60-1.47 (m, 3H), 1.05 (d, *J* = 7.2 Hz, 3H), 0.89 (t, *J* = 7.2 Hz, 3H), 0.86 (s, 9H), 0.06 (s, 3H), 0.04 (s, 3H).

**FTIR** (neat): ν<sub>2980</sub>, 2977, 2962, 1710, 1458, 1231, 998, 960, 822, 771, 654.

GX-XVI-64

Pulse Sequence: s2pu1  
Solvent: CDCl3  
Ambient temperature  
Mercury-400BB "nmr6"

Relax. delay 2.000 sec  
Pulse 16.4 degrees  
Acq. time 2.956 sec  
Width 5602.2 Hz  
8 repetitions  
OBSERVE H1, 400.2669779 MHz  
DATA PROCESSING  
Line broadening 0.1 Hz  
FT size 32768  
Total time 7 min, 29 sec

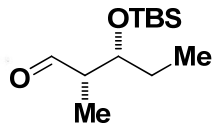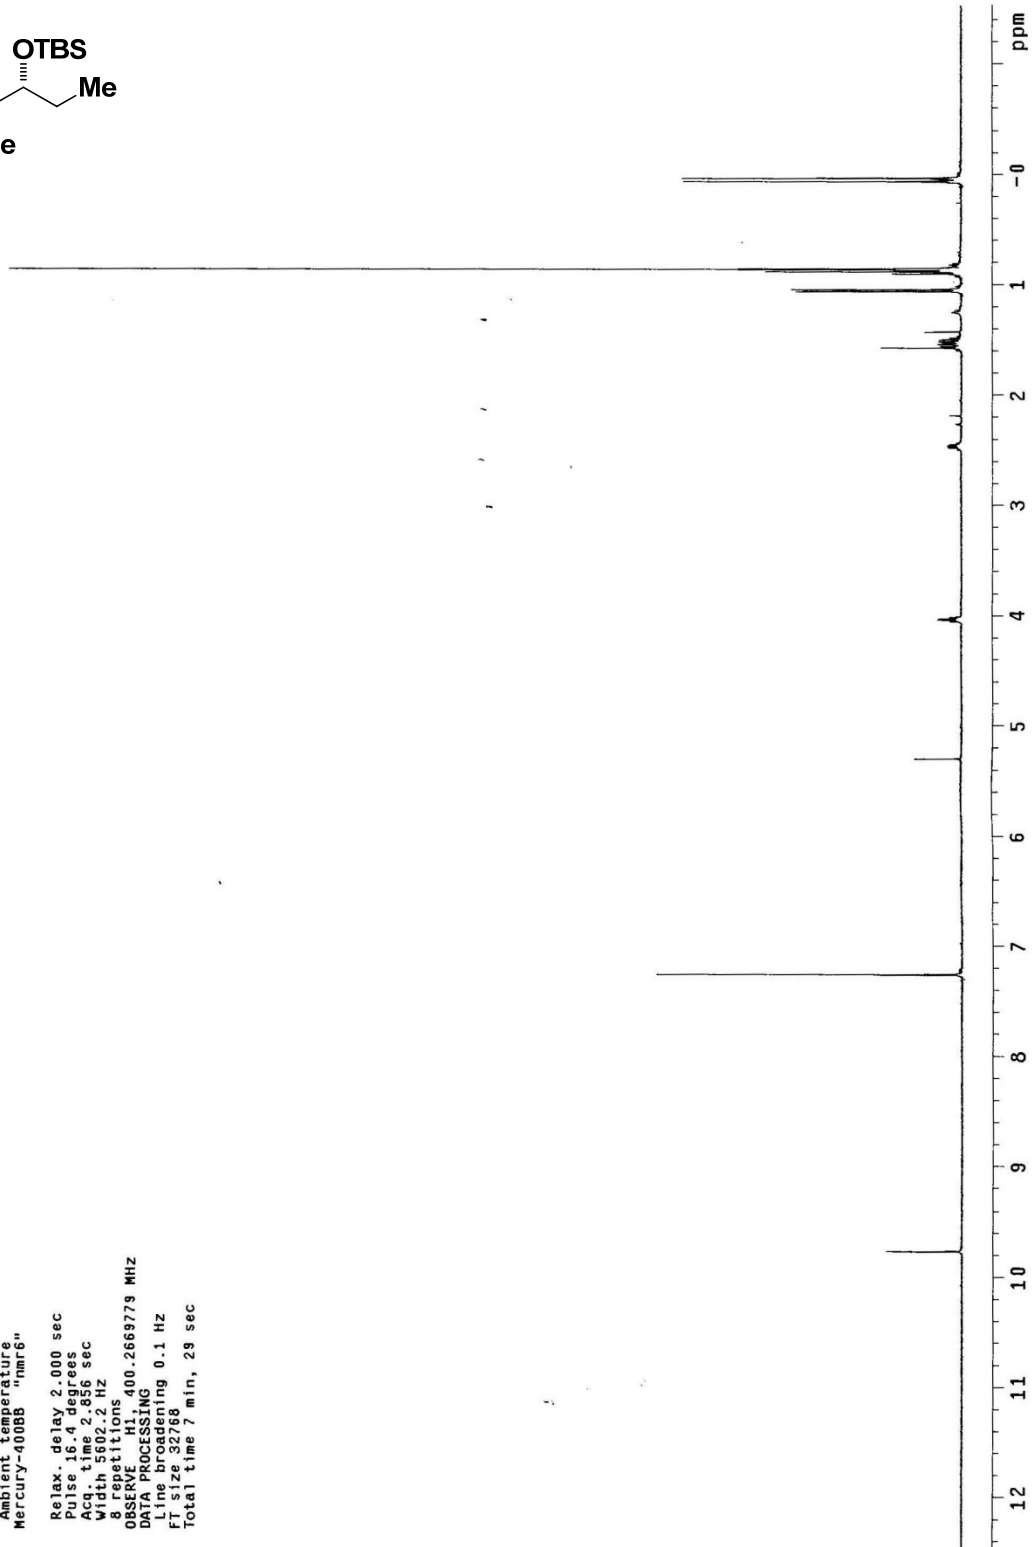

**(2*R*,3*S*,4*R*,5*R*)-*S*-phenyl 5-((*tert*-butyldimethylsilyl)oxy)-3-hydroxy-2,4-dimethylheptanethioate**

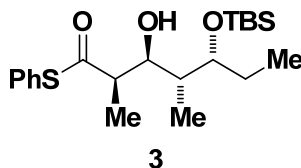

An oven-dried round bottom flask under an atmosphere of N<sub>2</sub> was charged with *S*-phenyl propanethioate (170 mg, 1.0 mmol, 150 mol%) and ether (0.5 mL). 9-BBNOTf solution (2.0 mL, 0.5 M, 150 mol%) was added under 0 °C followed by triethylamine (0.186 mL, 1.2 mmol, 180 mol%). The bright yellow reaction mixture was stirred under room temperature for 30 min, and then cooled to -78 °C. (2*S*,3*R*)-3-((*tert*-butyldimethylsilyl)oxy)-2-methylpentanal (154 mg, 0.67 mmol, 100 mol%) in ether (0.5 mL, 0.7 M) was added to the reaction mixture. Stirring was continued for 1 hr then pH = 7 buffer (2 mL) was added. The layer was separated and the aqueous layer was extract with DCM (10 mL × 3). Combined organic layer was dried *in vacuo* and purified by flash column chromatography (SiO<sub>2</sub>; hexanes:ether = 11:1-8:1) to furnish the title compound (207.3 mg, 0.52 mmol) as a colorless oil in 78% yield.

**TLC (SiO<sub>2</sub>):** R<sub>f</sub> = 0.42 (ethyl acetate:hexanes, 1:9).

**<sup>1</sup>H NMR**(400 MHz, CDCl<sub>3</sub>): δ 7.43-7.39 (m, 5H), 4.10-4.08 (m, 1H), 3.94-3.90 (m, 1H), 3.76 (br, 1H), 2.87 (qd, *J* = 7.8, 3.2 Hz, 1H), 1.83-1.75 (m, 1H), 1.66-1.51 (m, 3H), 1.28 (d, *J* = 7.2 Hz, 3H), 0.91 (t, *J* = 6.4 Hz, 3H), 0.90 (s, 9H), 0.12 (s, 3H), 0.09 (s, 3H).

**<sup>13</sup>C NMR**(100 MHz, CDCl<sub>3</sub>): δ 201.2, 134.6, 129.3, 129.1, 127.6, 76.5, 74.2, 51.1, 38.7, 25.9, 25.8, 18.0, 11.5, 10.9, 10.2, -4.2, -4.5.

**[α]<sub>D</sub><sup>25</sup>** = -28.8 (c = 0.55, CH<sub>2</sub>Cl<sub>2</sub>).

**FTIR** (neat): ν<sub>2928</sub>, 2858, 1714, 1457, 1252, 1217, 1003, 954, 834, 774, 744, 688, 668.

**HRMS:** (CI) Calcd. for C<sub>21</sub>H<sub>37</sub>O<sub>3</sub>SSi [M+H]<sup>+</sup>: 397.3320, Found: 397.3318.

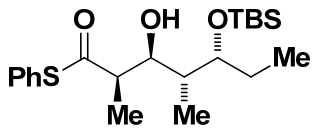

Archive directory:  
 Sample directory:  
 Pulse Sequence: s2pul  
 Solvent: cdc13  
 Ambient temperature  
 File: GX-XVI-67\_s2pul\_H1  
 INOVA-500 <sup>1</sup>Hmreloya  
 Relax. delay 2.000 sec  
 Pulse 30.0 degrees  
 Acq. time 4.000 sec  
 Width 6410.3 Hz  
 64 repetitions  
 OBSERVED F1 399.8047103 MHz  
 D1A PROCESSING  
 File browser  
 FT size 65536  
 Total time 6 min, 36 sec

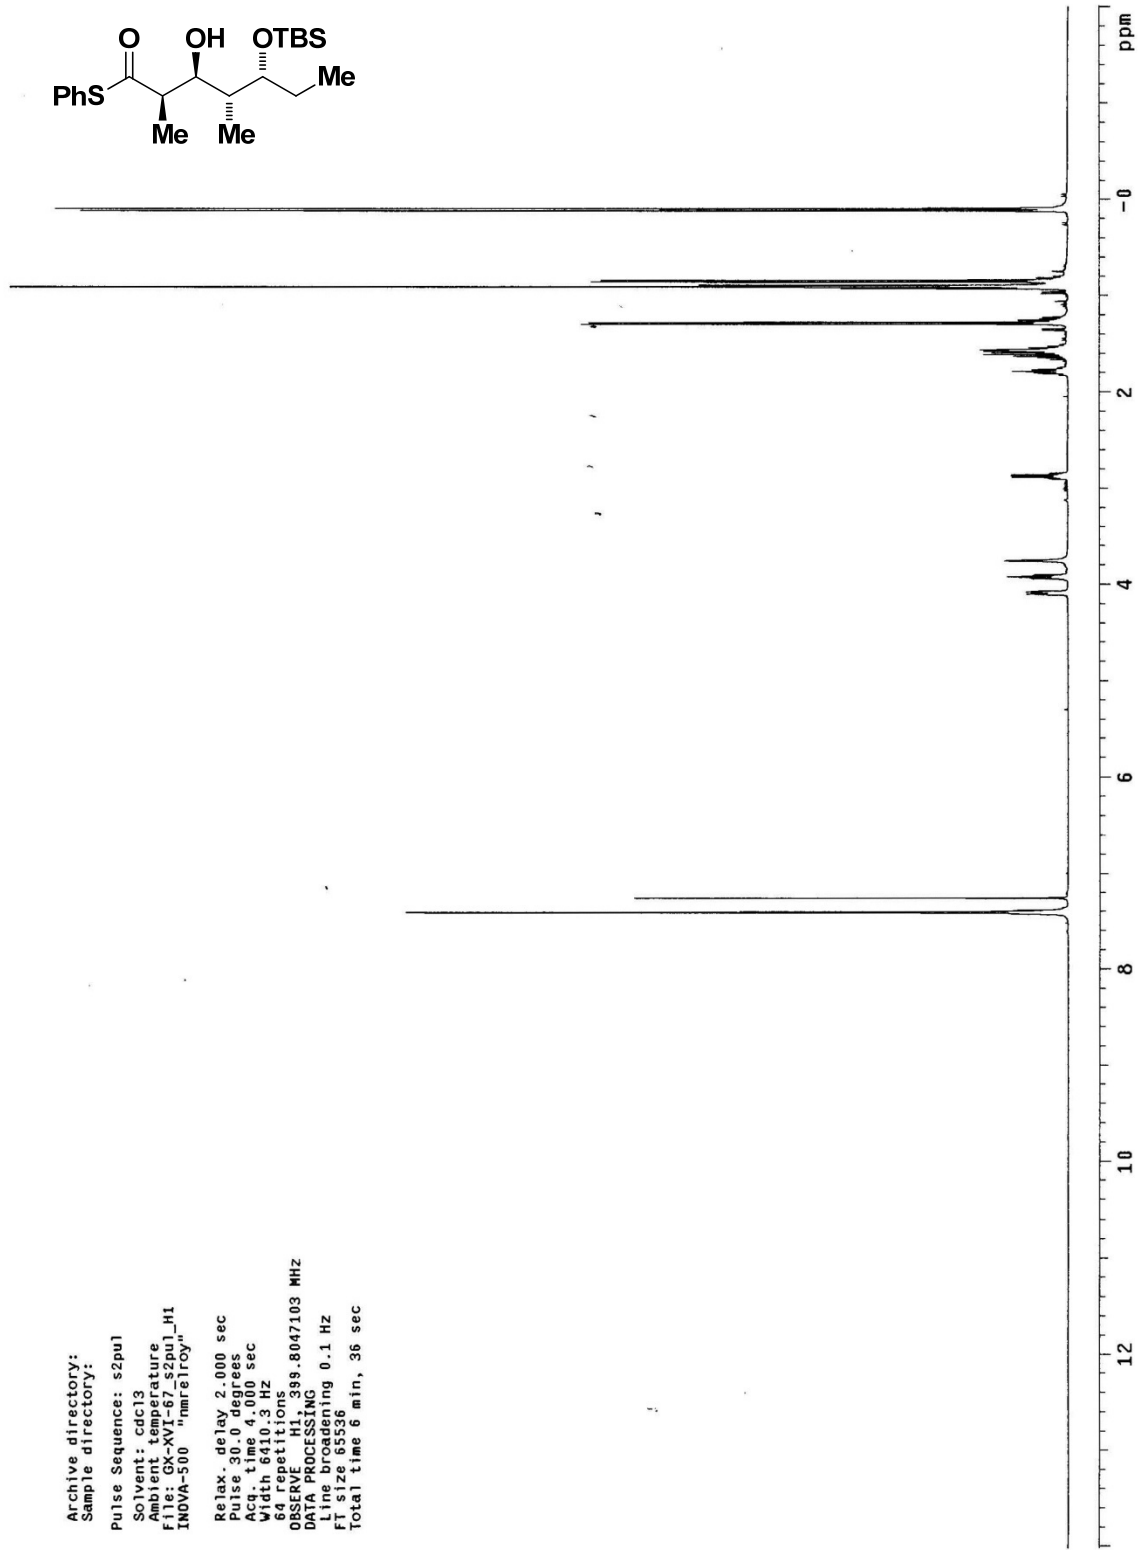

Archive directory:  
Sample directory:  
Pulse Sequence: s2pu1  
Solvent: cdc13  
Ambient temperature  
User: 1-14-87  
File: GX-XVI-87\_s2pu1\_C13  
INOVA-500 "mmre1roy"

Relax. delay 2.000 sec  
Pulse 30.0 degrees  
Acq. time 1.300 sec  
Width 24509.8 Hz  
5000 repetitions  
PULSE C13, 399.5308755 MHZ  
DECUPLE C13, 399.8087105 MHZ  
Power 44 dB  
continuously on  
WALTZ-16 modulated  
DATA PROCESSING  
Line broadening 2.0 Hz  
FT size 65536  
Total time 4 hr, 35 min, 47 sec

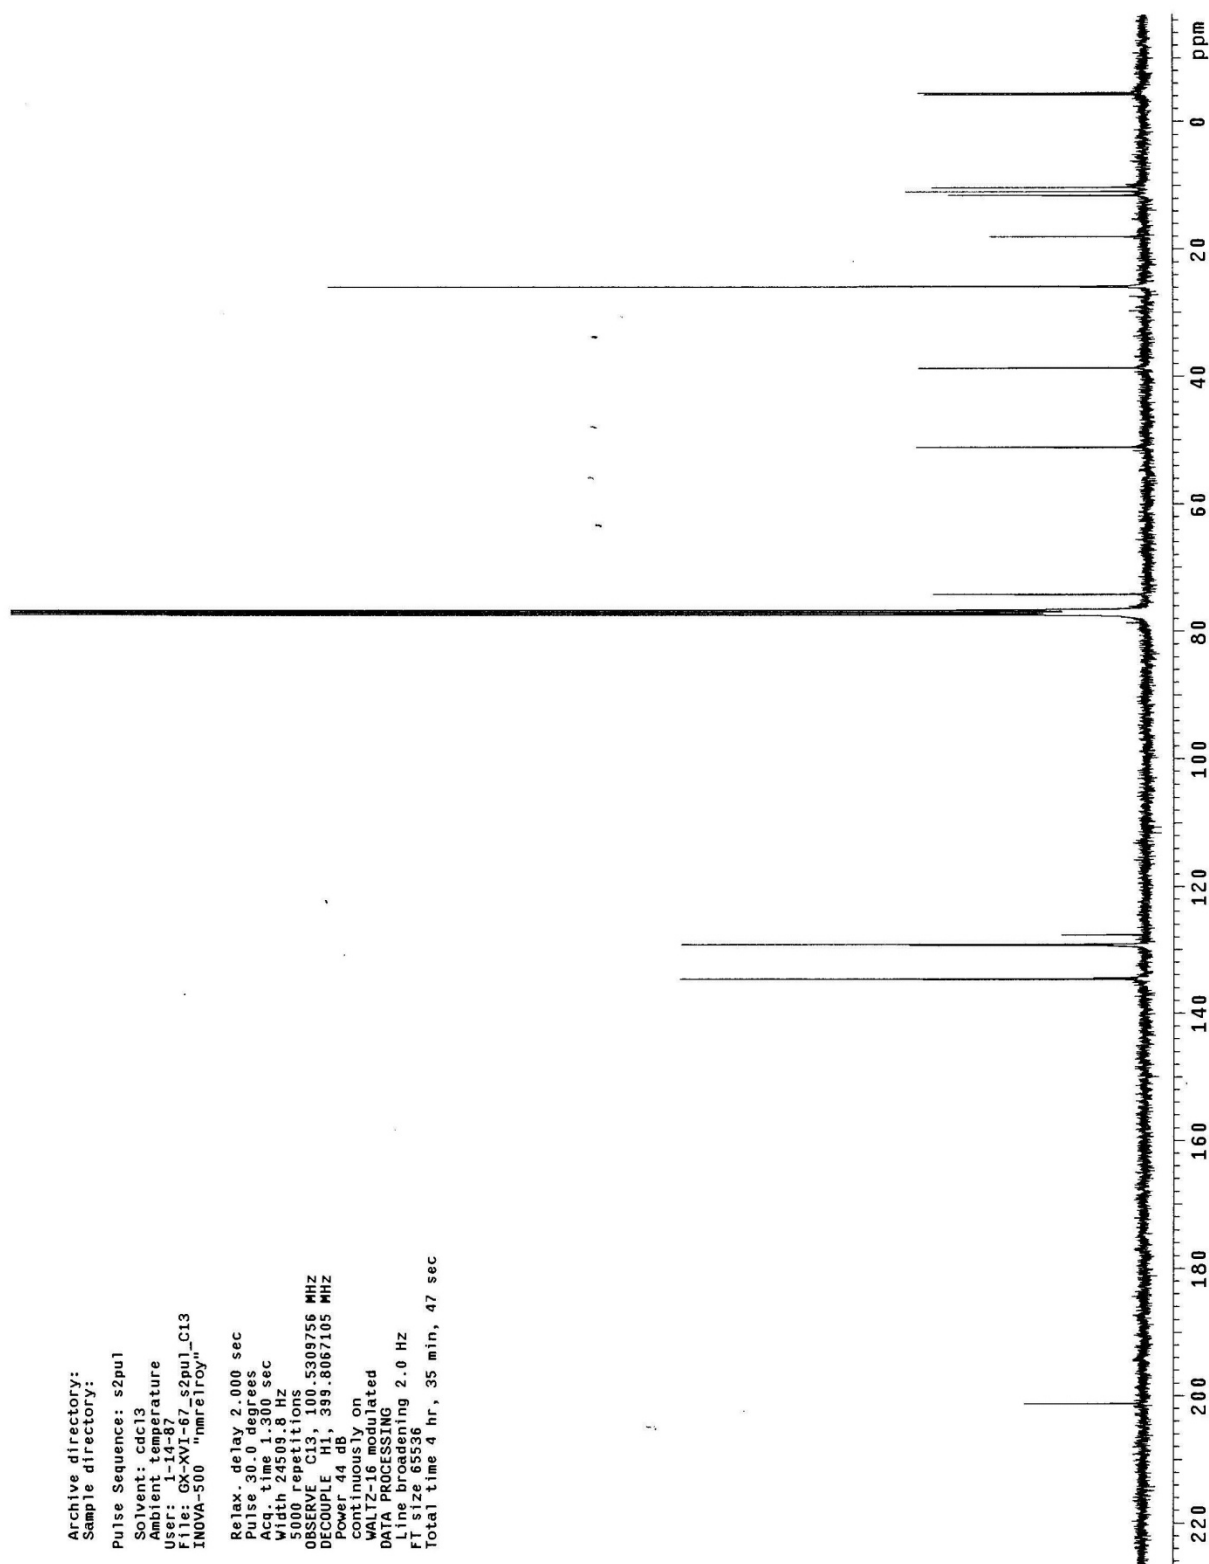



**(2*R*,3*S*,4*R*,5*R*)-5-((*tert*-butyldimethylsilyl)oxy)-3-hydroxy-2,4-dimethylheptanal**

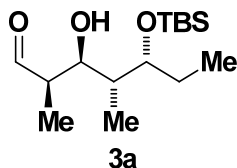

An oven-dried round bottom flask under an atmosphere of N<sub>2</sub> was charged with (2*R*,3*S*,4*R*,5*R*)-*S*-phenyl 5-((*tert*-butyldimethylsilyl)oxy)-3-hydroxy-2,4-dimethylheptanethioate (230 mg, 0.58 mmol, 100 mol%), 10% Pd/C (31 mg, 0.029 mmol, 5 mol%), and acetone (11.6 mL, 0.05M). Triethylsilane (0.930 mL, 5.8 mmol, 1000 mol%) was added in ten portions and the mixture was allowed to stir at room temperature until all starting material was consumed. The reaction mixture was run through a silica plug and concentrated *in vacuo* to give the title compound (142.2 mg, 0.49 mmol) as a colorless oil in 85% yield and used in the next step without further purification.

**TLC (SiO<sub>2</sub>):** R<sub>f</sub> = 0.42 (ethyl acetate:hexanes, 1:9).

**<sup>1</sup>H NMR**(400 MHz, CDCl<sub>3</sub>): δ9.77 (d, *J* = 0.4 Hz, 1H), 4.31 (dd, *J* = 10.0, 2.4 Hz, 1H), 4.27 (s, 1H), 3.72 (dt, *J* = 8.8, 3.2 Hz, 1H), 3.34 (qd, *J* = 6.8, 2.0 Hz, 1H), 1.91 (dq, *J* = 8.8, 7.2, 2.8 Hz, 1H), 1.68-1.52 (m, 2H), 1.12 (d, *J* = 7.2 Hz, 3H), 0.96 (t, *J* = 7.6 Hz, 3H), 0.90 (s, 9H), 0.79 (d, *J* = 7.2 Hz, 3H), 0.12 (s, 3H), 0.09 (s, 3H).

**FTIR** (neat): ν3349, 2963, 2928, 2856, 1713, 1459, 1384, 1249, 1148, 957, 931, 833, 772, 666.

Archive directory:  
Sample directory:

Pulse Sequence: s2pul

Solvent: cdc13  
Ambient temperature  
File: GX-XVI-71\_s2pul\_H1  
INDVA-500 "nmrelroy"

Relax. delay 2.000 sec  
Pulse 30.0 degrees  
Acq. time 4.000 sec  
Width 6410.3 Hz  
64 repetitions

OBSERVE H1, 399.8047103 MHz  
DATA PROCESSING  
Line broadening 0.1 Hz  
F1 size 63536  
Total time 6 min, 36 sec

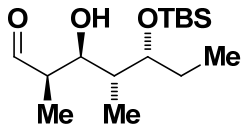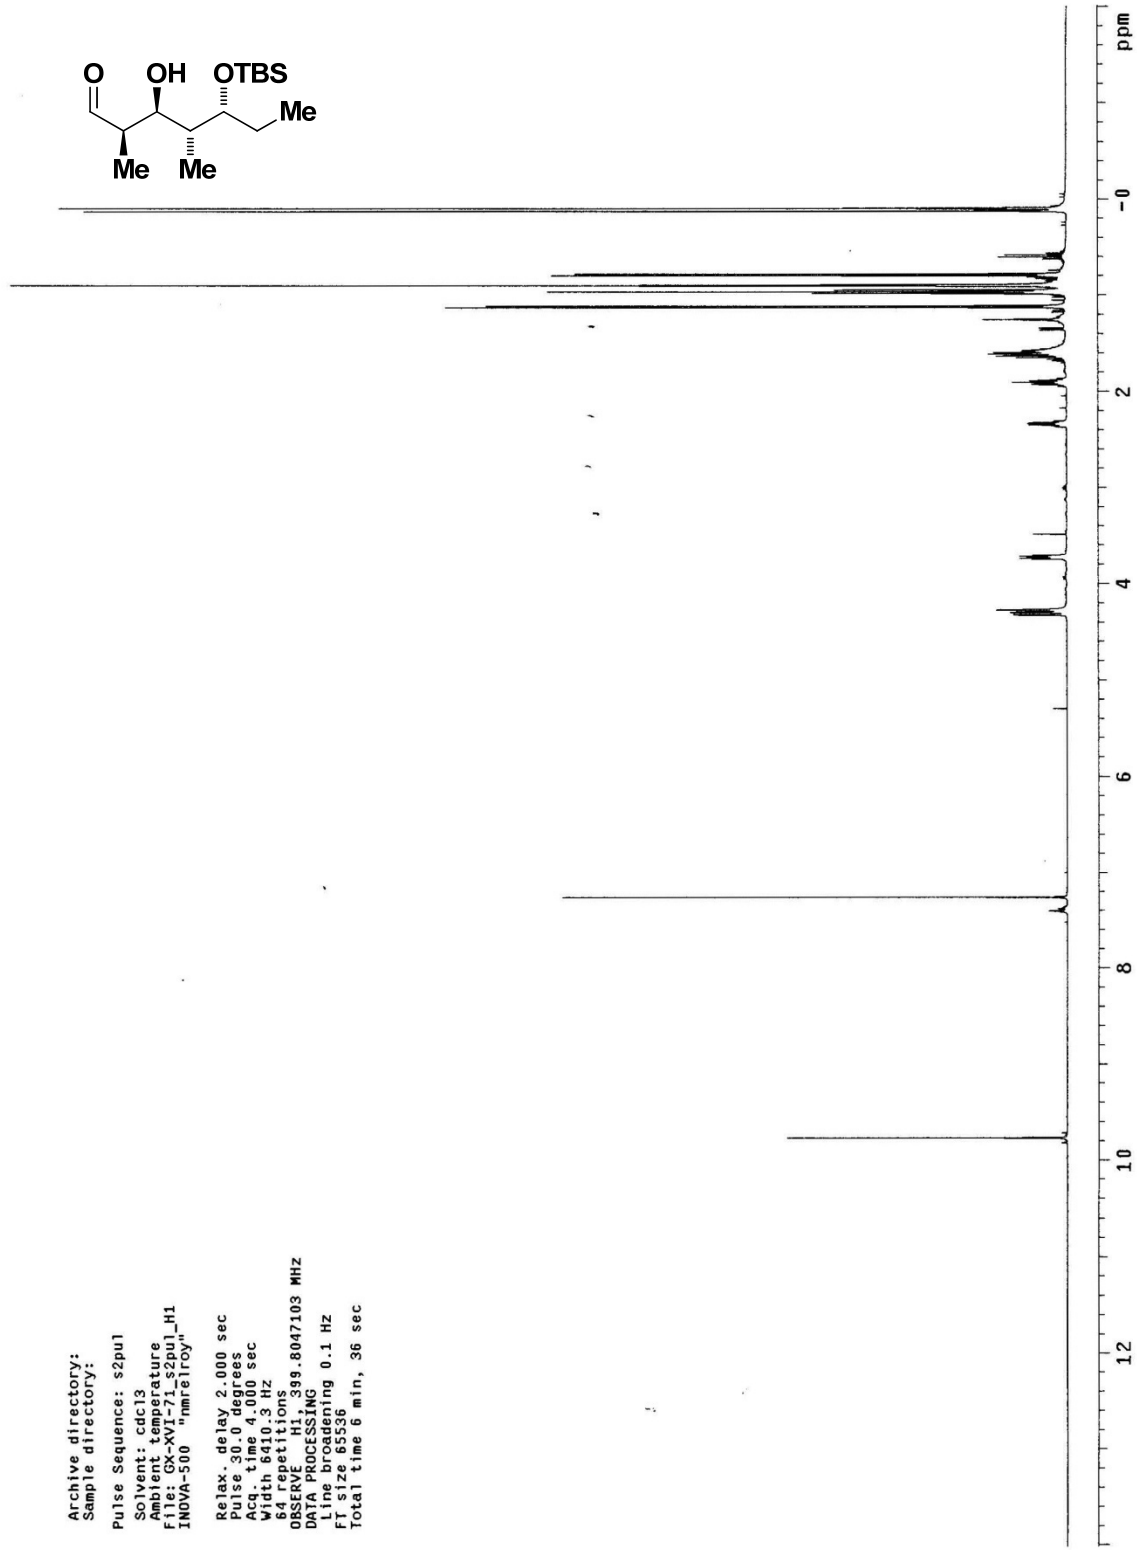

**(3*S*,4*R*,5*R*,6*R*)-6-((*tert*-butyldimethylsilyl)oxy)-3,5-dimethyloct-1-yn-4-ol**

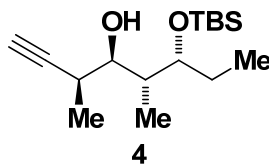

An oven-dried round bottom flask under an atmosphere of N<sub>2</sub> was charged with Ohira-Bestmann reagent (119.9 mg, 0.62 mmol, 300 mol%) and methanol (6 mL, 0.1 M). Solid K<sub>2</sub>CO<sub>3</sub> (86.2 mg, 0.62 mmol, 300 mol%) was added in one portion and the mixture was allowed to stir at room temperature for 30 min. The clear solution was transferred via syringe to another reaction flask with (2*R*,3*S*,4*R*,5*R*)-5-((*tert*-butyldimethylsilyl)oxy)-3-hydroxy-2,4-dimethylheptanal (60 mg, 0.21 mmol, 100 mol%) in THF (4.2 mL, 0.05 M) under 0 °C. The reaction was stirred for 1 hr and pH = 7 buffer (20 mL) was added. The layer was separated and the aqueous layer was extract with DCM (20 mL × 3). Combined organic layer was dried *in vacuo* and purified by flash column chromatography (SiO<sub>2</sub>; hexanes:ether = 9:1) to furnish the title compound (52.7 mg, 0.19 mmol) as a colorless oil in 89% yield.

**TLC (SiO<sub>2</sub>):** R<sub>f</sub> = 0.62 (ethyl acetate:hexanes, 1:9).

**<sup>1</sup>H NMR**(400 MHz, CDCl<sub>3</sub>): δ 3.90 (d, *J* = 4.0 Hz, 1H), 3.86 (td, *J* = 7.2, 2.0 Hz, 1H), 3.65 (p, *J* = 4.0 Hz, 1H), 2.58 (qdd, *J* = 7.2, 5.2, 2.4 Hz, 1H), 2.09 (d, *J* = 2.4 Hz, 1H), 1.93 (pd, *J* = 10.8, 2.4 Hz, 1H), 1.63-1.48 (m, 2H), 1.22 (d, *J* = 6.8 Hz, 3H), 0.89 (t, *J* = 6.4 Hz, 3H), 0.88 (s, 9H), 0.85 (d, *J* = 6.8 Hz, 3H), 0.10 (s, 3H), 0.09 (s, 3H).

**<sup>13</sup>C NMR**(100 MHz, CDCl<sub>3</sub>): δ 87.3, 77.3, 76.6, 69.2, 37.7, 29.9, 25.8, 25.6, 17.9, 14.4, 11.8, 10.8, -4.1, -4.6.

**[α]<sub>D</sub><sup>25</sup>** = -6.1 (c = 0.33, CH<sub>2</sub>Cl<sub>2</sub>).

**FTIR** (neat): ν 2928, 2858, 1714, 1457, 1252, 1217, 1003, 954, 834, 774, 744, 688, 668.

**HRMS:** (CI) Calcd. for C<sub>16</sub>H<sub>32</sub>O<sub>2</sub>Si [M]<sup>+</sup>: 284.3258, Found: 284.3253.

Archive directory:  
 Sample directory:  
 Pulse Sequence: s2pu1  
 Solvent: cdcl3  
 Ambient temperature  
 File: GX-XVI-74\_s2pu\_1\_H1  
 INOVA-500 "nmr1roy"  
 Relax. delay 2.000 sec  
 Pulse 30.0 degrees  
 Acq. time 4.000 sec  
 Width 6410.3 Hz  
 64 repetitions  
 OBSERVE H1, 399.8047103 MHz  
 DATA PROCESSING 0.1 Hz  
 Line averaging 0.1 Hz  
 FT size 65880  
 Total time 6 min, 36 sec

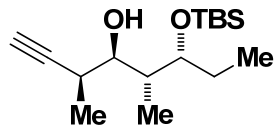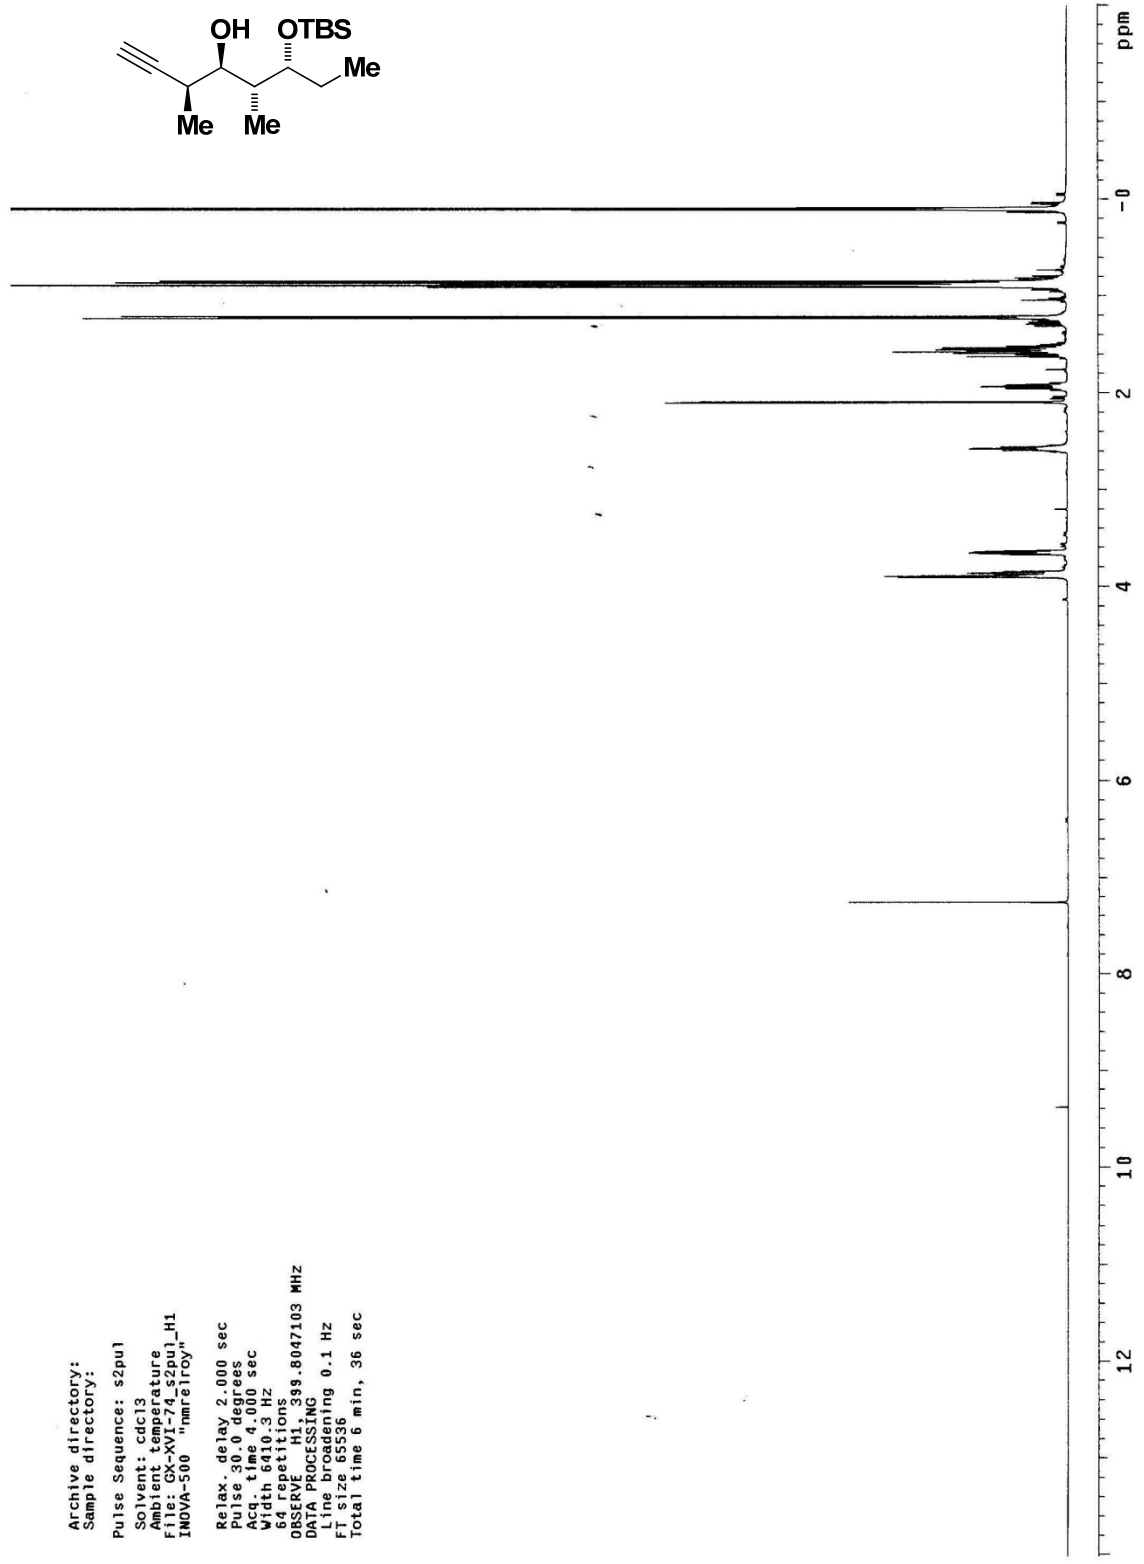

Archive directory:  
Sample directory:  
Pulse Sequence: s2pu1  
Solvent: cdcl3  
Ambient temperature  
User: 1-14-87  
File: GX-XVI-Triple-OH-s2pu1\_C13  
INOVA-500 "nmrelroy"  
Relax. delay 2.000 sec  
Pulse 30.0 degrees  
Acq. time 1.300 sec  
Width 24509.8 Hz  
5000 repetitions  
OBSERVE C13, 100.5309756 MHZ  
DECOUPLE H1, 399.8067105 MHZ  
Power 44 db  
Continuously on  
Waltz-16  
DATA PROCESSING  
Line broadening 2.0 Hz  
FT size 65536  
Total time 4 hr, 35 min, 47 sec

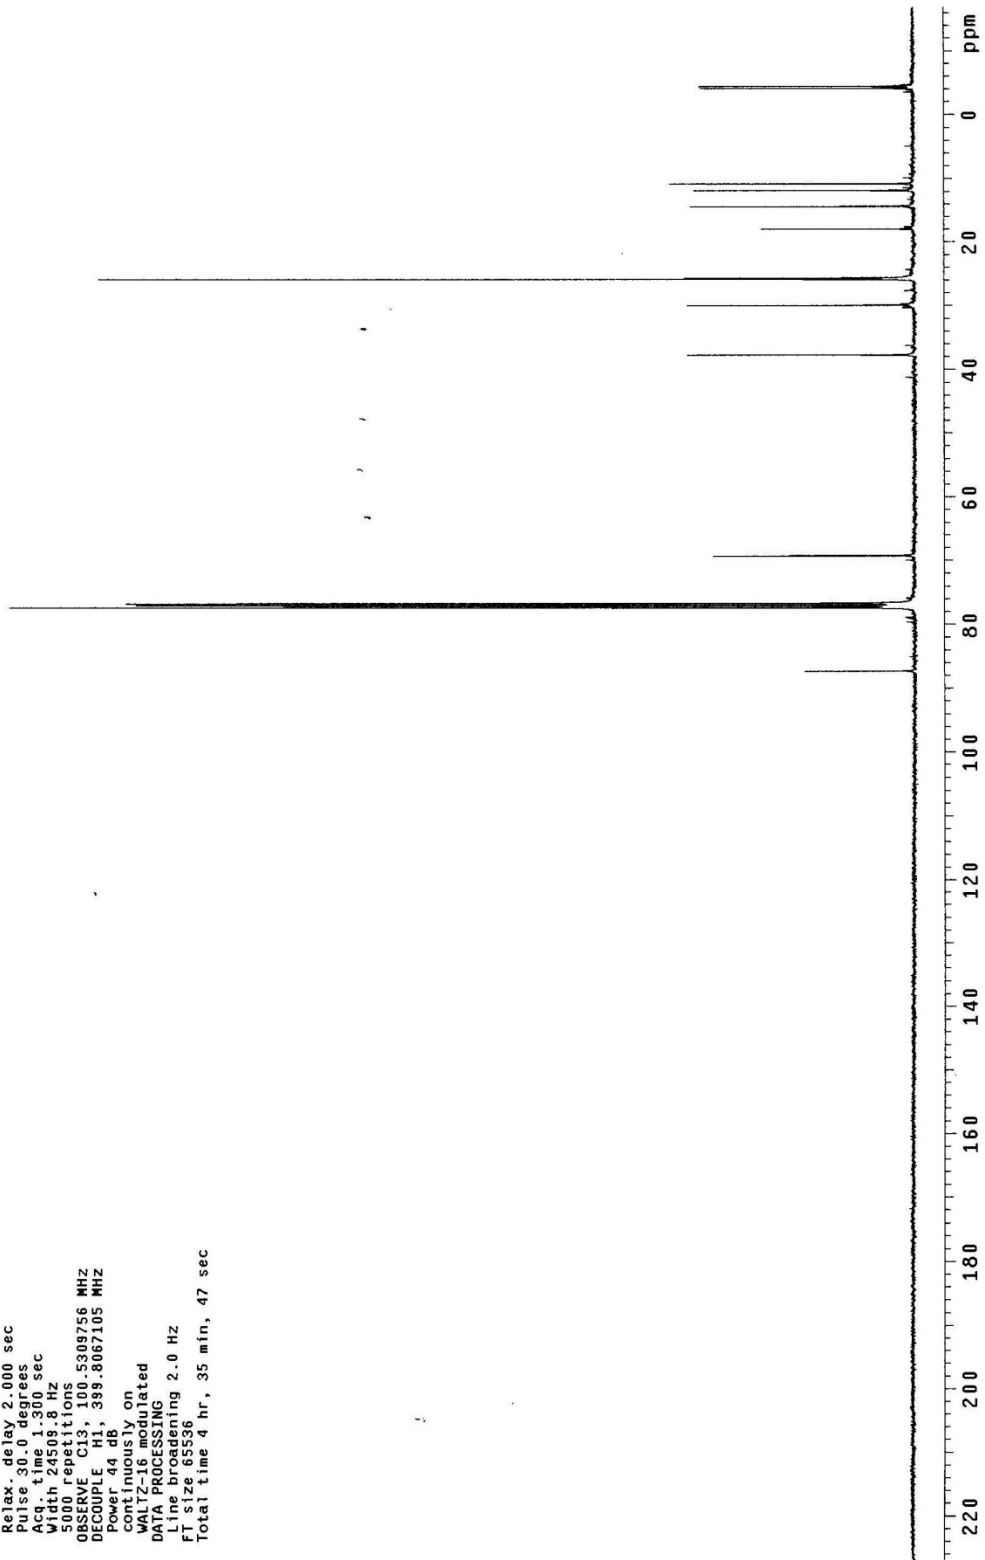

**(3*R*,4*S*,5*R*,6*S*)-5-(benzyloxy)-4,6-dimethyloct-7-yn-3-ol**

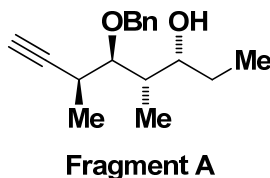

An oven-dried sealed tube under an atmosphere of N<sub>2</sub> was charged with (3*S*,4*R*,5*R*,6*R*)-6-((*tert*-butyldimethylsilyl)oxy)-3,5-dimethyloct-1-yn-4-ol (350 mg, 1.23 mmol, 100 mol%), Ag<sub>2</sub>O (855 mg, 3.69 mmol, 300 mol%) and benzyl bromide (2.104 g, 12.3 mmol, 1000 mol%). The mixture was allowed to stir at 50 °C for 24 hr. Methanol (5 mL) was added to the reaction mixture and the reaction was acidified by conc. HCl (~0.5 mL). After stirring for 30 min under room temperature, pH = 7 buffer (10 mL) was added and the mixture was transferred to a separatory funnel. The aqueous layer was extract with DCM (20 mL × 3). Combined organic layer was dried *in vacuo* and purified by flash column chromatography (SiO<sub>2</sub>; hexanes:ether = 9:1) to furnish the title compound (230.6 mg, 0.886 mmol) as a colorless oil in 72% yield.

**TLC (SiO<sub>2</sub>):** R<sub>f</sub> = 0.48 (ethyl acetate:hexanes, 1:9).

**<sup>1</sup>H NMR**(400 MHz, CDCl<sub>3</sub>): δ 7.35-7.28 (m, 5H), 4.76 (d, *J* = 10.8 Hz, 1H), 4.65 (d, *J* = 10.8 Hz, 1H), 3.96-3.93 (m, 1H), 3.49 (dd, *J* = 8.0, 3.6 Hz, 1H), 3.07 (d, *J* = 1.6 Hz, 1H), 2.87 (dq, *J* = 10.0, 6.8, 2.8 Hz, 1H), 2.13 (d, *J* = 2.8 Hz, 1H), 2.11 (qdd, *J* = 6.8, 4.0, 1.6 Hz, 1H), 1.62-1.51 (m, 1H), 1.43-1.32 (m, 1H), 1.34 (d, *J* = 6.8 Hz, 3H), 1.05 (d, *J* = 7.2 Hz, 3H), 0.93 (t, *J* = 7.6 Hz, 3H).

**<sup>13</sup>C NMR**(100 MHz, CDCl<sub>3</sub>): δ 137.6, 128.5, 128.0, 127.9, 88.2, 86.3, 76.0, 72.1, 70.5, 38.2, 29.4, 27.3, 17.3, 11.4, 10.6.

**[α]<sub>D</sub><sup>25</sup>** = -9.3 (c = 0.22, CH<sub>2</sub>Cl<sub>2</sub>).

**FTIR** (neat): ν 3484, 3302, 2968, 2935, 2876, 1454, 1378, 1347, 1117, 1052, 953, 735, 699.

**HRMS:** (CI) Calcd. for C<sub>17</sub>H<sub>25</sub>O<sub>2</sub> [M+H]<sup>+</sup>: 261.1855, Found: 261.1860.

Archive directory:  
 Sample directory:  
 Pulse Sequence: s2pul1  
 Solvent: cdcl3  
 Ambient temperature  
 File: GX-XVI-Alkyne\_s2pul\_H1  
 INOVA-500 "nmreloy"  
 Relax. delay 2.000 sec  
 Pulse 30.0 degrees  
 Acq. time 4.000 sec  
 Width 6410.3 Hz  
 64 repetitions  
 OBSERVE H1, 399.8047101 MHz  
 DATA PROCESSING  
 Line breaking 0.1 Hz  
 File size 65586  
 Total time 6 min, 36 sec

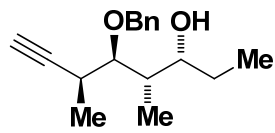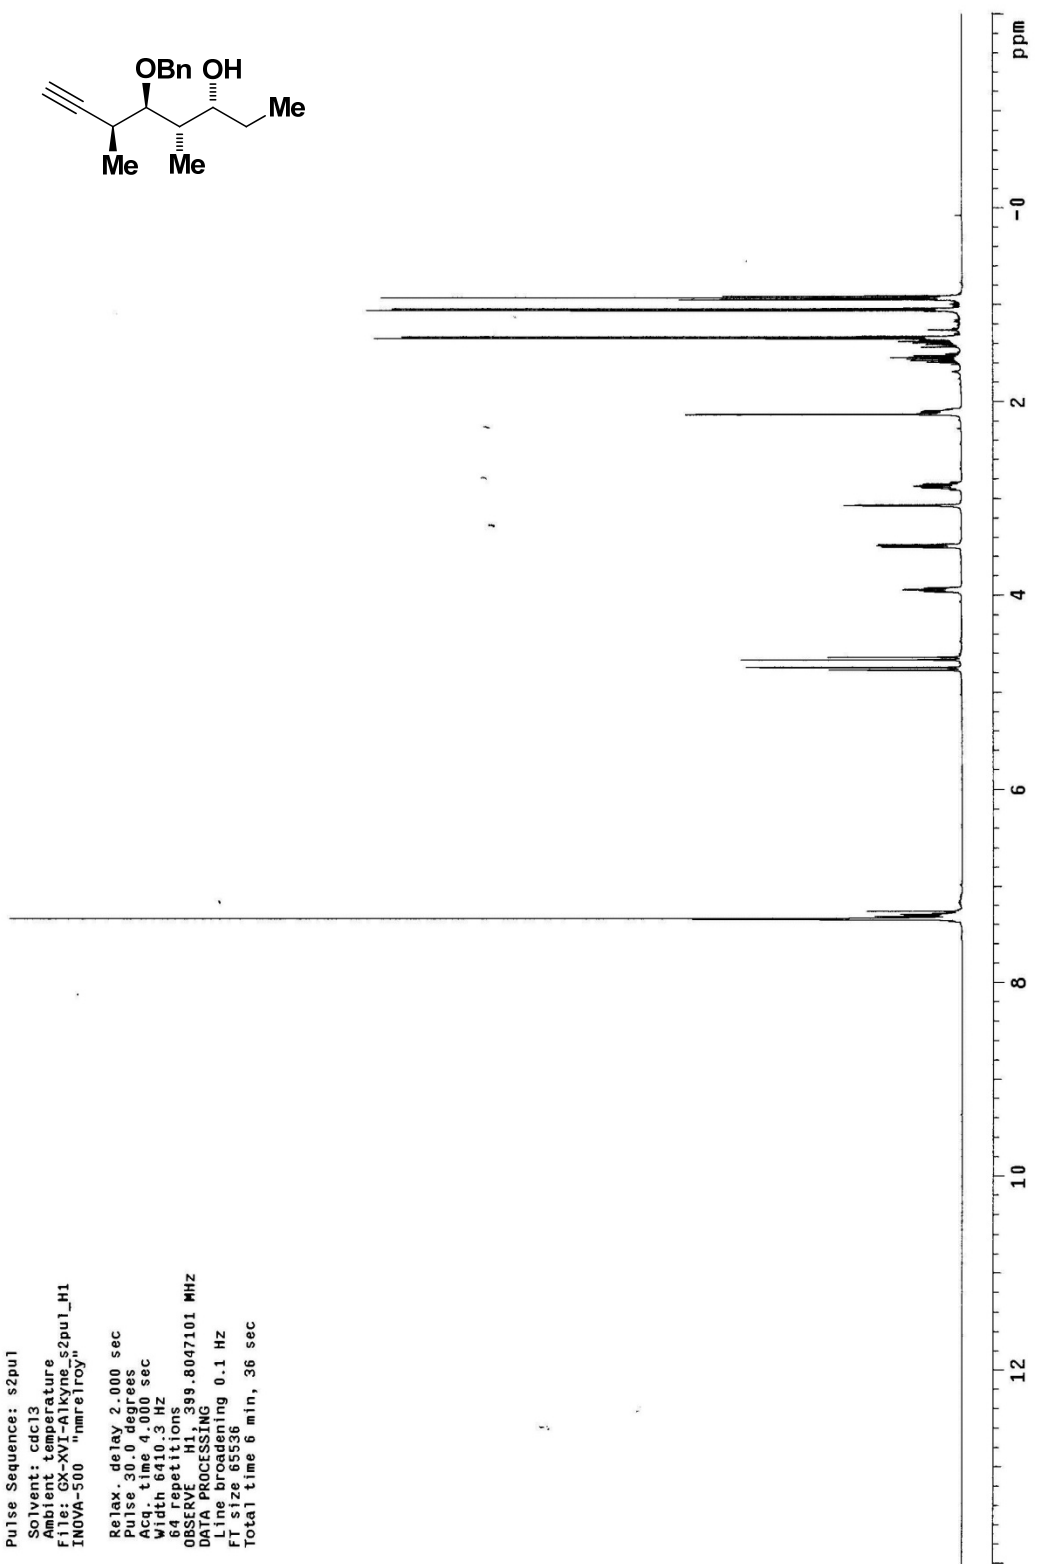

Archive directory:  
Sample directory:  
Pulse Sequence: s2pu1  
Solvent: cdcl3  
Ambient temperature  
User: 1-14-87  
File: GX-XVI-Alkyne\_s2pu1\_C13  
INOVA-500 "nmrelroy"

Relax. delay 2.000 sec  
Pulse 30.0 degrees  
Acq. time 1.300 sec  
Width 24509.8 Hz  
5000 repetitions  
OBSERVE C13, 100.5309779 MHZ  
DECOUPLE H1, 399.6067105 MHZ  
Power 40 dB  
C13 channel on  
WALTZ-16 modulated  
DATA PROCESSING  
Line broadening 2.0 Hz  
FT size 65536  
Total time 4 hr, 35 min, 47 sec

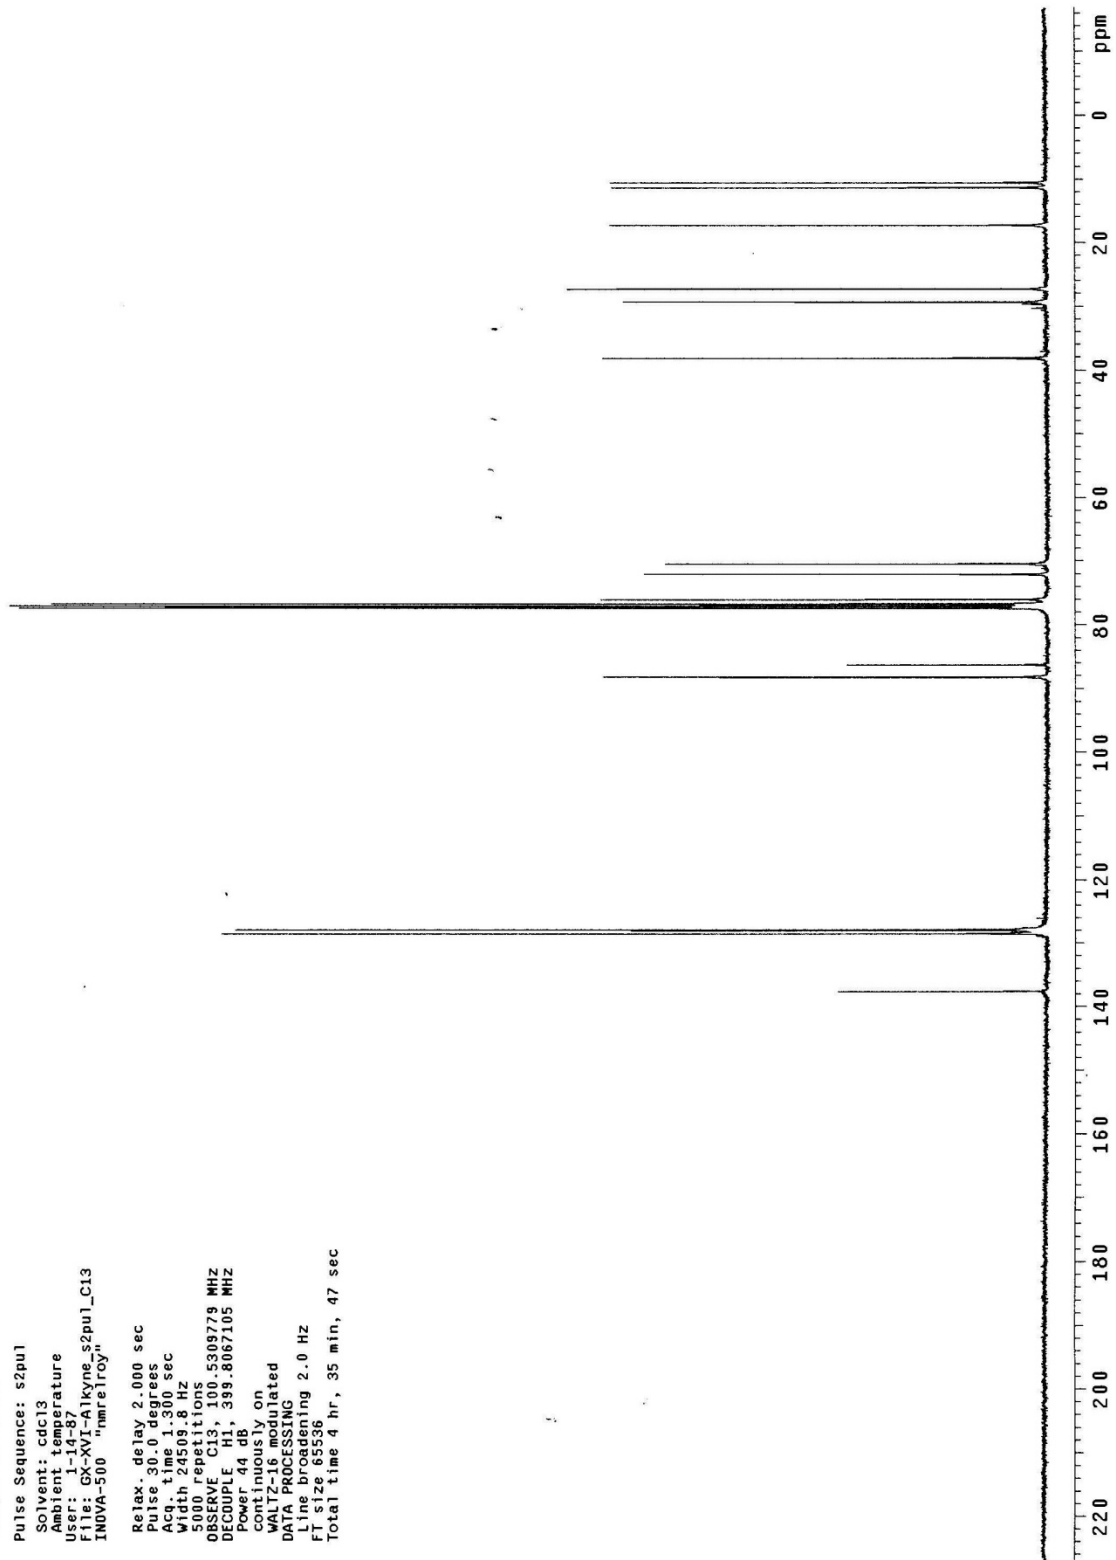



## Procedure and Spectral Data for 6-Deoxyerythronolide B Synthesis

(*R*)-(3*R*,4*S*,5*R*,6*S*)-5-(benzyloxy)-4,6-dimethyloct-7-yn-3-yl

2-((2*S*,4*S*,5*R*,6*S*)-6-((*S*)-but-3-en-2-yl)-2-(4-methoxyphenyl)-5-methyl-1,3-dioxan-4-yl)propanoate

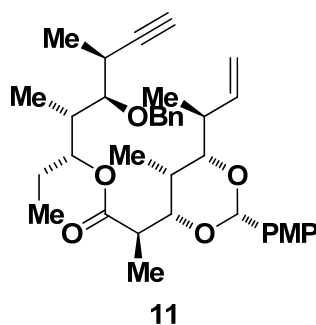

An oven-dried round bottom flask under an atmosphere of N<sub>2</sub> was charged with acid fragment (77.1 mg, 0.23 mmol, 100 mol%), triethylamine (64.3  $\mu$ L, 0.46 mmol, 200 mol%) and THF (2.3 mL, 0.1 M). 2,4,6-Trichlorobenzoyl chloride (72  $\mu$ L, 0.46 mmol, 200 mol%) was added and the mixture was allowed to stir at room temperature for 3 hr. The reaction mixture was filtered through a Celite plug and concentrated *in vacuo*. The residue was dissolved in toluene (1.5 mL) and added to a mixture of alcohol fragment (60.0 mg, 0.23 mmol, 100 mol%), DMAP (112.6 mg, 0.92 mmol, 400 mol%) and toluene (2.3 mL, 0.1 M). The reaction mixture was stirred at room temperature overnight, and loaded on to column directly. Purification by column chromatography (SiO<sub>2</sub>; ethyl acetate: hexanes, 1:20) provides the title compound (90.6 g, 0.16 mmol) as a colorless oil in 70% yield.

**TLC (SiO<sub>2</sub>):** R<sub>f</sub> = 0.59 (ethyl acetate:hexanes, 1:9).

**<sup>1</sup>H NMR** (400 MHz, CDCl<sub>3</sub>):  $\delta$  7.47-7.28 (m, 7H), 6.90-6.88 (m, 2H), 5.96 (ddd, *J* = 17.2, 10.4, 6.8 Hz, 1H), 5.48 (s, 1H), 5.41 (td, *J* = 8.4, 2.4 Hz, 1H), 5.08-5.00 (m, 2H), 4.97 (d, *J* = 10.0, 1H), 4.54 (d, *J* = 10.0, 1H), 3.90 (dd, *J* = 10.4, 2.0 Hz, 1H), 3.80 (s, 3H), 3.50 (dd, *J* = 10.0, 2.0 Hz, 1H), 3.36 (dd, *J* = 10.8, 2.8 Hz, 1H), 2.87-2.75 (m, 2H), 2.41 (qd, *J* = 6.8, 1.6 Hz, 1H), 2.11 (d, *J* = 2.4 Hz, 1H), 1.86-1.80 (m, 2H), 1.74-1.67 (m, 1H), 1.55-1.49 (m, 1H), 1.37 (d, *J* = 6.8 Hz, 3H), 1.24 (d, *J* = 7.2 Hz, 3H), 1.04 (d, *J* = 6.8 Hz, 3H), 0.94 (d, *J* = 7.2 Hz, 3H), 0.89 (d, *J* = 6.8 Hz, 3H), 0.98 (t, *J* = 7.6 Hz, 3H).

**<sup>13</sup>C NMR** (100 MHz, CDCl<sub>3</sub>):  $\delta$  174.2, 159.7, 141.6, 138.4, 131.3, 128.3, 128.3, 127.7, 127.1, 113.9, 113.5, 101.2, 87.8, 84.5, 82.2, 82.1, 74.8, 74.5, 69.8, 55.3, 42.6, 38.9, 38.1, 31.4, 27.6, 25.7, 15.7, 14.4, 14.3, 10.2, 10.2, 6.2.

**$[\alpha]_D^{27}$**  = -14.4 (c = 0.44, CH<sub>2</sub>Cl<sub>2</sub>).

**FTIR** (neat):  $\nu$  3090, 2970, 2972, 2940, 2924, 1740, 1454, 1377, 1350, 1121, 1052, 765, 730, 668.

**HRMS**: (CI) Calcd. for  $C_{36}H_{47}O_6$   $[M-H]^+$ : 575.3374, Found: 575.3377.

Archive directory:  
Sample directory:

Pulse Sequence: s2pul  
Solvent: cdcl3  
Ambient temperature  
File: CX-XV-82\_S2pul\_H1  
INOVA-500 "nmrelroy"

Relax. delay 2.000 sec  
Pulse 30.0 degrees  
Acq. time 4.000 sec  
Width 6410.3 Hz  
64 repetitions  
OBSERVE H1, 399.8047113 MHz  
DATA PROCESSING  
Line broadening 0.1 Hz  
FT size 65536  
Total time 6 min, 36 sec

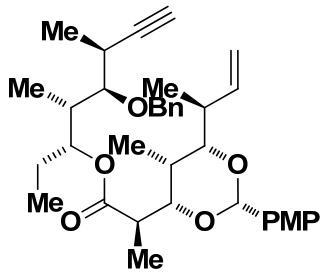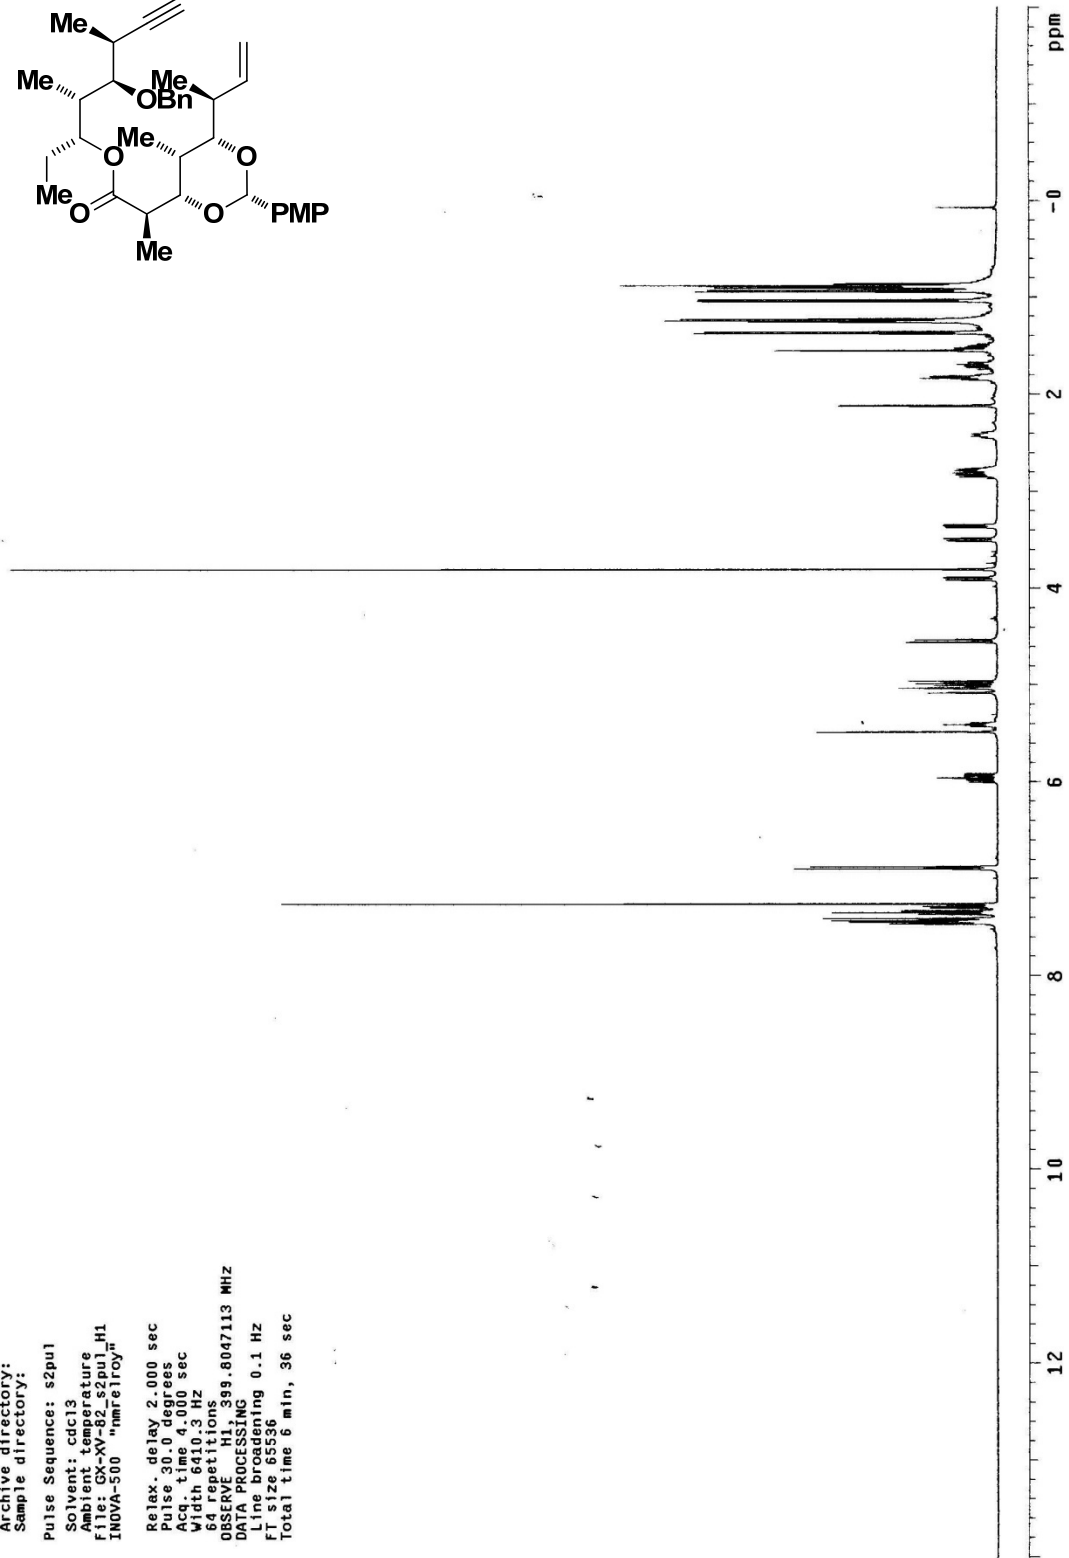

Archive directory:  
Sample directory:

Pulse Sequence: s2pul  
Solvent: cdcl3  
Ambient temperature  
User: 1-14-87  
File: GX-XVI-19\_s2pul\_C13  
INOVA-500 "nmrelroy"

Relax. delay 2.000 sec  
Pulse 30.0 degrees  
Acq. time 1.300 sec  
Width 24509.8 Hz  
5000 repetitions  
OBSERVE C13, 100.5309771 MHZ  
DECOUPLE H1, 399.8067105 MHZ  
Power 44 dB  
continuously on  
WALTZ-16 modulated  
DATA PROCESSING  
Line broadening 2.0 Hz  
FT size 65536  
Total time 4 hr, 35 min, 47 sec

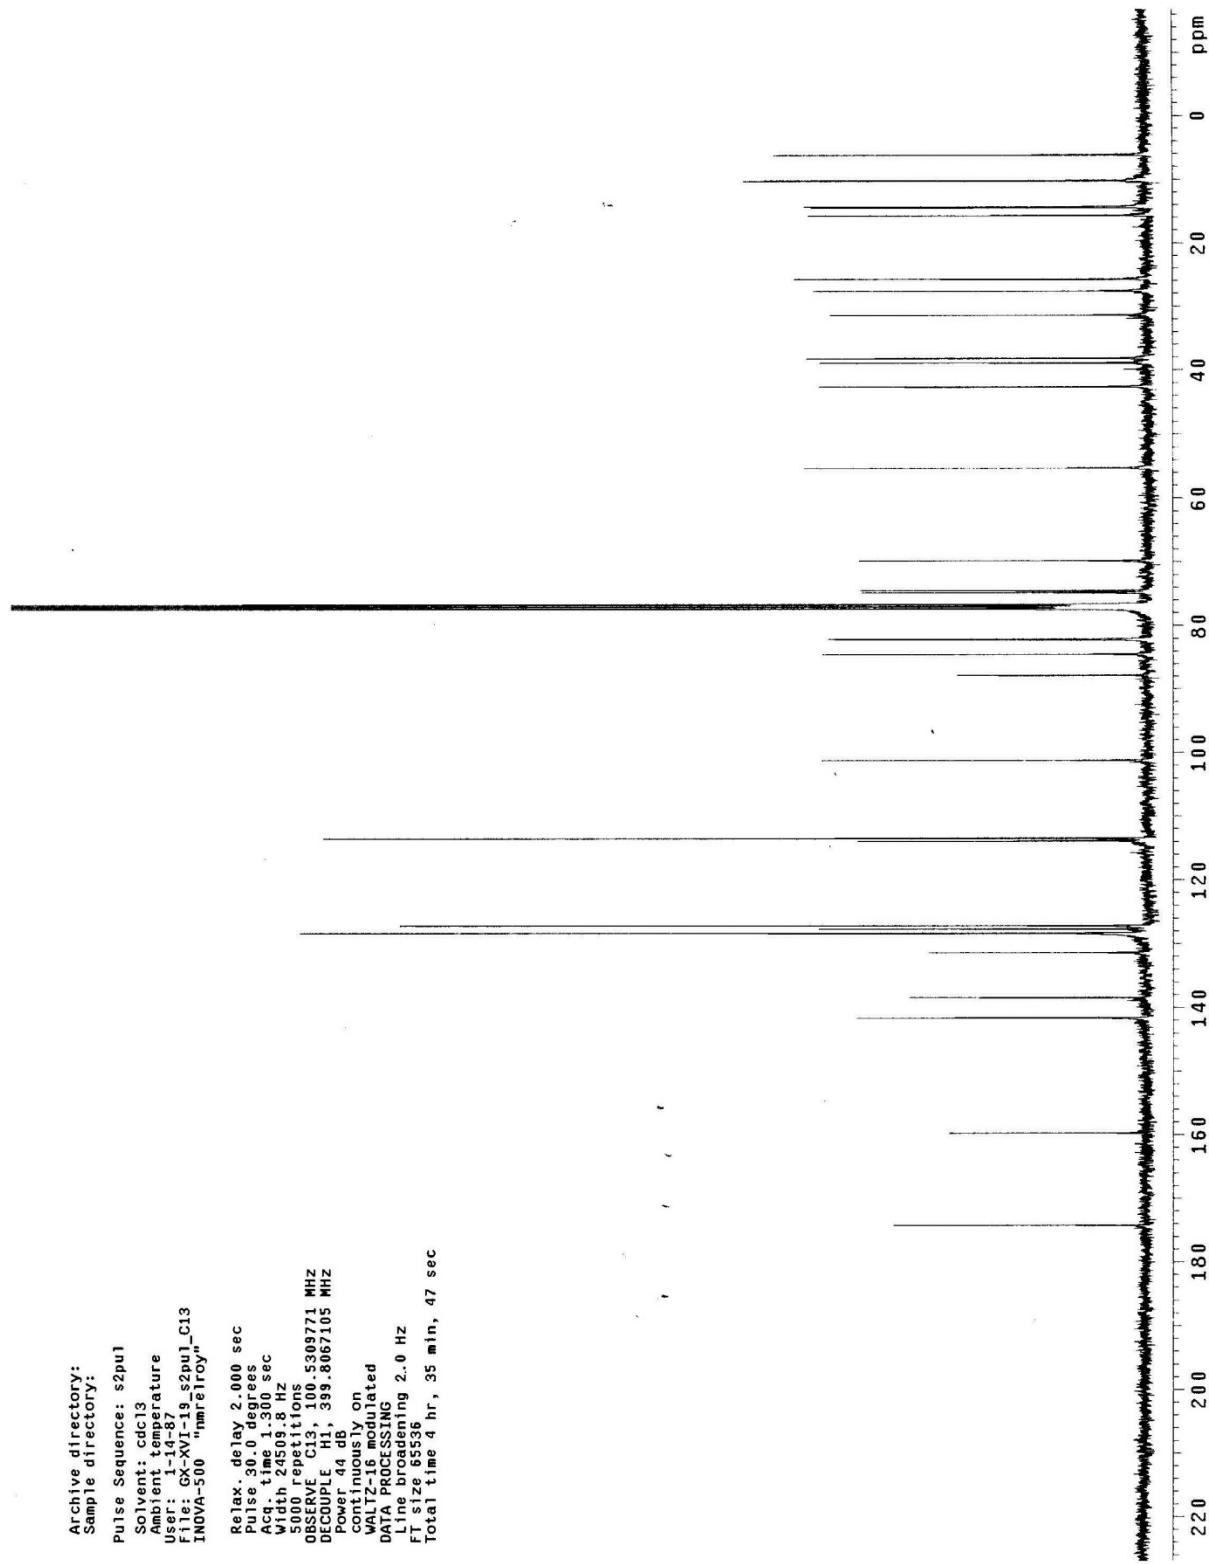

**(1*S*,2*R*,5*R*,6*S*,7*R*,8*S*,12*S*,13*S*,15*S*,17*R*,*E*)-7-(benzyloxy)-5-ethyl-15-(4-methoxyphenyl)-2,6,8,12,17-pentamethyl-9-methylene-4,14,16-trioxabicyclo[11.3.1]heptadec-10-en-3-one**

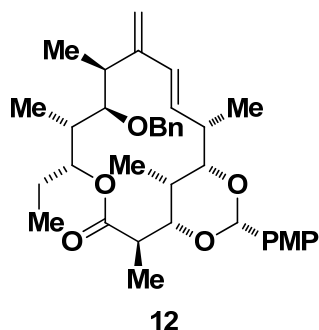

An oven-dried round bottom flask under an atmosphere of ethylene (balloon pressure) was charged with (*R*)-(3*R*,4*S*,5*R*,6*S*)-5-(benzyloxy)-4,6-dimethyloct-7-yn-3-yl-2-((2*S*,4*S*,5*R*,6*S*)-6-((*S*)-but-3-en-2-yl)-2-(4-methoxyphenyl)-5-methyl-1,3-dioxan-4-yl)propanoate (105.2 mg, 0.18 mmol, 100 mol%), Hoveyda-Grubbs 2<sup>nd</sup> generation catalyst (34.3 mg, 0.60 mmol, 30 mol%) and toluene (182.4 mL, 0.001 M). The mixture was allowed to stir at 80 °C overnight. Blowing nitrogen through the reaction system to remove the ethylene and the reaction mixture was allowed to stir at 110 °C for another 24 hr followed by loading on to column directly. Purification by column chromatography (SiO<sub>2</sub>; ethyl acetate: hexanes, 1:20) provides the title compound (93.6 mg, 0.16 mmol) as a colorless viscous oil in 89% yield.

**TLC (SiO<sub>2</sub>):** R<sub>f</sub> = 0.62 (ethyl acetate:hexanes, 1:9).

**<sup>1</sup>H NMR**(400 MHz, CDCl<sub>3</sub>): δ 7.49-7.46 (m, 2H), 7.39-7.27 (m, 5H), 6.94-6.90 (m, 2H), 6.22 (d, *J* = 16.0 Hz, 1H), 5.65 (dd, *J* = 16.0, 9.6 Hz, 1H), 5.60 (s, 1H), 5.47 (dd, *J* = 8.4, 5.6 Hz, 1H), 5.23 (s, 1H), 5.16 (s, 1H), 4.46 (d, *J* = 9.2 Hz, 1H), 4.33 (d, *J* = 9.2 Hz, 1H), 3.83-3.80 (m, 1H), 3.82 (s, 3H), 3.65 (dd, *J* = 11.2, 1.2 Hz, 1H), 3.49 (d, *J* = 10.0 Hz, 1H), 2.96-2.80 (m, 3H), 2.17 (q, *J* = 6.8 Hz, 1H), 1.81-1.66 (m, 1H), 1.54-1.45 (m, 1H), 1.26 (d, *J* = 6.4 Hz, 3H), 1.24 (d, *J* = 6.4 Hz, 3H), 1.23 (d, *J* = 7.2 Hz, 3H), 1.14 (d, *J* = 6.8 Hz, 3H), 1.01 (d, *J* = 7.2 Hz, 3H), 0.86 (t, *J* = 7.6 Hz, 3H).

**<sup>13</sup>C NMR** (100 MHz, CDCl<sub>3</sub>): δ 174.7, 160.0, 148.7, 138.7, 132.8, 132.7, 131.2, 128.4, 128.3, 127.6, 127.5, 115.7, 113.6, 102.6, 84.5, 83.7, 80.0, 76.0, 75.1, 55.3, 41.6, 40.2, 40.1, 35.5, 33.4, 26.5, 14.1, 13.0, 10.6, 9.9, 9.9, 9.4.

**[α]<sub>D</sub><sup>27</sup>** = -19.9 (c = 0.58, CH<sub>2</sub>Cl<sub>2</sub>).

**FTIR** (neat): ν 2972, 2936, 2880, 1723, 1616, 1518, 1458, 1385, 1302, 1249, 1174, 1153, 1096, 1071, 1030, 1005, 891, 829, 755, 733, 699.

**HRMS**: (CI) Calcd. for C<sub>36</sub>H<sub>48</sub>O<sub>6</sub> [M]<sup>+</sup>: 576.3452, Found: 576.3442.

Archive directory:  
Sample directory:

Pulse Sequence: s2pul  
Solvent: cdcl3  
Ambient temperature  
File: GX-XV-95\_s2pul\_H1  
INOVA-500 "nmr1roy"

Relax. delay 2.000 sec  
Pulse 30.0 degrees  
Acq. time 4.000 sec  
Width 6410.3 Hz  
64 repetitions

OBSERVE H1, 399.8047113 MHZ  
DATA PROCESSING  
Line broadening 0.1 Hz  
FT size 65536  
Total time 6 min, 36 sec

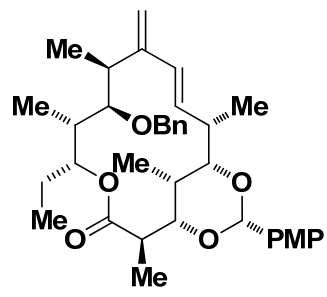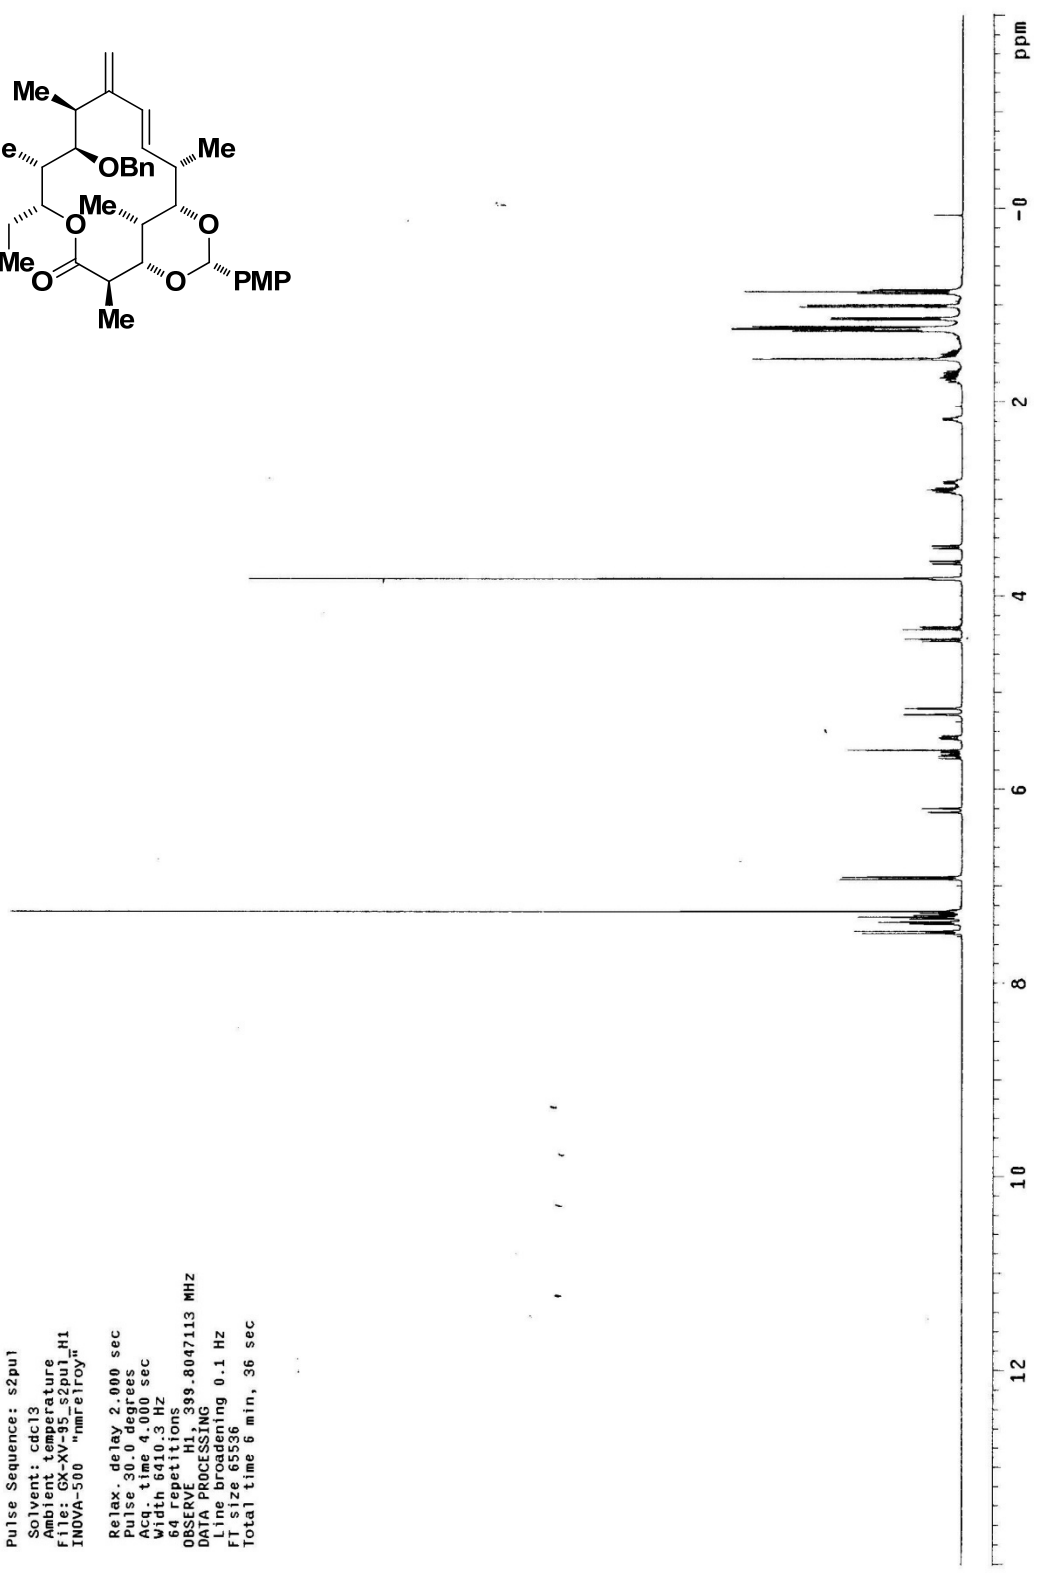

Archive directory:  
Sample directory:

Pulse Sequence: s2pul  
Solvent: cdcl3  
Ambient temperature  
User: 1-14-87  
File: GX-XV-95\_s2pul\_C13  
INOVA-500 "nmFeIroy"

Relax. delay 2.000 sec  
Pulse 30.0 degrees  
Acq. time 1.380 sec  
Width 24509.8 Hz  
5000 repetitions  
OBSERVE C13, 100.5309749 MHZ  
DECOUPLE H1, 399.8067105 MHZ  
Power 44 dB  
Continuously on  
WALTZ-16 modulated  
DATA PROCESSING  
Line broadening 2.0 Hz  
FT size 65536  
Total time 4 hr, 35 min, 47 sec

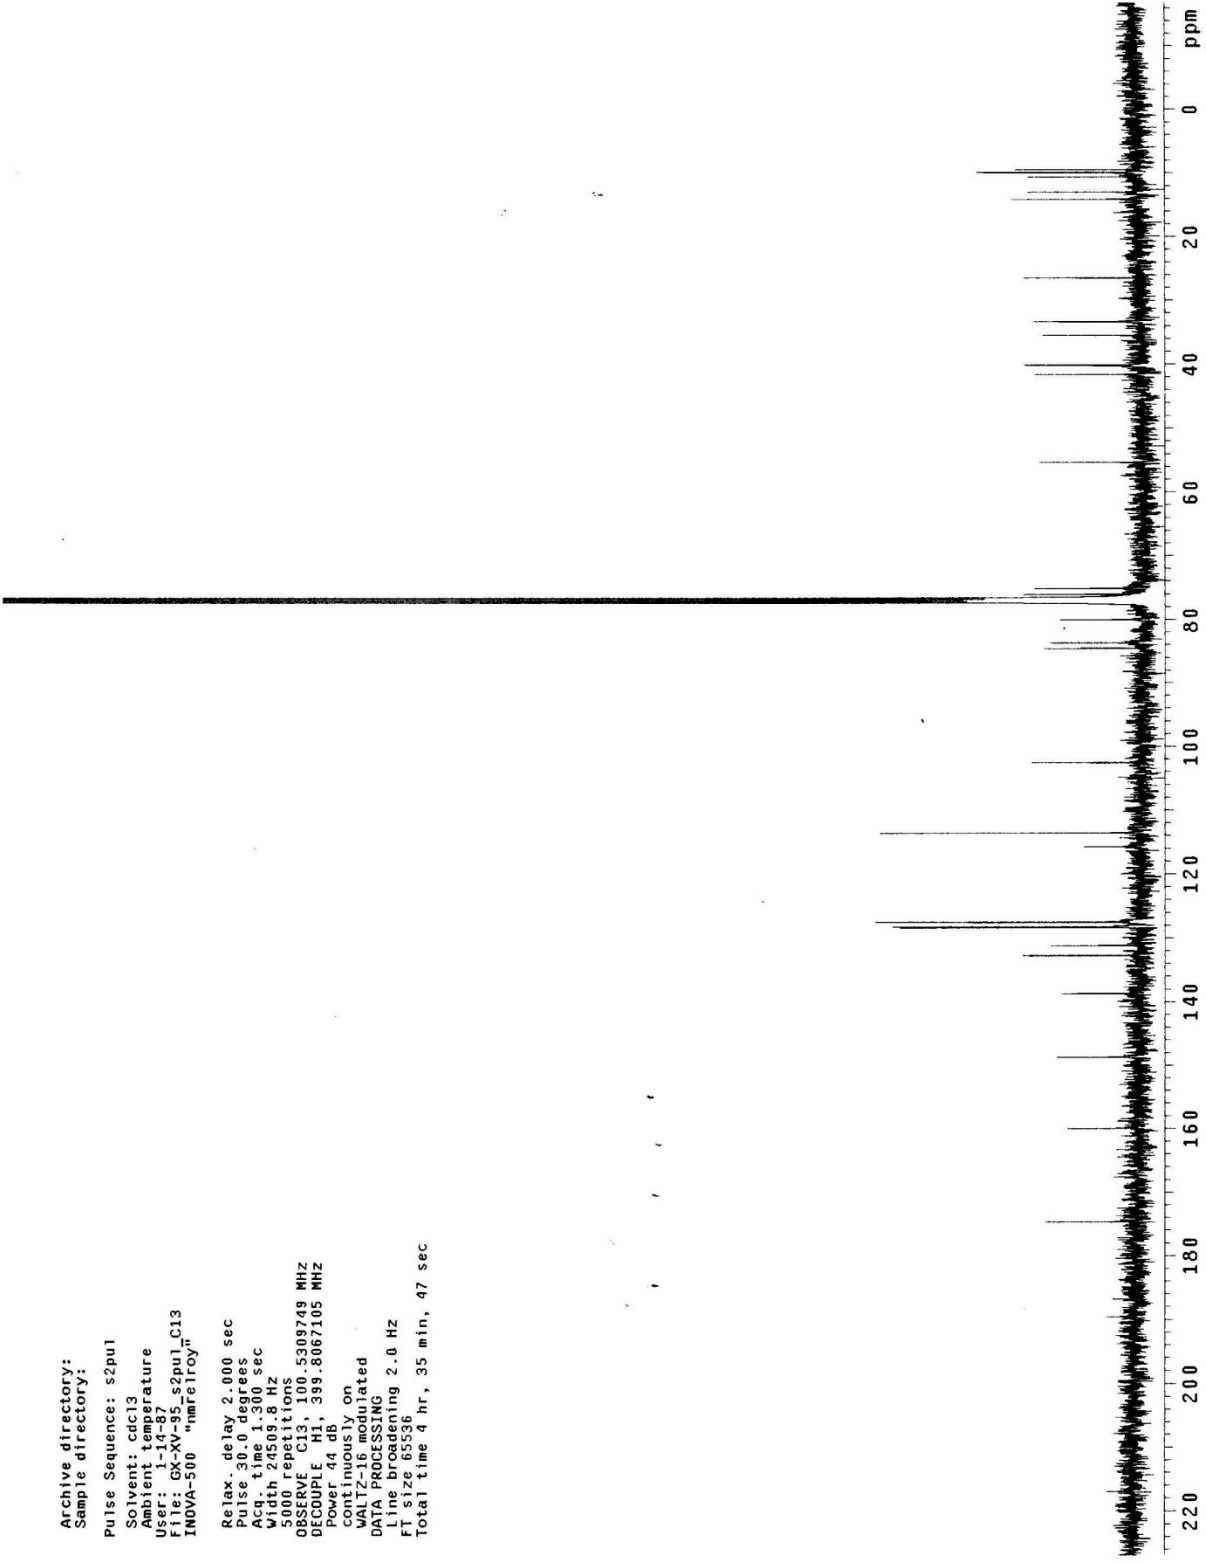



**(1*S*,2*R*,5*R*,6*S*,7*S*,8*R*,12*S*,13*S*,15*S*,17*R*,*E*)-7-(benzyloxy)-5-ethyl-15-(4-methoxyphenyl)-2,6,8,12,17-pentamethyl-4,14,16-trioxabicyclo[11.3.1]heptadec-10-ene-3,9-dione**

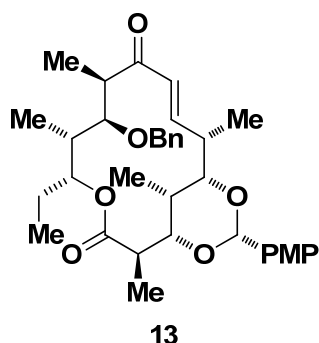

An oven-dried round bottom flask under an atmosphere of N<sub>2</sub> was charged with (1*S*,2*R*,5*R*,6*S*,7*R*,8*S*,12*S*,13*S*,15*S*,17*R*,*E*)-7-(benzyloxy)-5-ethyl-15-(4-methoxyphenyl)-2,6,8,12,17-pentamethyl-9-methylene-4,14,16-trioxabicyclo[11.3.1]heptadec-10-en-3-one (33.0 mg, 0.0607 mmol, 100 mol%) and THF:H<sub>2</sub>O (3.0 mL, 1:1, 0.02 M). OsO<sub>4</sub> in *t*-butanol (0.303 mL, 0.02M, 0.00607 mmol, 10 mol%) was added under 0 °C and NMO (27.1 g, 0.200 mmol, 300 mol%) was added in one portion. The reaction mixture was stirred overnight, and solid NaIO<sub>4</sub> (66.5 mg, 0.243 mmol, 400 mol%) was added in one portion. Stirring was continued for another 12 hr followed by saturated aqueous Na<sub>2</sub>S<sub>2</sub>O<sub>3</sub> (8 mL) was added. The reaction mixture was stirred vigorously for 15 min and then transferred to a separatory funnel. The aqueous phase was extracted with ethyl acetate (3 × 30 mL). The combined organic extracts were dried (MgSO<sub>4</sub>), filtered and concentrated under reduced pressure. The residue was purified by flash column chromatography (SiO<sub>2</sub>: ethyl acetate:hexanes, 1:20) to give the title compound (19.3 mg, 0.0334 mmol) as a colorless oil in 55% yield.

**TLC (SiO<sub>2</sub>):** R<sub>f</sub> = 0.33 (ethyl acetate:hexanes, 1:9).

**<sup>1</sup>H NMR** (400 MHz, CDCl<sub>3</sub>): δ 7.48-7.45 (m, 2H), 7.41-7.28 (m, 5H), 6.93-6.91 (m, 2H), 6.59 (dd, *J* = 16.4, 9.6 Hz, 1H), 6.10 (dd, *J* = 16.4 Hz, 1H), 5.61 (s, 1H), 5.51 (dd, *J* = 8.8, 5.6 Hz, 1H), 4.26-4.20 (m, 2H), 3.87 (dd, *J* = 7.6, 1.2 Hz, 1H), 3.82 (s, 3H), 3.75 (d, *J* = 10.0 Hz, 1H), 3.66 (d, *J* = 10.0 Hz, 1H), 3.27 (q, *J* = 6.4 Hz, 1H), 3.08-2.99 (m, 1H), 2.95-2.87 (m, 1H), 2.07-2.02 (m, 1H), 1.85-1.68 (m, 2H), 1.63-1.45 (m, 1H), 1.30 (d, *J* = 6.8 Hz, 3H), 1.28 (d, *J* = 7.2 Hz, 3H), 1.26 (d, *J* = 6.8 Hz, 3H), 1.14 (d, *J* = 6.8 Hz, 3H), 1.05 (d, *J* = 7.2 Hz, 3H), 0.87 (t, *J* = 7.6 Hz, 3H).

**<sup>13</sup>C NMR** (100 MHz, CDCl<sub>3</sub>): δ 204.4, 174.5, 160.0, 147.4, 137.5, 131.6, 130.8, 128.8, 128.4, 127.9, 127.5, 113.6, 102.7, 84.2, 82.4, 80.9, 75.7, 73.7, 55.3, 43.8, 41.6, 40.2, 40.0, 33.6, 26.4, 13.5, 13.1, 10.5, 10.1, 9.5, 6.7.

**[α]<sub>D</sub><sup>27</sup>** = -33.7 (c = 0.21, CH<sub>2</sub>Cl<sub>2</sub>).

**FTIR** (neat): ν 3477, 2930, 1734, 1628, 1455, 1377, 1247, 1188, 1099, 1022, 808, 630.

**HRMS**: (CI) Calcd. for C<sub>35</sub>H<sub>47</sub>O<sub>7</sub> [M+H]<sup>+</sup>: 579.3323, Found: 579.3330.

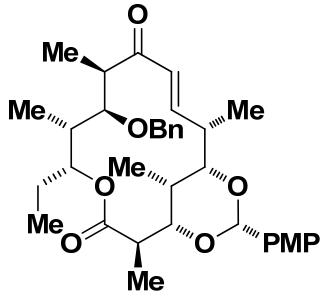

Archive directory:  
Sample directory:

Pulse Sequence: s2pul  
Solvent: cdcl3  
Ambient temperature  
File: GX-XVI-2.s2pul\_H1  
INOVA-500 <sup>1</sup>Hnmf1royπ

Relax. delay 2.000 sec  
Pulse 30.0 degrees  
Acq. time 4.080 sec  
Width 6410.3 Hz  
64 repetitions

OBSERVE H1, 399.8047111 MHZ  
DATA PROCESSING  
Line broadening 0.1 Hz  
FT size 65536  
Total time 6 min, 36 sec

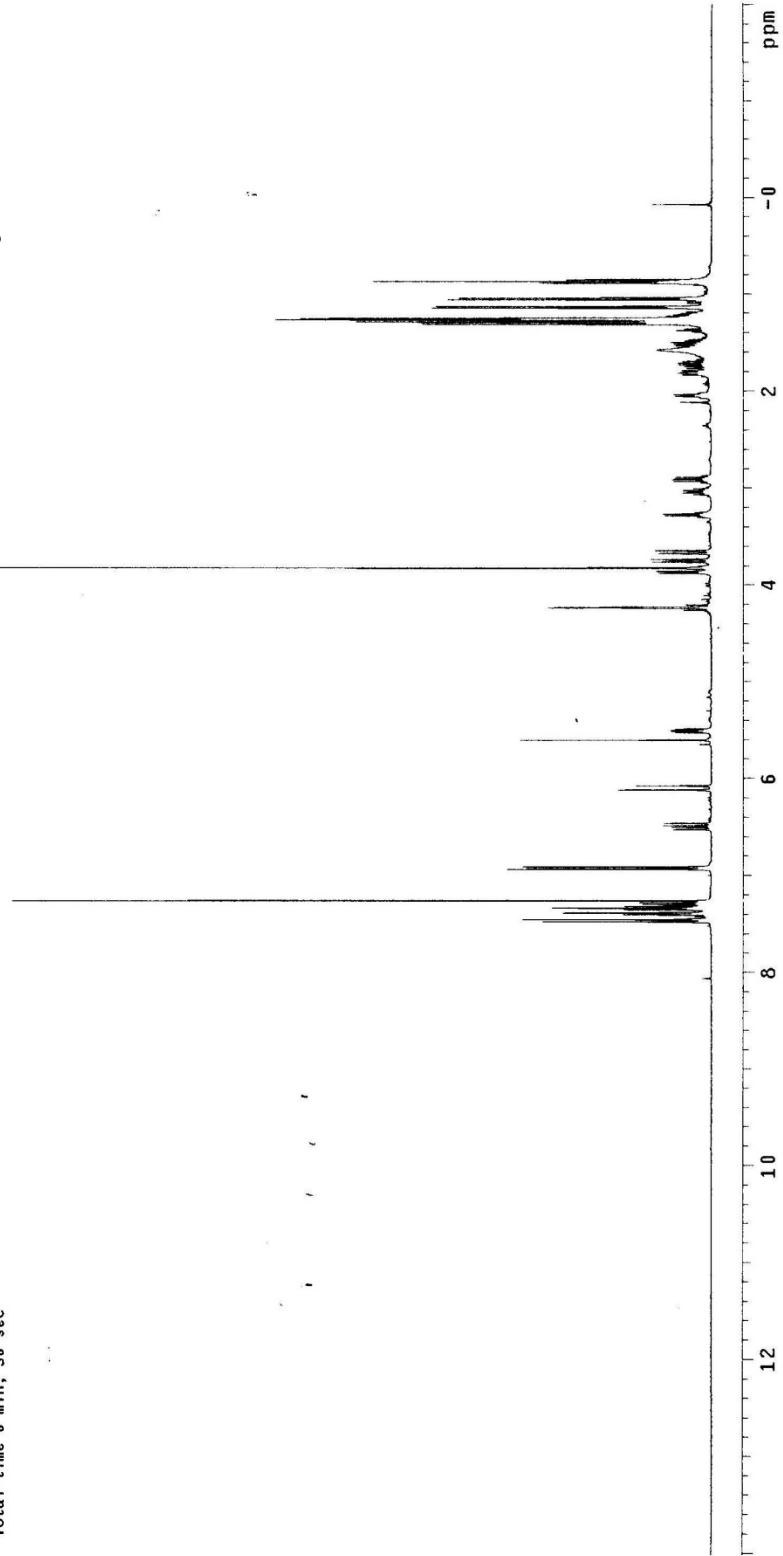

Archive directory:  
Sample directory:  
Pulse Sequence: s2pul  
Solvent: cdcl3  
Acqnt: temperature  
User: 1-14-87  
File: GX-XVI-2\_s2pul\_C13  
INOVA-500 "nmre1roy"

Relax. delay 2.000 sec  
Pulse, 30.0 degrees  
Acq time 1.300 sec  
Width 24509.8 Hz  
5000 repetitions  
OBSERVE C13, 100.5309756 MHz  
DECOUPLE H1, 399.8067105 MHz  
Power 44 dB  
continuously on  
WALTZ-16 modulated  
DATA PROCESSING  
Line broadening 2.0 Hz  
FT size 65536  
Total time 4 hr, 35 min, 47 sec

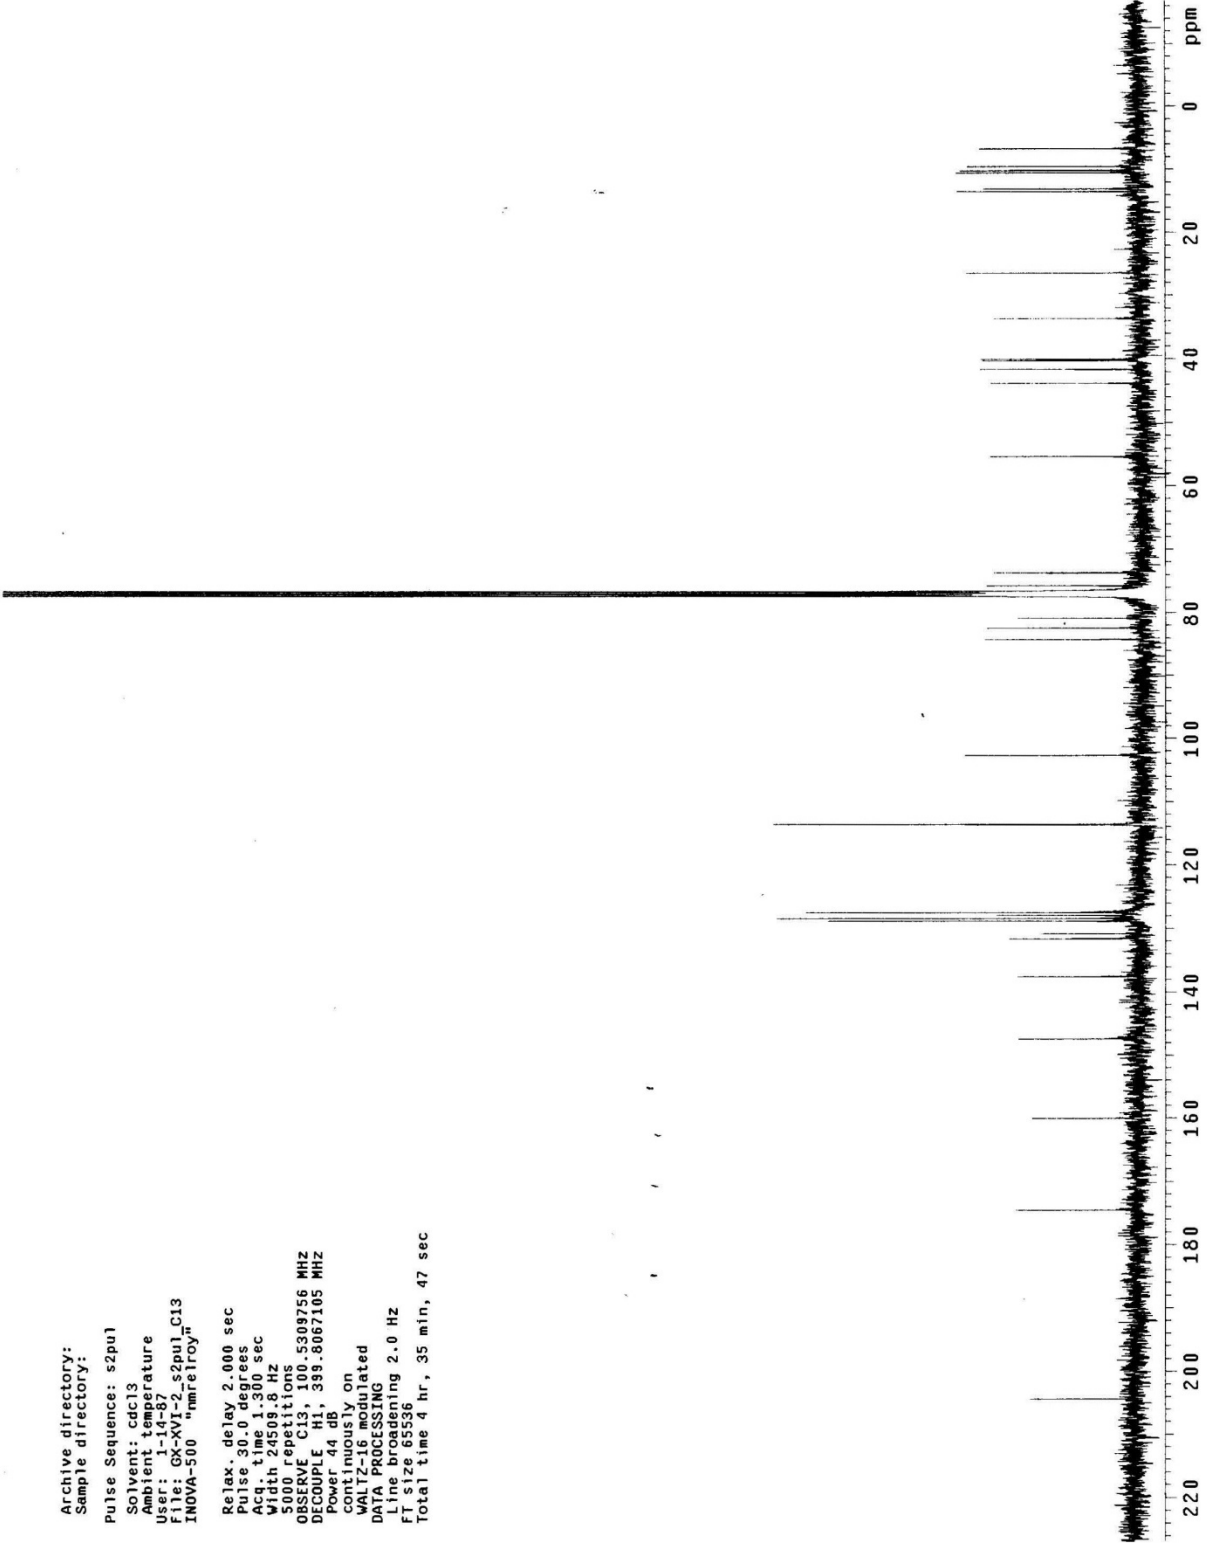

**(1*S*,2*R*,5*R*,6*S*,7*S*,8*R*,12*S*,13*S*,15*S*,17*R*)-7-(benzyloxy)-5-ethyl-15-(4-methoxyphenyl)-2,6,8,12,17-pentamethyl-4,14,16-trioxabicyclo[11.3.1]heptadecane-3,9-dione**

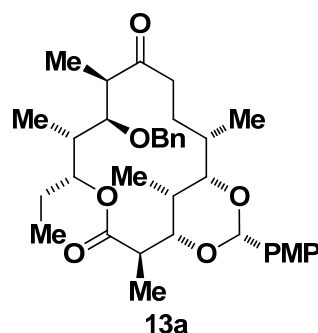

A solution of (1*S*,2*R*,5*R*,6*S*,7*S*,8*R*,12*S*,13*S*,15*S*,17*R*,*E*)-7-(benzyloxy)-5-ethyl-15-(4-methoxyphenyl)-2,6,8,12,17-pentamethyl-4,14,16-trioxabicyclo[11.3.1]heptadec-10-ene-3,9-dione (12.3 mg, 0.0213 mmol, 100 mol%) in THF:MeOH (0.9 mL, 1:1, 0.025 M) was cooled to 0 °C. To this solution was added NiCl<sub>2</sub> hexahydrate (2.5 mg, 0.0106 mmol, 50 mol%) in one portion. The reaction was stirred at 0 °C for 10 min, and NaBH<sub>4</sub> (1.6 mg, 0.0425 mmol, 200 mol%) was added in three portions. The reaction mixture was stirred for another 1 hr. Purification by column chromatography (SiO<sub>2</sub>; ethyl acetate: hexanes, 1:20) gave the title compound (11.1 mg, 0.0191 mmol) as a colorless oil in 90% yield, > 10:1 regioselectivity.

**TLC (SiO<sub>2</sub>):** R<sub>f</sub> = 0.31 (ethyl acetate:hexanes, 1:9).

**<sup>1</sup>H NMR** (400 MHz, CDCl<sub>3</sub>): δ 7.47-7.45 (m, 2H), 7.41-7.28 (m, 5H), 6.93-6.90 (m, 2H), 5.64-5.61 (m, 2H), 4.34 (d, *J* = 9.2 Hz, 1H), 4.23 (d, *J* = 9.2 Hz, 1H), 3.97 (d, *J* = 6.4 Hz, 1H), 3.82 (s, 3H), 3.81-3.78 (m, 2H), 3.00-2.92 (m, 1H), 2.90-2.80 (m, 2H), 2.41-2.33 (m, 1H), 2.26-2.19 (m, 1H), 2.01 (q, *J* = 6.8 Hz, 1H), 1.87-1.69 (m, 2H), 1.56-1.46 (m, 1H), 1.29 (d, *J* = 6.8 Hz, 3H), 1.27 (d, *J* = 7.2 Hz, 3H), 1.11 (d, *J* = 7.2 Hz, 3H), 1.07 (d, *J* = 6.8 Hz, 3H), 1.02 (d, *J* = 7.2 Hz, 3H), 0.89 (t, *J* = 7.2 Hz, 3H).

**<sup>13</sup>C NMR** (100 MHz, CDCl<sub>3</sub>): δ 213.4, 175.2, 160.0, 137.5, 131.0, 128.6, 128.4, 127.9, 127.5, 113.6, 102.7, 84.3, 80.9, 80.2, 75.9, 72.8, 55.3, 44.9, 41.6, 40.8, 39.5, 35.0, 32.5, 30.3, 26.2, 15.8, 13.4, 10.5, 10.1, 9.2, 6.5.

**[α]<sub>D</sub><sup>27</sup>** = -39.0 (c = 0.16, CH<sub>2</sub>Cl<sub>2</sub>).

**FTIR** (neat): ν 2972, 2940, 2923, 1730, 1717, 1366, 1214, 1099, 765, 729, 663.

**HRMS**: (CI) Calcd. for C<sub>35</sub>H<sub>48</sub>O<sub>7</sub> [M]<sup>+</sup>: 580.3401, Found: 580.3400.

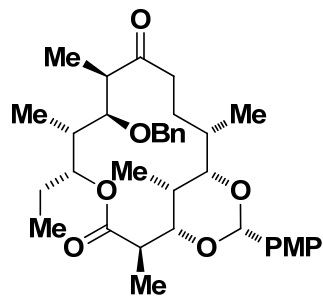

Archive directory:  
 Sample directory:  
 Pulse Sequence: s2pu1  
 Solvent: cdcl3  
 Ambient temperature  
 File: GX-XVI-Ketone\_s2pu1\_H1  
 INOVA-500 "nmrelroy"  
 Relax. delay 2.000 sec  
 Pulse 30.0 degrees  
 Acq. time 4.000 sec  
 Width 6410.3 Hz  
 64 repetitions  
 OBSERVE H1, 399.8047111 MHZ  
 DATA PROCESSING  
 Line broadening 0.1 Hz  
 FT size 65536  
 Total time 6 min, 36 sec

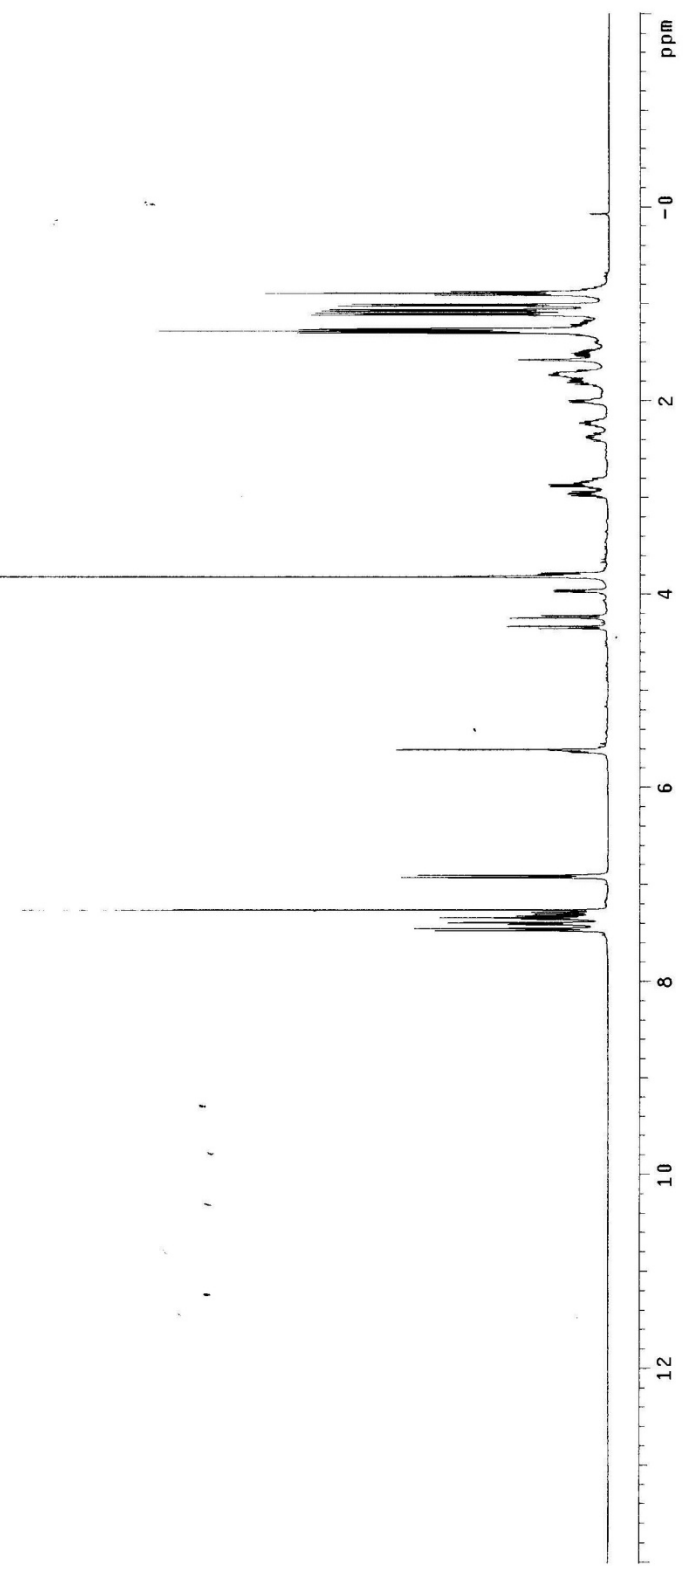

Archive directory:  
Sample directory:  
Pulse Sequence: s2pul  
Solvent: cdcl3  
Ambient temperature  
User: 1-14-87  
File: GX-XVI-Ketone\_s2pul\_C13  
INOVA-500 "nmrelroy"

Relax. delay 2.000 sec  
Pulse 30.0 degrees  
Acq. time 1.300 sec  
Width 24509.8 Hz  
2000 repetitions  
OBSERVE C13, 100.5309764 MHZ  
DECOUPLE H1, 399.8067105 MHZ  
Power 44 dB  
continuously on  
WALTZ-16 modulated  
DATA PROCESSING  
Line broadening 2.0 Hz  
F1 size 65536  
Total time 1 hr, 50 min, 18 sec

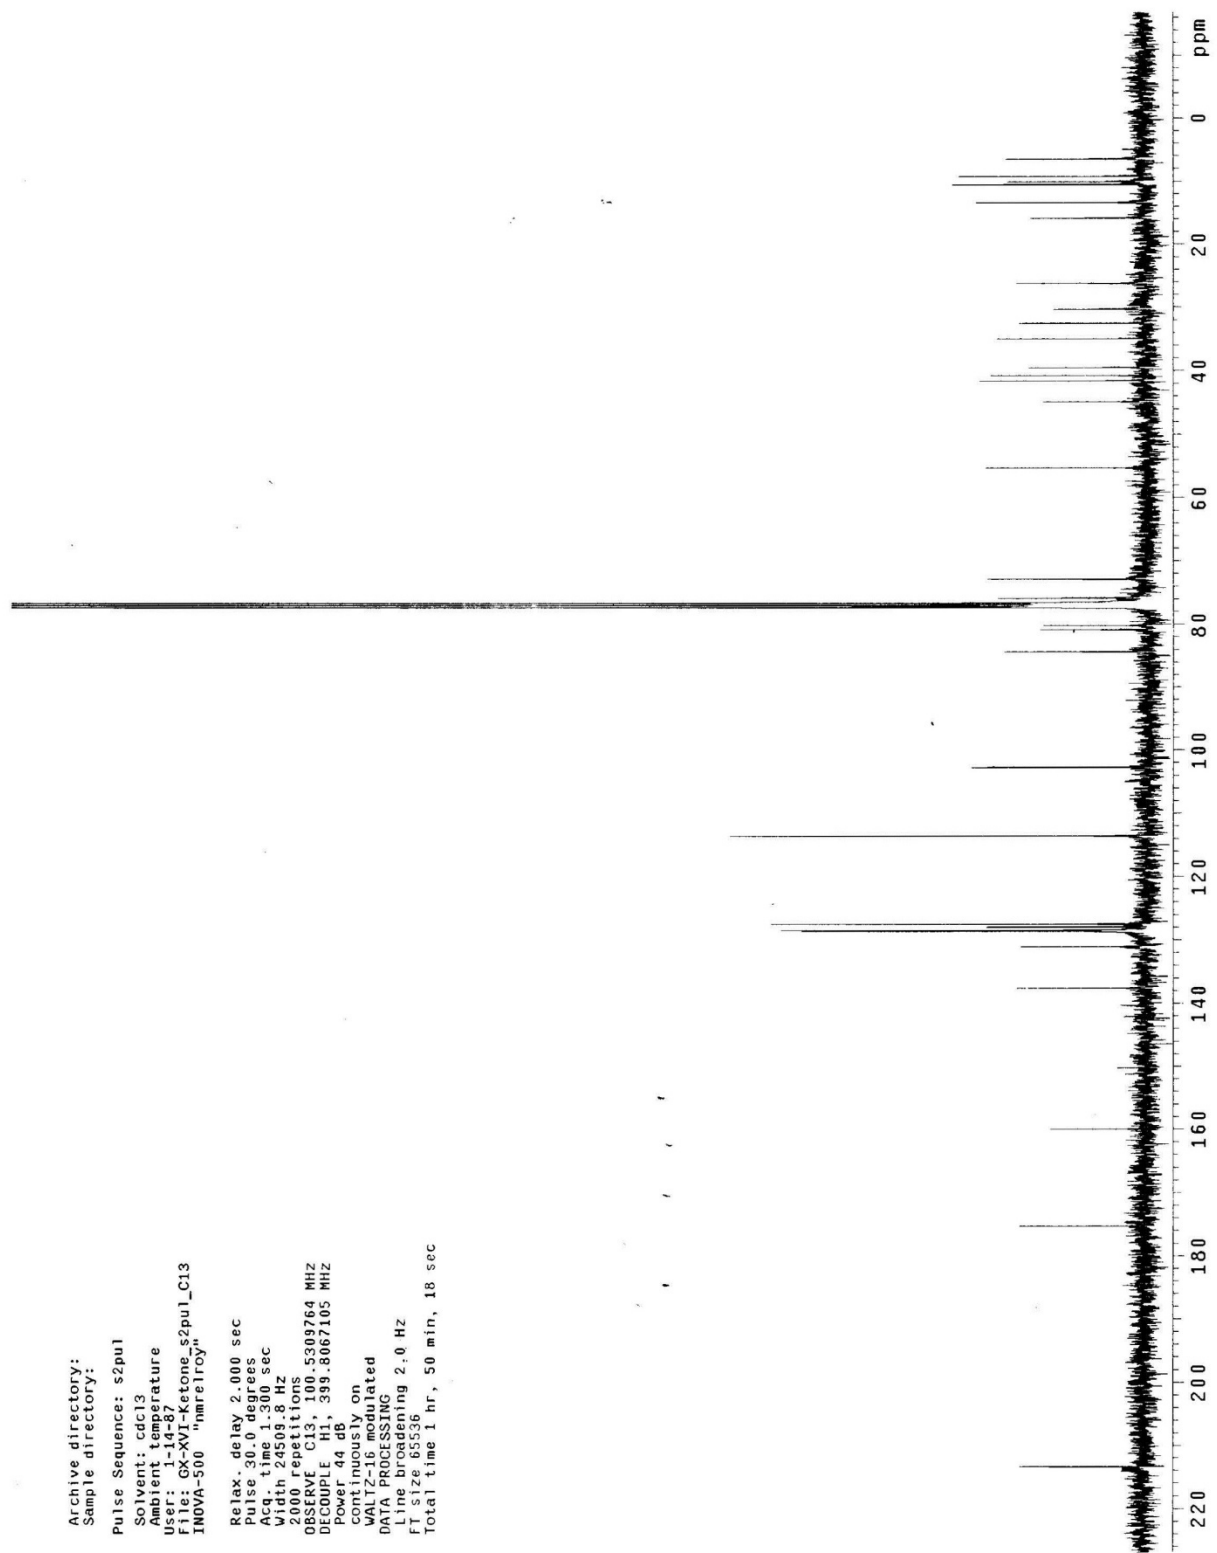



**(1*S*,2*R*,5*R*,6*S*,7*S*,8*R*,10*R*,12*S*,13*S*,15*S*,17*R*)-7-(benzyloxy)-5-ethyl-15-(4-methoxyphenyl)-2,6,8,10,12,17-hexamethyl-4,14,16-trioxabicyclo[11.3.1]heptadecane-3,9-dione**

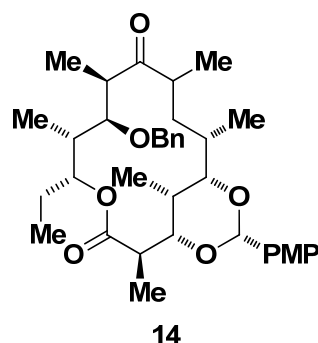

A solution of (1*S*,2*R*,5*R*,6*S*,7*S*,8*R*,12*S*,13*S*,15*S*,17*R*)-7-(benzyloxy)-5-ethyl-15-(4-methoxyphenyl)-2,6,8,12,17-pentamethyl-4,14,16-trioxabicyclo[11.3.1]heptadecane-3,9-dione (16.5 mg, 0.0284 mmol, 100 mol%) in THF (0.8 mL, 0.05 M) was cooled to -78 °C. To this solution was added LHMDS (0.071 mL, 1.0 M, 0.071 mmol, 250 mol%) dropwise. The reaction was stirred at -40 °C for 30 min, and recooled to -78 °C. Freshly distilled MeI (20.2 mg, 0.142 mmol, 500 mol%) was added to the reaction and the mixture was warmed to room temperature slowly. pH = 7 buffer solution was added and the mixture was extracted with ethyl ether (3 × 3 mL). The combined organic extracts were dried (MgSO<sub>4</sub>), filtered and concentrated under reduced pressure. The residue was purified by flash column chromatography (SiO<sub>2</sub>: ethyl acetate:hexanes, 1:15) to give the title compound (14.4 mg, 0.024 mmol) as a colorless oil in 85% yield, mixture of diastereomers.

**TLC (SiO<sub>2</sub>):** R<sub>f</sub> = 0.40 (ethyl acetate:hexanes, 1:9).

**FTIR** (neat):  $\nu$  2971, 2934, 2034, 1701, 1618, 1518, 1454, 1305, 1248, 1173, 983, 891, 830, 809, 726, 719, 667.

**HRMS:** (CI) Calcd. for C<sub>36</sub>H<sub>51</sub>O<sub>7</sub> [M+H]<sup>+</sup>: 595.3636, Found: 595.3636.

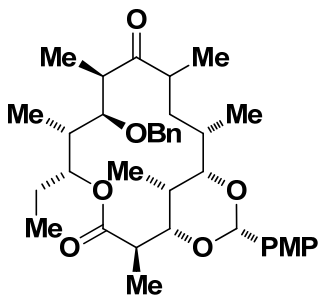

Archive directory:  
Sample directory:

Pulse Sequence: s2pul  
Solvent: cdcl3  
Ambient temperature  
File: GX-XVI-44 s2pul\_H1  
INOVA-500 "nmrf1roy",

Relax. delay 2.000 sec  
Pulse 30.0 degrees  
Acq. time 4.000 sec  
Width 6410.3 Hz  
64 repetitions

OBSERVE H1, 399.8047113 MHZ  
DATA PROCESSING  
Line broadening 0.1 Hz  
FT size 65536  
Total time 6 min, 36 sec

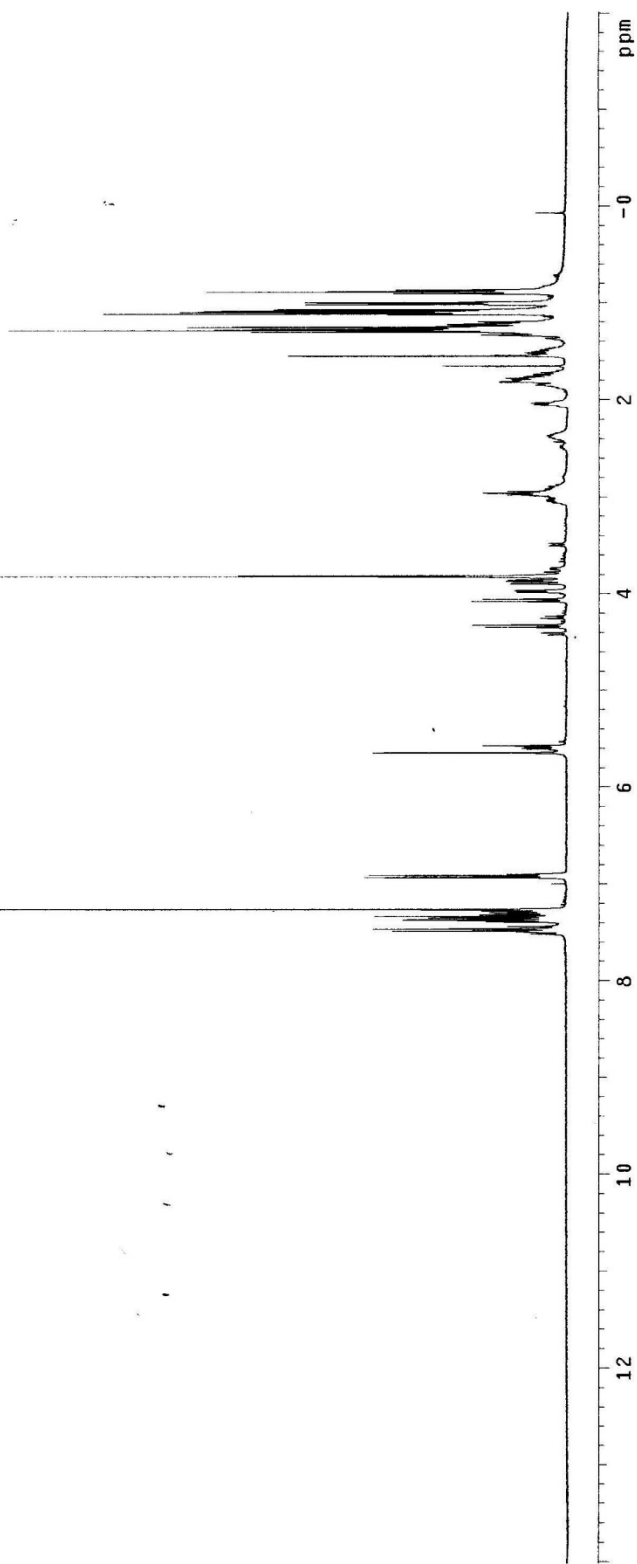

Archive directory:  
Sample directory:  
Pulse Sequence: s2pul  
Solvent: cdcl3  
Ambient temperature  
User: 1-14-87  
File: GX-XVI-44\_s2pul\_C13  
INOVA-500 "nmre1roy"

Relax. delay 2.000 sec  
Pulse 30.0 degrees  
Acq. time 1.300 sec  
Width 24509.8 Hz  
5000 repetitions  
OBSERVE C13, 100.5309756 MHZ  
DECOUPLE H1, 399.8067105 MHZ  
Power 44 dB  
continuously on  
WALTZ-16 modulated  
DATA PROCESSING  
Line broadening 2.0 Hz  
File size 83536  
Total time 4 hr, 35 min, 47 sec

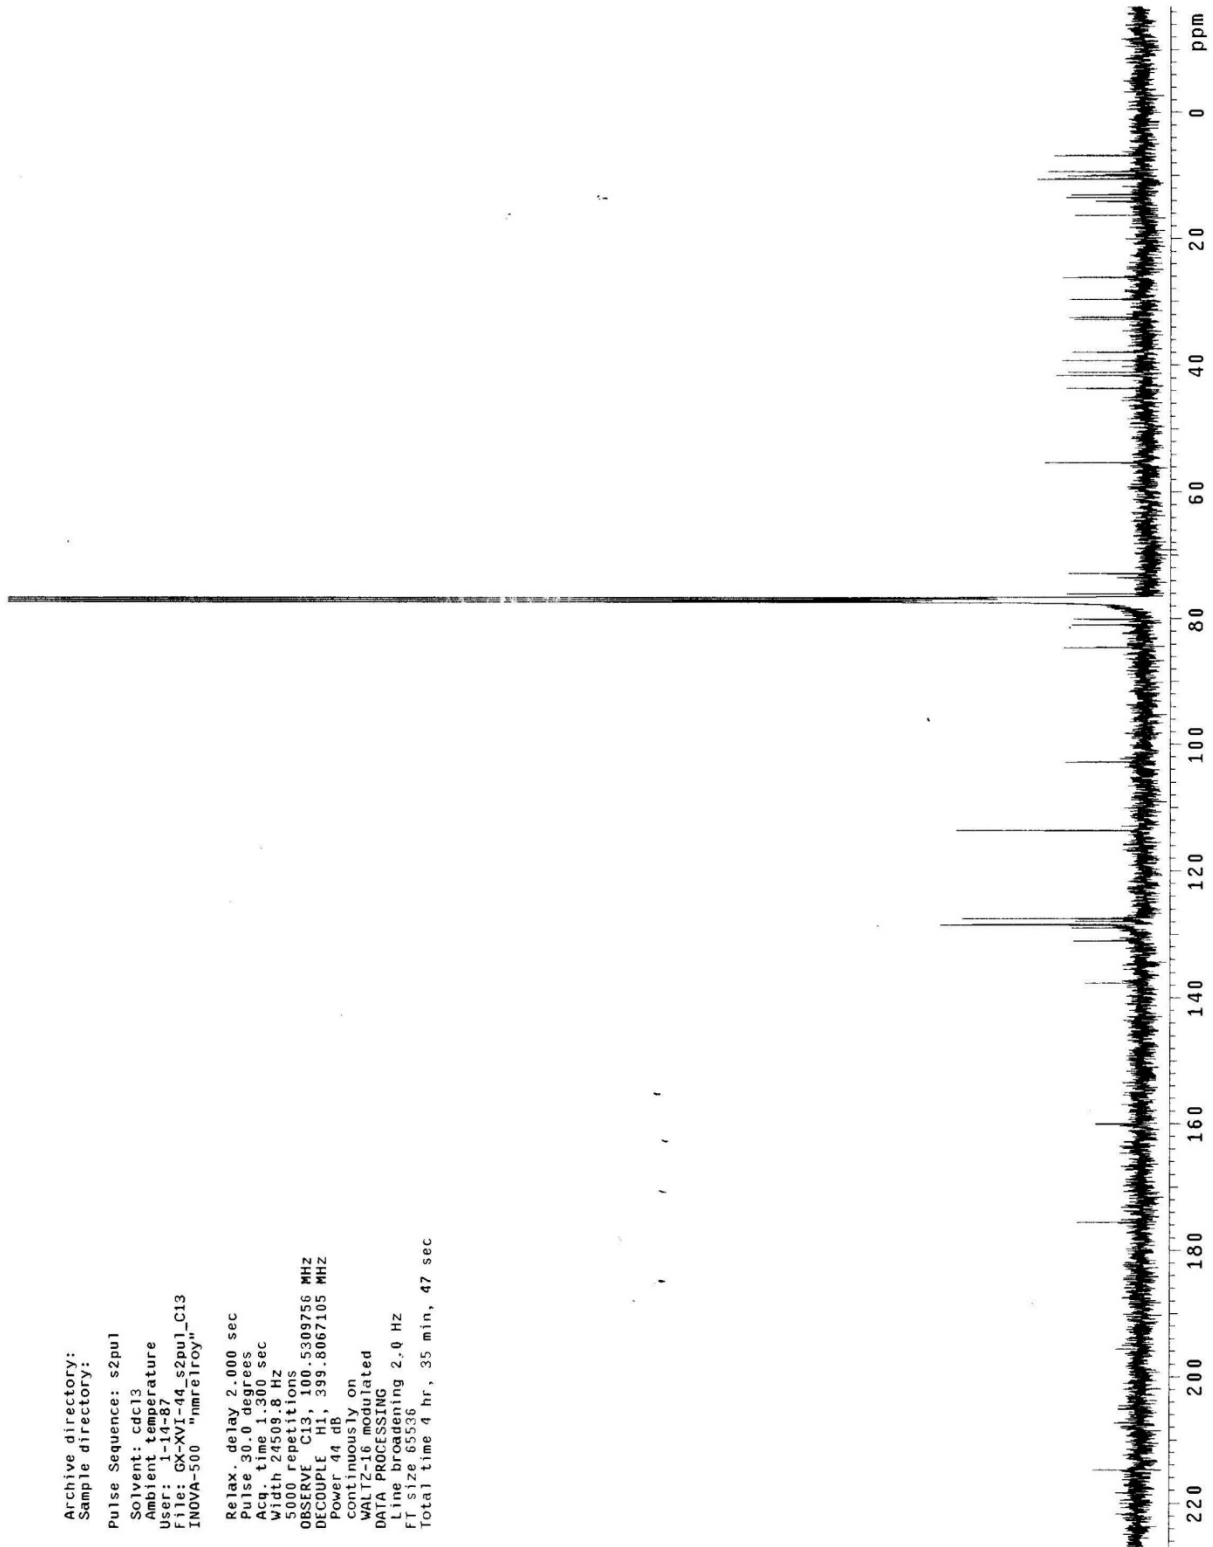

**6-Deoxyerythronolide B:**

**(3*R*,4*S*,5*R*,6*S*,7*S*,9*R*,11*R*,12*S*,13*R*,14*R*)-14-ethyl-4,6,12-trihydroxy-3,5,7,9,11,13-hexamethyloxacyclotetradecane-2,10-dione**

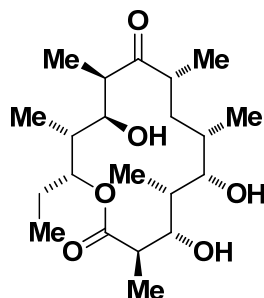

**6-Deoxyerythronolide B**

An oven-dried sealed tube under an atmosphere of H<sub>2</sub> was charged with (1*S*,2*R*,5*R*,6*S*,7*S*,8*R*,10*R*,12*S*,13*S*,15*S*,17*R*)-7-(benzyloxy)-5-ethyl-15-(4-methoxyphenyl)-2,6,8,10,12,17-hexamethyl-4,14,16-trioxabicyclo[11.3.1]heptadecane-3,9-dione (15 mg, 0.025 mmol, 100 mol%), Pd(OAc)<sub>2</sub> (2.3 mg, 0.010 mmol, 40 mol%) and *i*-propanol (0.5 mL, 0.05 M). The mixture was allowed to stir at room temperature under balloon pressure of H<sub>2</sub> overnight. Hexane was added when reaction was finished. Purification of the residue by column chromatography (SiO<sub>2</sub>; ethyl acetate: hexanes, 1:5) provides the title compound (9.0 mg, 0.0233 mmol) as a colorless viscous oil which solidified on standing in 93% yield.

**TLC (SiO<sub>2</sub>):** R<sub>f</sub> = 0.34 (ethyl acetate:hexanes, 1:3).

**<sup>1</sup>H NMR**(500 MHz, CDCl<sub>3</sub>): δ 5.15 (ddd, *J* = 9.5, 4.0, 1.5 Hz, 1H), 4.02-4.00 (m, 1H), 3.93 (dd, *J* = 10.5, 3.0 Hz, 1H), 3.86 (dd, *J* = 4.5, 1.0 Hz, 1H), 3.68 (ddd, *J* = 10.5, 5.0, 2.5 Hz, 1H), 2.84 (d, *J* = 3.0 Hz, 1H), 2.82-2.74 (m, 1H), 2.66-2.50 (m, 1H), 2.08-2.00 (m, 1H), 2.01 (d, *J* = 3.5 Hz, 1H), 1.86 (qd, *J* = 6.5, 1.5 Hz, 1H), 1.84-1.79 (m, 1H), 1.74-1.72 (m, 1H), 1.70-1.65 (m, 1H), 1.55-1.50 (m, 1H), 1.30 (d, *J* = 7.0 Hz, 3H), 1.28-1.21 (m, 1H), 1.07 (d, *J* = 7.0 Hz, 3H), 1.06 (d, *J* = 6.5 Hz, 3H), 1.05 (d, *J* = 7.0 Hz, 3H), 1.02 (d, *J* = 6.5 Hz, 1H), 0.94 (t, *J* = 7.5 Hz, 3H), 0.89 (d, *J* = 7.0 Hz, 3H).

**<sup>13</sup>C NMR** (125 MHz, CDCl<sub>3</sub>): δ 213.4, 178.4, 79.5, 76.5, 76.3, 70.9, 44.0, 43.4, 40.6, 39.3, 37.7, 37.5, 35.6, 25.4, 16.6, 14.8, 13.3, 10.6, 9.2, 6.9, 6.2.

**[α]<sub>D</sub><sup>22</sup>** = -34.1 (c = 0.41, CH<sub>2</sub>Cl<sub>2</sub>).

**FTIR** (neat): ν 3363, 2973, 1700, 1640, 1458, 1373, 1185, 1097, 940, 905, 727, 580.

**HRMS:** (CI) Calcd. for C<sub>21</sub>H<sub>38</sub>O<sub>6</sub>Na [M+Na]<sup>+</sup>: 409.25606, Found: 409.25614.

*The spectroscopic properties of this compound were consistent with the data available in the literature.*<sup>2</sup>

---

<sup>2</sup> (a) Evans, D. A.; Kim, A. S. *Tetrahedron Lett.* **1997**, 38, 53. (b) Evans, D. A.; Kim, A. S.; Metternich, R.; Novack, V. J. *J. Am. Chem. Soc.* **1998**, 120, 5921. (c) Stang, E. M.; White, M. C. *Nat. Chem.* **2009**, 1, 547.

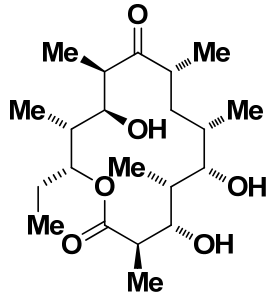

Archive directory:  
 Sample directory:  
 Pulse Sequence: s2pul  
 Solvent: cdcl3  
 Ambient temperature  
 File: GX-XVI-6-DEB\_s2pul\_H1  
 INOVA-500 "nmrelFOY"  
 Relax\_delay 2.000 sec  
 Pulse 30.0 degrees  
 Acq. time 4.000 sec  
 Width 6410.3 Hz  
 512 repetitions  
 OBSERVE H1, 399.8047107 MHz  
 DATA PROCESSING  
 Line broadening 0.1 Hz  
 FT size 65536  
 Total time 51 min, 28 sec

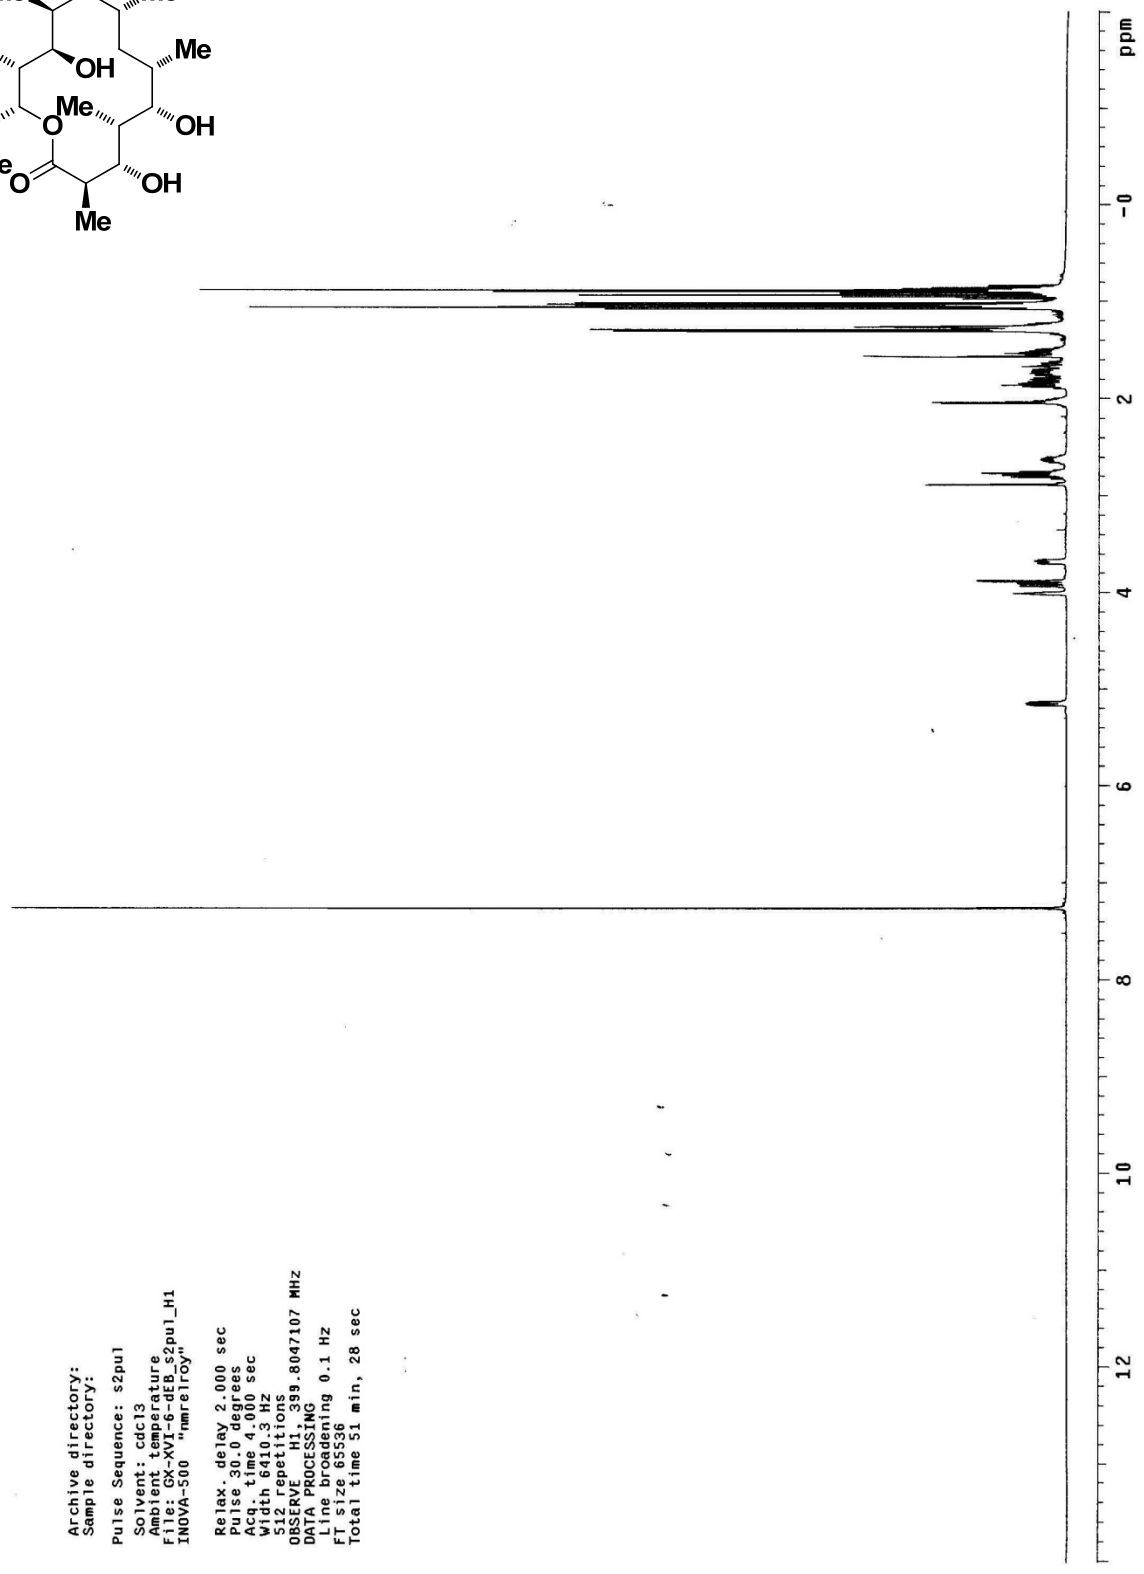

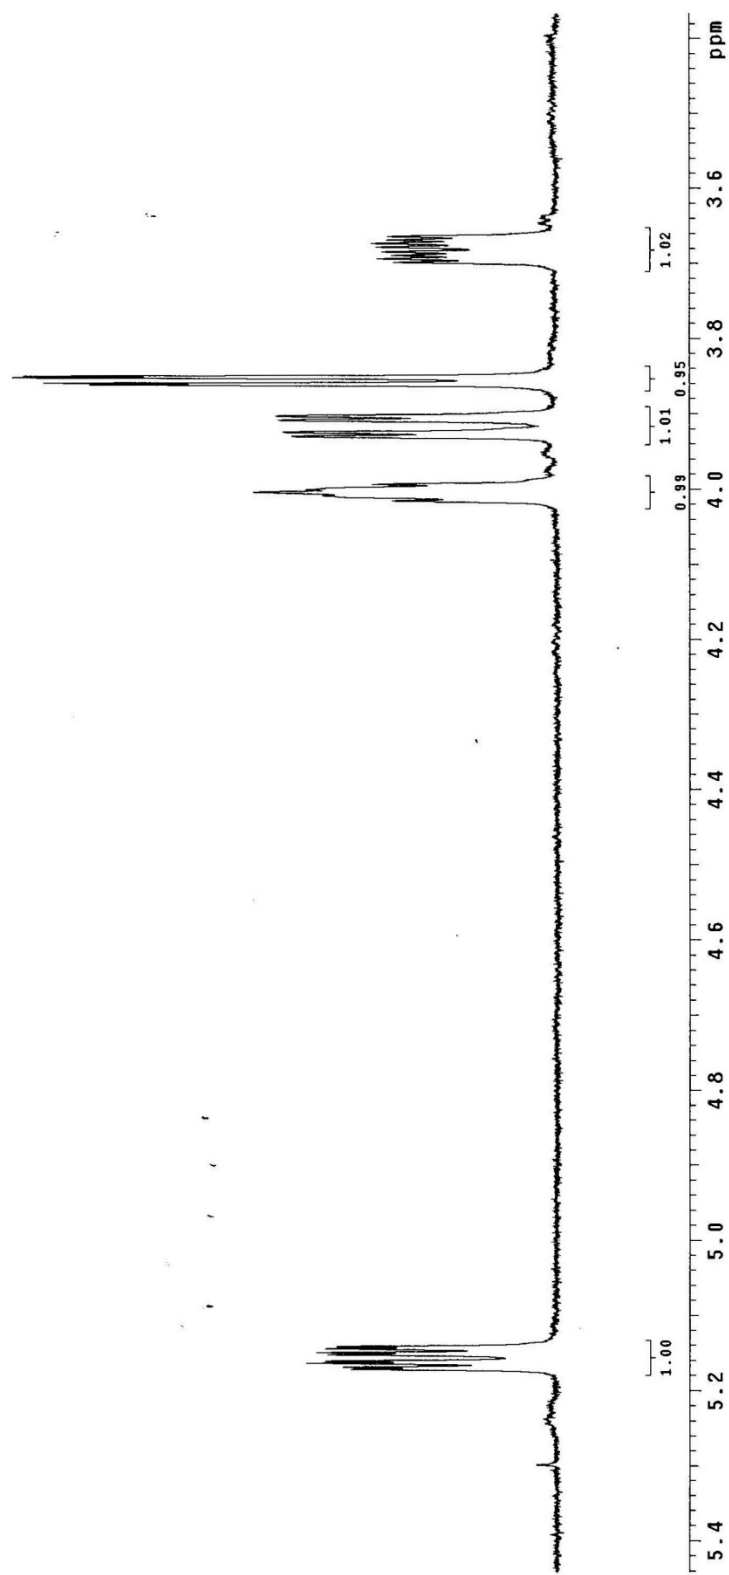

SS

gx\_xvi\_49\_h1

File: Proton

Pulse Sequence: s2pu1

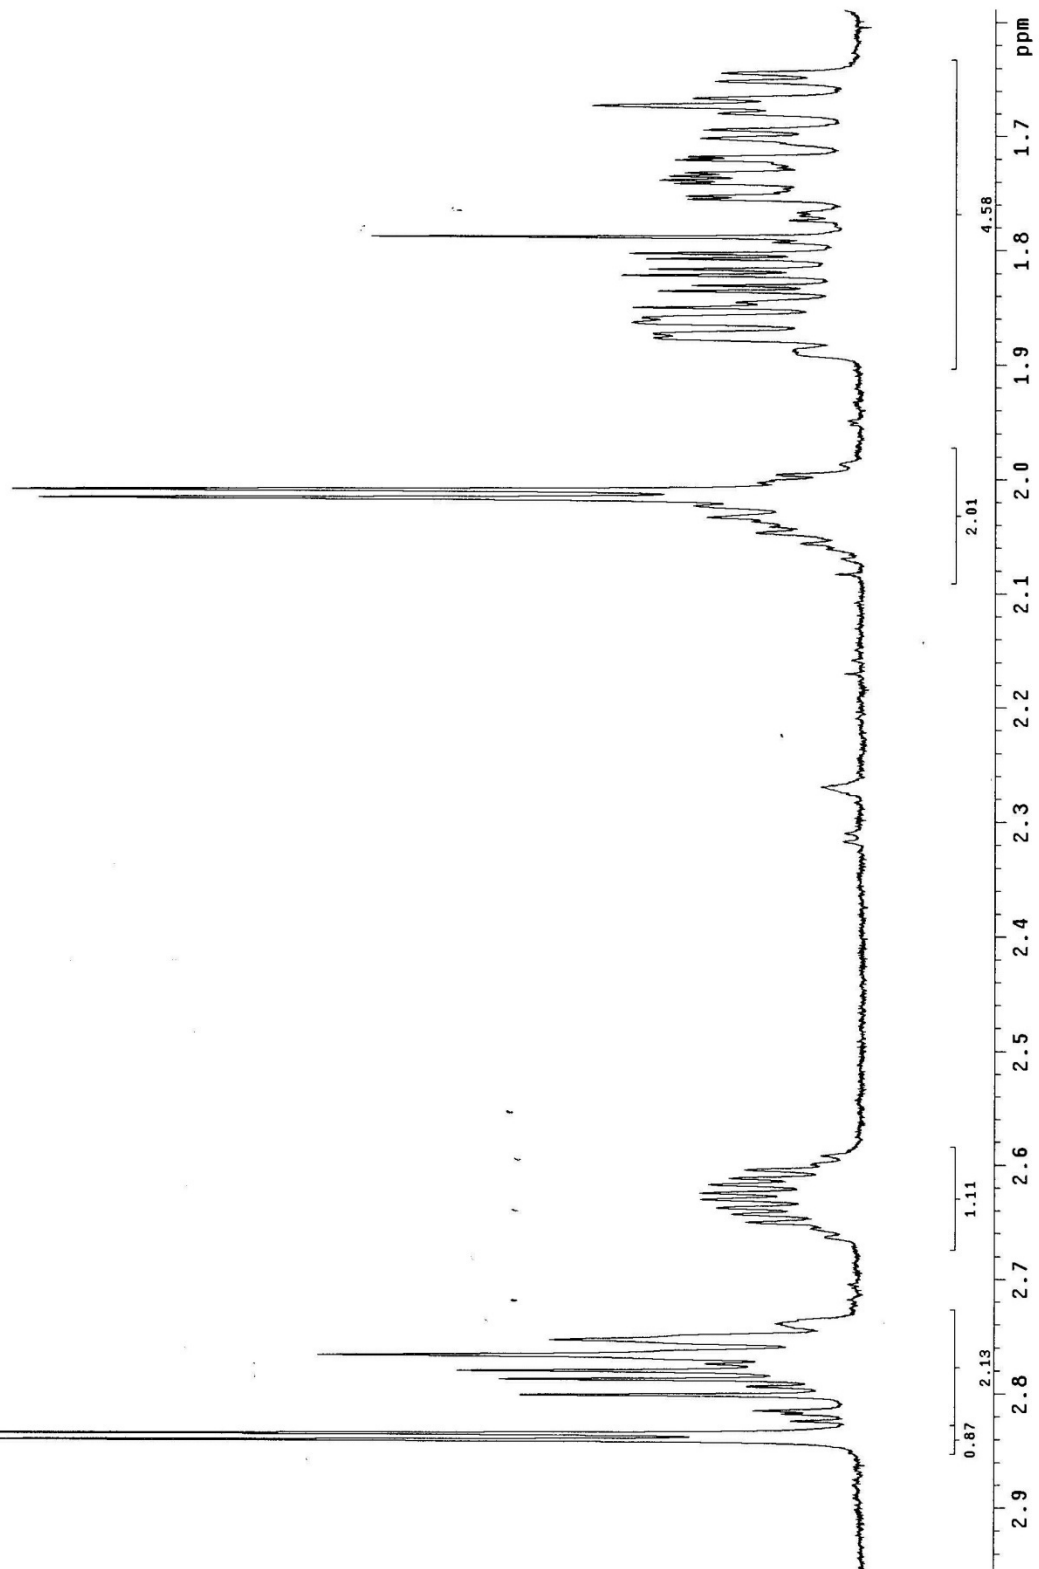



SS

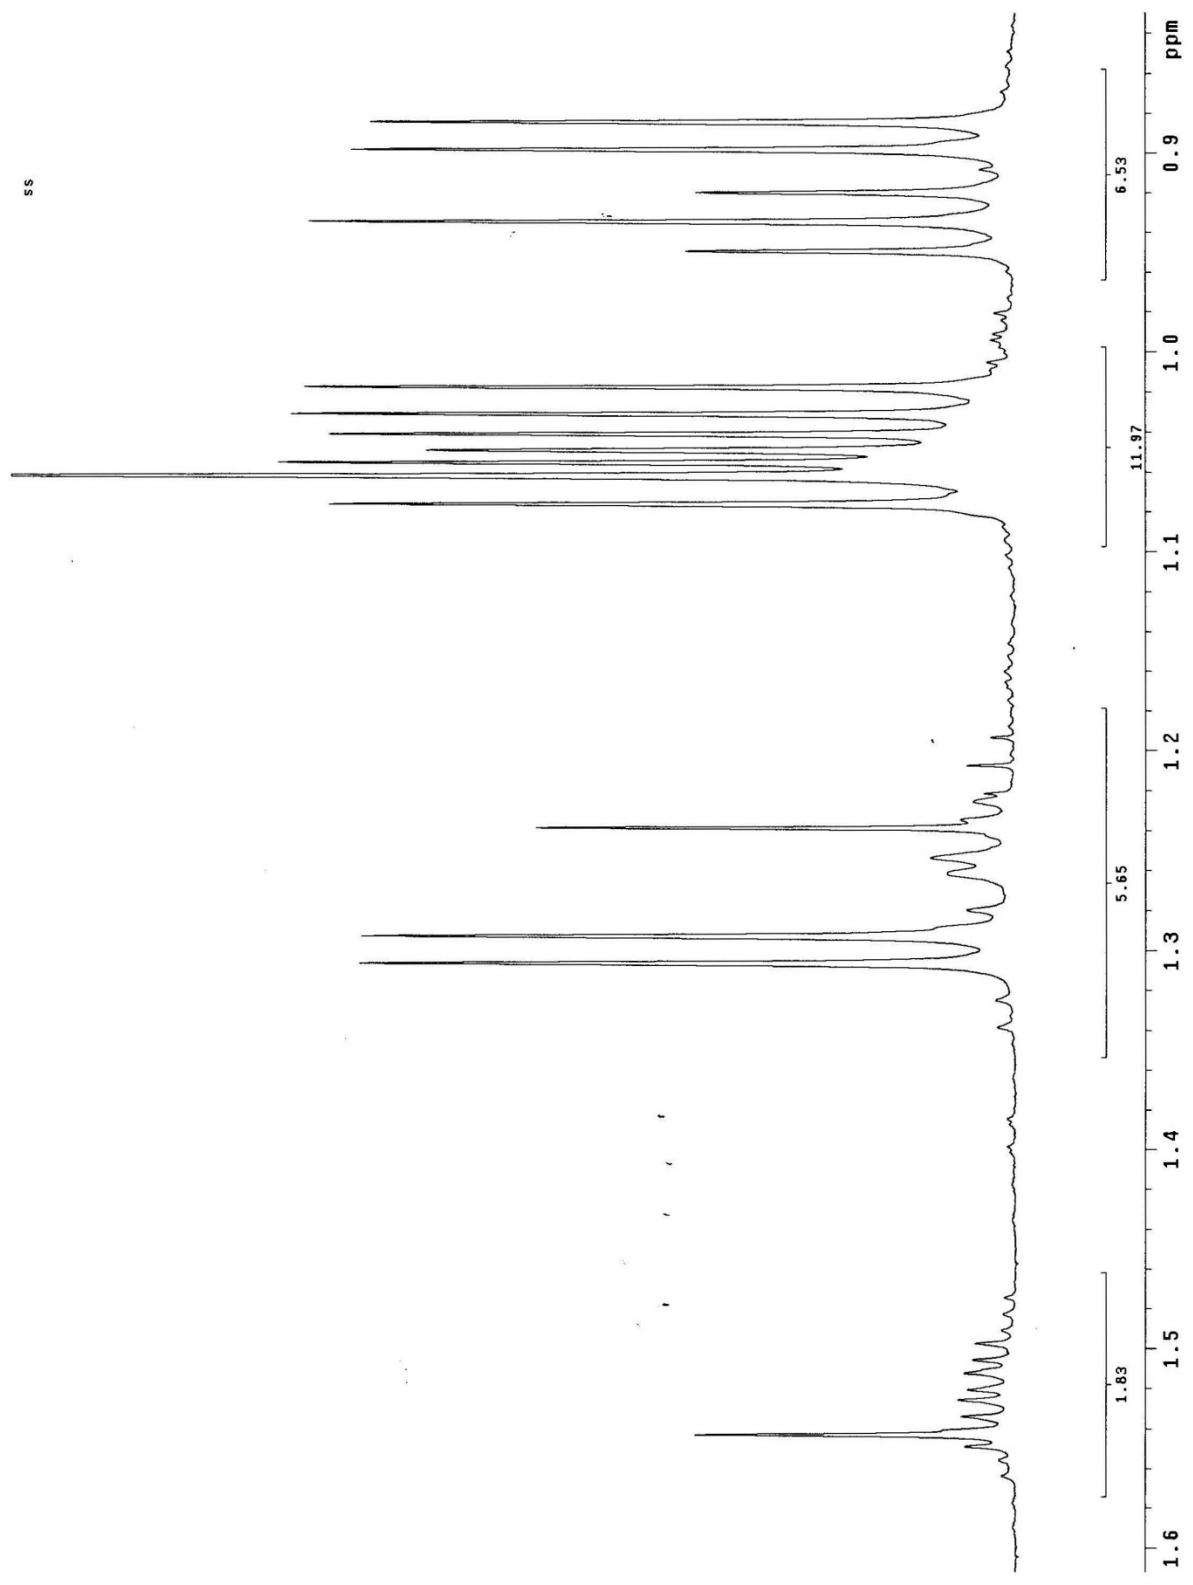

**Krische's Sample  
(CDCl<sub>3</sub>, 500 MHz)**

**White's Sample  
(CDCl<sub>3</sub>, 500 MHz)**

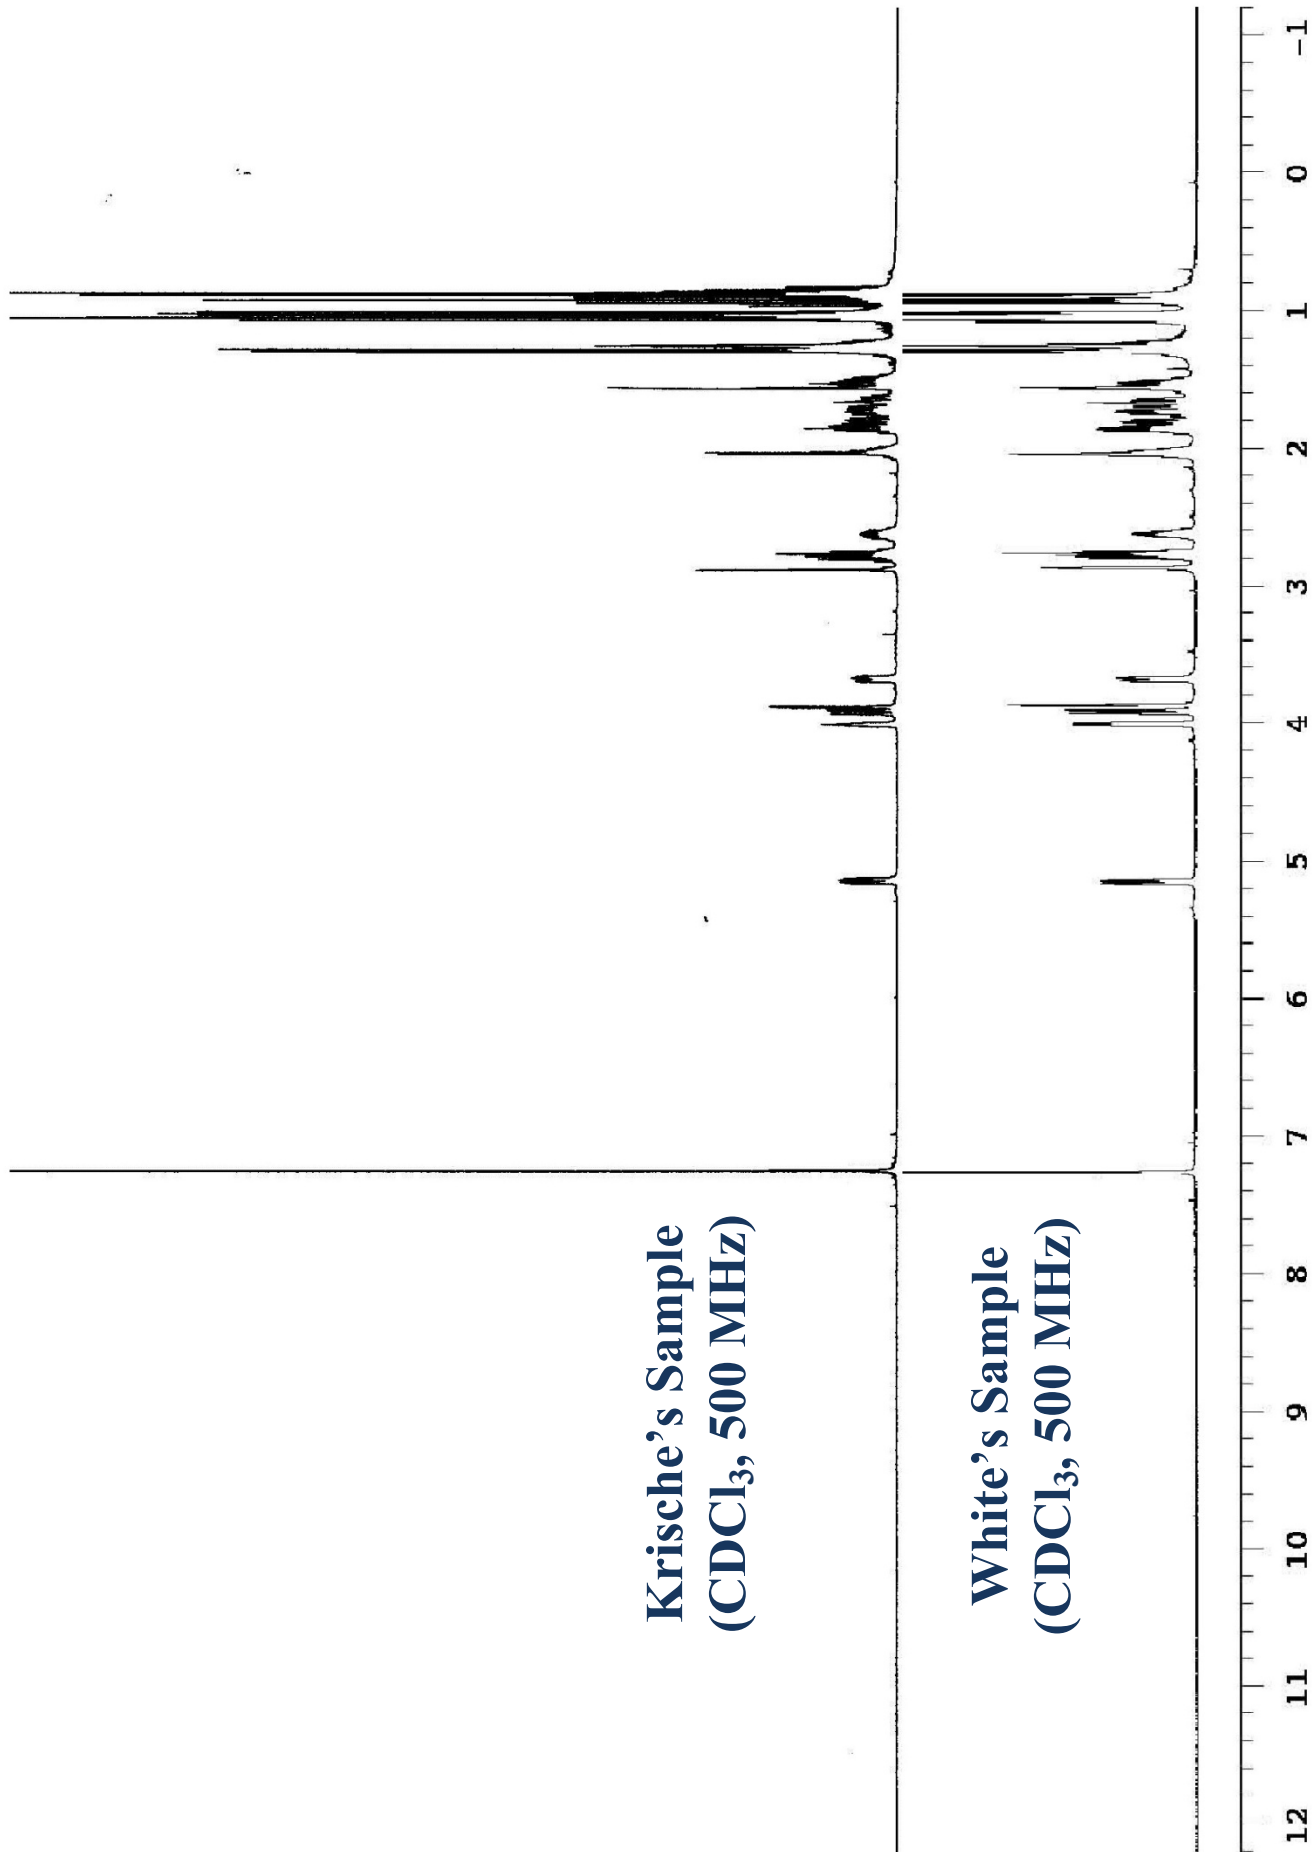

9x\_xvi\_49\_60h\_c13

Archive directory:  
Sample directory:

Pulse Sequence: s2pul  
Solvent: cdcl3  
Temp.: 27.0 C / 300.1 K  
User: 1-14-87  
File: 9x\_xvi\_49\_60h\_c13  
INOVA-500 "nmrfe1roy"

Relax. delay 2.000 sec  
Pulse 30.0 degrees  
Acq. time 2.000 sec  
Width 32653.1 Hz  
59953 repetitions  
OBSERVE C13, 125.5711277 MHZ  
DECOUPLE H1, 499.3901626 MHZ  
Power 33 dB  
continuously on  
WALTZ-16 modulated  
DATA PROCESSING  
Line broadening 2.0 Hz  
FT size 131072  
Total time 66 hr, 48 min, 54 sec

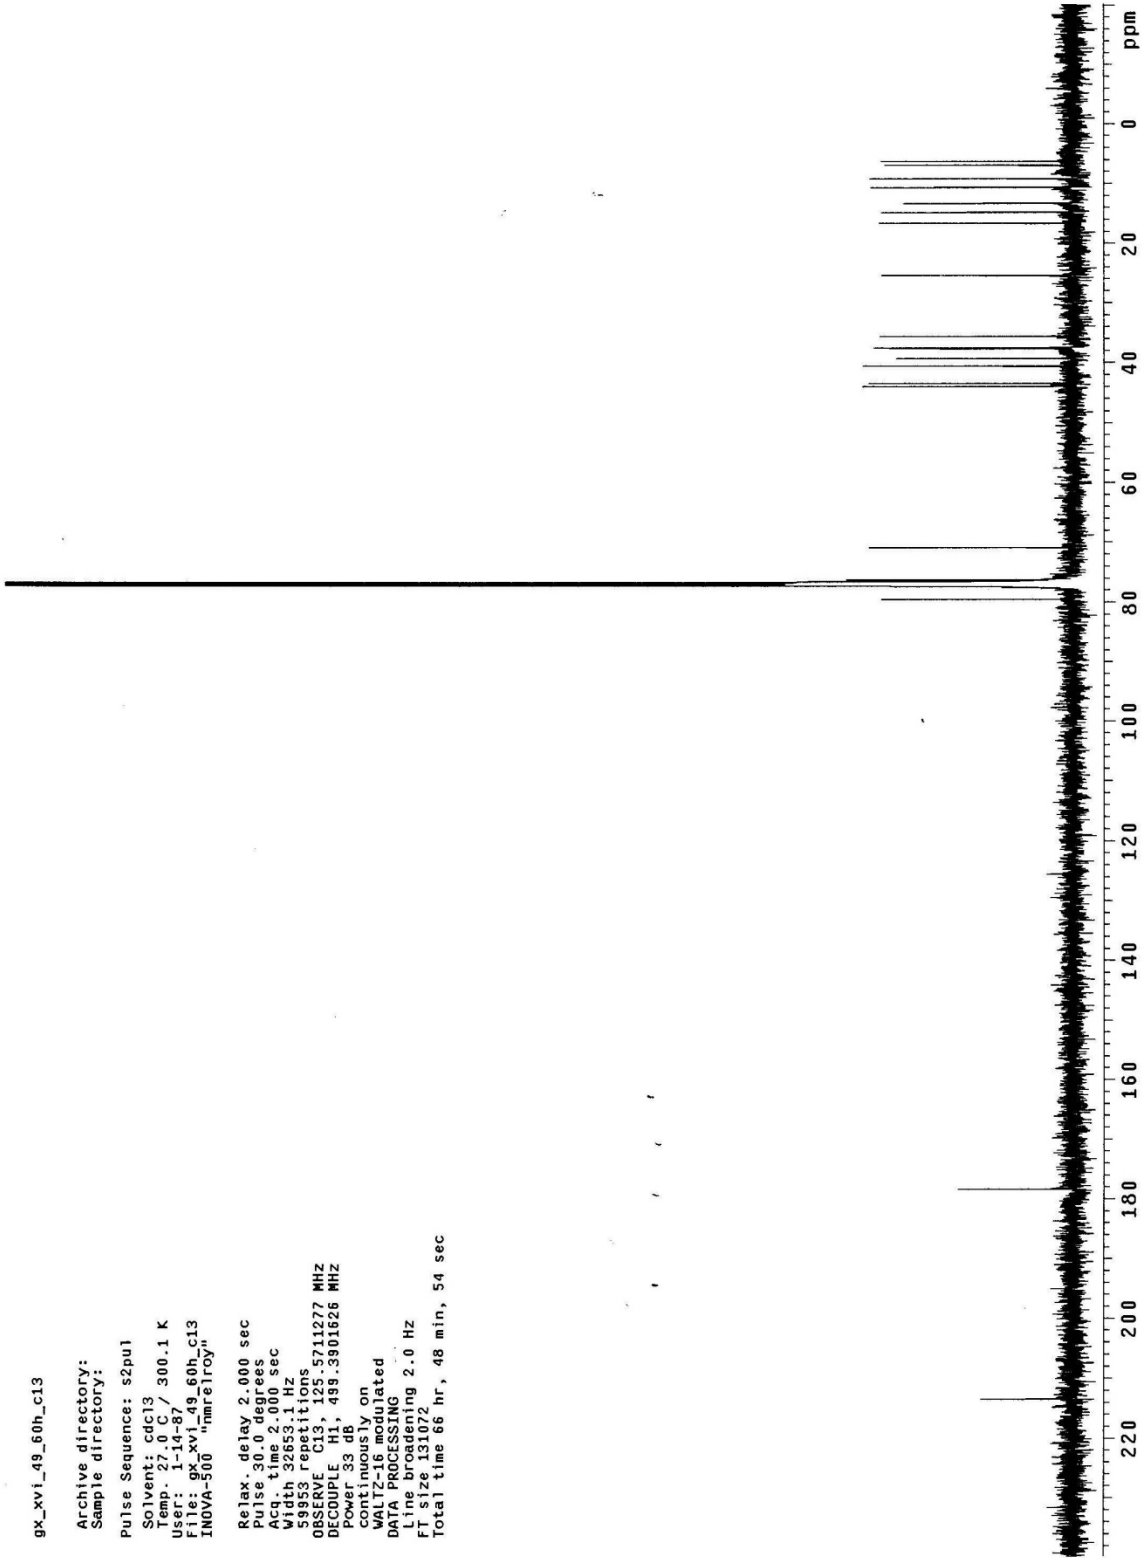

# Target Compound Screening Report

**Data File** MSF1012-0580-hrESIp0s1.d    **Sample Name** MSF1012-0580    **Comment** GX-6-DEB  
**Position** P1-B9    **Instrument Name** US10252005    **User Name**  
**Acq Method** DualESIp0sMeOH\_gt250\_vcap3000.m    **Acquired Time** 11/2/2012 2:55:31 PM    **DA Method** FindByFormula\_22Nov2011.m

MS Zoomed Spectrum

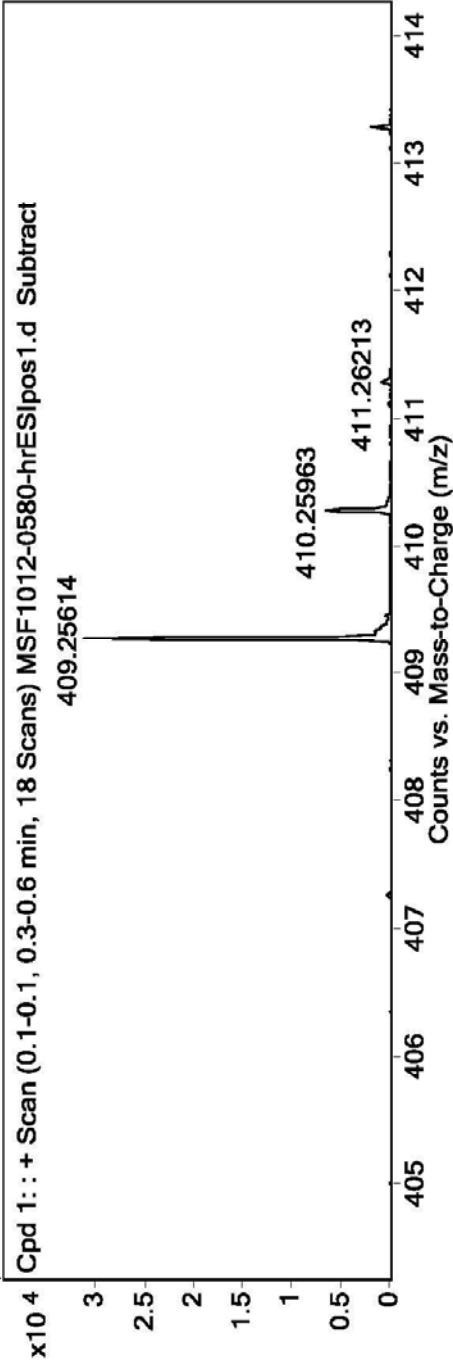

MS Spectrum Peak List

| Obs. m/z  | Calc. m/z | Charge | Abund   | Formula    | Ion/Isotope | Tgt. Mass Error (ppm) |
|-----------|-----------|--------|---------|------------|-------------|-----------------------|
| 409.25614 | 409.25606 | 1      | 32141.7 | C21H38NaO6 | (M+Na)+     | 0.19                  |
| 410.25963 | 410.25948 | 1      | 6974.8  | C21H38NaO6 | (M+Na)+     | 0.37                  |
| 411.26213 | 411.26207 | 1      | 1103.3  | C21H38NaO6 | (M+Na)+     | 0.16                  |
| 412.26739 | 412.26474 | 1      | 172.8   | C21H38NaO6 | (M+Na)+     | 6.41                  |

... End Of Report ...

## Comparison of <sup>1</sup>H NMR for Synthetic 6-Deoxyerythronolide B

| Proton# | Evans<br>(CDCl <sub>3</sub> , 400 MHz) | White<br>(CDCl <sub>3</sub> , 500 MHz) | Krische<br>(CDCl <sub>3</sub> , 500 MHz) |
|---------|----------------------------------------|----------------------------------------|------------------------------------------|
| 1       | 5.14 (ddd, 9.6, 4.0, 1.1)              | 5.15 (ddd, 9.6, 4.0, 1.0)              | 5.15 (ddd, 9.5, 4.0, 1.5)                |
| 2       | 3.99 (ddd, 4.8, 3.4, 1.7)              | 4.00 (m)                               | 4.02-4.00 (m)                            |
| 3       | 3.91 (ddd, 10.3, 2.8, <1.0)            | 3.92 (d, 10.5)                         | 3.93 (dd, 10.5, 3.0)                     |
| 4       | 3.87 (d, 4.4)                          | 3.87 (d, 4.0)                          | 3.86 (dd, 4.5, 1.0)                      |
| 5       | 3.67 (ddd, 10.2, 4.4, 2.0)             | 3.68 (ddd, 10.0, 4.5, 2.0)             | 3.68 (ddd, 10.5, 5.0, 2.5)               |
| 6       | 3.02 (d, 2.8)                          | 2.87 (d, 1.5)                          | 2.84 (d, 3.0)                            |
| 7       | 2.78 (m)                               | 2.78 (m)                               | 2.82-2.74 (m)                            |
| 8       | 2.62 (m)                               | 2.63 (m)                               | 2.66-2.50 (m)                            |
| 9       | 2.25 (d, 3.4)                          |                                        | 2.08-2.00 (m)                            |
| 10      | 2.02 (m)                               | 2.05-2.00 (m)                          | 2.01 (d, 3.5)                            |
| 11      | 1.86 (qd, 6.2, 1.7)                    |                                        | 1.86 (qd, 6.5, 1.5)                      |
| 12      | 1.82 (m)                               | 1.89-1.79 (m)                          | 1.84-1.79 (m)                            |
| 13      | 1.73 (m)                               |                                        | 1.74-1.72 (m)                            |
| 14      | 1.67 (m)                               | 1.75-1.64 (m)                          | 1.70-1.65 (m)                            |
| 15      | 1.51 (m)                               | 1.53 (m)                               | 1.55-1.50 (m)                            |
| 16      | 1.29 (d, 6.7)                          | 1.30 (d, 7.0)                          | 1.30 (d, 7.0)                            |
| 17      | 1.25 (m)                               | 1.25 (m)                               | 1.28-1.21 (m)                            |
| 18      | 1.06 (d, 7.0)                          | 1.07 (d, 7.0)                          | 1.07 (d, 7.0)                            |
| 19      | 1.04 (d, 6.4)                          | 1.06 (d, 7.0)                          | 1.06 (d, 6.5)                            |
| 20      | 1.04 (d, 7.2)                          | 1.05 (d, 7.0)                          | 1.05 (d, 7.0)                            |
| 21      | 1.01 (d, 6.8)                          | 1.02 (d, 6.5)                          | 1.02 (d, 6.5)                            |
| 22      | 0.93 (t, 7.3)                          | 0.93 (t, 7.5)                          | 0.94 (t, 7.5)                            |
| 21      | 0.88 (d, 7.0)                          | 0.89 (d, 7.0)                          | 0.89 (d, 7.0)                            |

## Comparison of $^{13}\text{C}$ NMR for Synthetic 6-Deoxyerythronolide B

| Carbon# | White<br>( $\text{CDCl}_3$ , 125 MHz) | Krische<br>( $\text{CDCl}_3$ , 125 MHz) |
|---------|---------------------------------------|-----------------------------------------|
| 1       | 213.5                                 | 213.4                                   |
| 2       | 178.4                                 | 178.4                                   |
| 3       | 79.5                                  | 79.5                                    |
| 4       | 76.5                                  | 76.5                                    |
| 5       | 76.3                                  | 76.3                                    |
| 6       | 70.9                                  | 70.9                                    |
| 7       | 43.9                                  | 44.0                                    |
| 8       | 43.4                                  | 43.4                                    |
| 9       | 40.6                                  | 40.6                                    |
| 10      | 39.2                                  | 39.3                                    |
| 11      | 37.7                                  | 37.7                                    |
| 12      | 37.5                                  | 37.5                                    |
| 13      | 35.6                                  | 35.6                                    |
| 14      | 25.4                                  | 25.4                                    |
| 15      | 16.6                                  | 16.6                                    |
| 16      | 14.8                                  | 14.8                                    |
| 17      | 13.2                                  | 13.3                                    |
| 18      | 10.6                                  | 10.6                                    |
| 19      | 9.2                                   | 9.2                                     |
| 20      | 6.9                                   | 6.9                                     |
| 21      | 6.2                                   | 6.2                                     |
